# Supplementary material for: No Support for Historical Candidate Gene or Candidate Gene-by-Interaction Hypotheses for Major Depression Across Multiple Large Samples
Source: Atypon-hosted journal article supplement (doi:10.1176/appi.ajp.2018.18070881), 2019-03-08
Supplement: appi.ajp.2018.18070881.ds001.pdf [file appi.ajp.2018.18070881.ds001.pdf]

Supplement to *No support for historic candidate gene or candidate  
gene-by-interaction hypotheses for major depression  
across multiple large samples*

## Contents

|           |                                                                 |           |
|-----------|-----------------------------------------------------------------|-----------|
| <b>I</b>  | <b>Supplemental methods</b>                                     | <b>4</b>  |
| <b>S1</b> | <b>Identification of top genes and polymorphisms</b>            | <b>4</b>  |
| <b>S2</b> | <b>Genotyping and quality control</b>                           | <b>11</b> |
| S2.1      | PGC sample                                                      | 11        |
| S2.2      | UKBB sample                                                     | 11        |
| <b>S3</b> | <b>Measures</b>                                                 | <b>12</b> |
| S3.1      | Outcome measures                                                | 12        |
| S3.1.1    | Estimated lifetime MDD Diagnosis                                | 13        |
| S3.1.2    | Conditional lifetime symptom count                              | 13        |
| S3.1.3    | Current MDD severity                                            | 14        |
| S3.1.4    | Lifetime episode count                                          | 14        |
| S3.1.5    | Touchscreen probable lifetime diagnosis, ordinal classification | 14        |
| S3.1.6    | Touchscreen probable lifetime diagnosis                         | 15        |
| S3.1.7    | Severe recurrent depression                                     | 15        |
| S3.1.8    | PGC lifetime MDD diagnosis                                      | 15        |
| S3.2      | Moderators                                                      | 17        |
| S3.2.1    | Childhood trauma                                                | 17        |
| S3.2.2    | Adult trauma                                                    | 18        |
| S3.2.3    | Recent trauma                                                   | 18        |
| S3.2.4    | Stressor-induced depression                                     | 19        |
| S3.2.5    | Townsend deprivation index (TDI)                                | 19        |
| <b>S4</b> | <b>Statistical models</b>                                       | <b>19</b> |
| S4.1      | Polymorphism-wise analyses                                      | 19        |
| S4.1.1    | Design matrix lower rank approximation                          | 21        |
| S4.2      | Gene-wise and gene-set analyses                                 | 23        |
| S4.2.1    | Gene-wise analyses                                              | 24        |
| S4.2.2    | Gene-set analyses                                               | 24        |
| S4.3      | Power analyses                                                  | 24        |
| S4.3.1    | Logistic models                                                 | 24        |
| S4.3.2    | Negative binomial models                                        | 24        |
| S4.3.3    | Power under measurement error regimes                           | 25        |
| S4.4      | Heritability and genetic correlation estimation                 | 28        |
| S4.5      | Replication of top PGC hits                                     | 29        |

|            |                                                                              |           |
|------------|------------------------------------------------------------------------------|-----------|
| S4.5.1     | Identification of independent loci . . . . .                                 | 29        |
| S4.5.2     | Association analyses . . . . .                                               | 29        |
| S4.5.3     | Replication power analysis and correction for the winner's curse . . . . .   | 29        |
| <b>S5</b>  | <b>Amendments to preregistration</b>                                         | <b>31</b> |
| S5.1       | Corrections . . . . .                                                        | 31        |
| S5.2       | Departures . . . . .                                                         | 31        |
| <b>II</b>  | <b>Supplemental results</b>                                                  | <b>33</b> |
| <b>S6</b>  | <b>Main effects of moderator variables</b>                                   | <b>34</b> |
| <b>S7</b>  | <b>Polymorphism level main effects</b>                                       | <b>35</b> |
| <b>S8</b>  | <b>Polymorphism level <math>G \times E</math> effects</b>                    | <b>39</b> |
| <b>S9</b>  | <b>Polymorphism level <math>G \times E</math> effects (alternate scale)</b>  | <b>47</b> |
| <b>S10</b> | <b>Polymorphism level <math>G \times E</math> effects (improper control)</b> | <b>55</b> |
| <b>S11</b> | <b>Gene-level results</b>                                                    | <b>61</b> |
| S11.1      | Gene-wise models . . . . .                                                   | 61        |
| S11.2      | Gene-set models . . . . .                                                    | 67        |
| S11.2.1    | Competitive tests . . . . .                                                  | 67        |
| S11.2.2    | Relative tests . . . . .                                                     | 68        |
| <b>S12</b> | <b>Attempted replication of top 16 independent PGC associations</b>          | <b>70</b> |
|            | <b>References</b>                                                            | <b>71</b> |

## List of Tables

|      |                                                                                                                                                                     |    |
|------|---------------------------------------------------------------------------------------------------------------------------------------------------------------------|----|
| S1.1 | Estimated lower bounds for the number of human association studies of each of the top 18 and 16 identified candidate genes and polymorphisms, respectively. . . . . | 4  |
| S3.1 | Bivariate correlations between UKBB depression phenotypes . . . . .                                                                                                 | 16 |
| S3.2 | Cohen's $\kappa$ (inter-rater reliability) between UKBB diagnosis phenotypes . . . . .                                                                              | 16 |
| S3.3 | LDSC genetic correlation estimates among depression phenotypes, height, and type 2 diabetes . . . . .                                                               | 20 |
| S3.4 | LDSC heritability estimates on the liability scale . . . . .                                                                                                        | 21 |
| S4.1 | Interaction models . . . . .                                                                                                                                        | 32 |
| S6.1 | Main effects of environmental moderators . . . . .                                                                                                                  | 34 |
| S7.1 | Estimated lifetime MDD diagnosis . . . . .                                                                                                                          | 35 |
| S7.2 | Current MDD severity . . . . .                                                                                                                                      | 35 |
| S7.3 | Conditional lifetime symptom count . . . . .                                                                                                                        | 36 |
| S7.4 | Lifetime episode count . . . . .                                                                                                                                    | 36 |
| S7.5 | Touchscreen probable lifetime diagnosis . . . . .                                                                                                                   | 37 |
| S7.6 | Touchscreen probable lifetime diagnosis, ordinal classification . . . . .                                                                                           | 37 |
| S7.7 | Severe recurrent MDD (MHF) . . . . .                                                                                                                                | 38 |
| S7.8 | PGC lifetime MDD diagnosis: main effect of variant . . . . .                                                                                                        | 38 |
| S8.1 | Estimated lifetime MDD diagnosis on variant $\times$ childhood trauma . . . . .                                                                                     | 39 |
| S8.2 | Estimated lifetime MDD diagnosis on variant $\times$ adult trauma . . . . .                                                                                         | 39 |
| S8.3 | Estimated lifetime MDD diagnosis on variant $\times$ TDI . . . . .                                                                                                  | 40 |
| S8.4 | Current MDD severity on variant $\times$ recent trauma . . . . .                                                                                                    | 40 |
| S8.5 | Conditional lifetime symptom count on variant $\times$ childhood trauma . . . . .                                                                                   | 41 |
| S8.6 | Conditional lifetime symptom count on variant $\times$ adult trauma . . . . .                                                                                       | 41 |

|        |                                                                                                           |    |
|--------|-----------------------------------------------------------------------------------------------------------|----|
| S8.7   | Conditional lifetime symptom count on variant $\times$ TDI                                                | 42 |
| S8.8   | Conditional lifetime symptom count on variant $\times$ stressor-induced depression                        | 42 |
| S8.9   | Lifetime episode count on variant $\times$ childhood trauma                                               | 43 |
| S8.10  | Lifetime episode count on variant $\times$ adult trauma                                                   | 43 |
| S8.11  | Lifetime episode count on variant $\times$ TDI                                                            | 44 |
| S8.12  | Touchscreen probable lifetime diagnosis on variant $\times$ TDI                                           | 44 |
| S8.13  | Touchscreen probable lifetime diagnosis, ordinal classification on variant $\times$ TDI                   | 45 |
| S8.14  | Severe recurrent MDD (MHF) on variant $\times$ adult trauma                                               | 45 |
| S8.15  | Severe recurrent MDD (MHF) on variant $\times$ childhood trauma                                           | 46 |
| S8.16  | Severe recurrent MDD (MHF) on variant $\times$ TDI                                                        | 46 |
| S9.1   | Estimated lifetime MDD diagnosis on variant $\times$ childhood trauma, alternate scale                    | 47 |
| S9.2   | Estimated lifetime MDD diagnosis on variant $\times$ adult trauma, alternate scale                        | 47 |
| S9.3   | Estimated lifetime MDD diagnosis on variant $\times$ TDI, alternate scale                                 | 48 |
| S9.4   | Current MDD severity (MHF) on variant $\times$ recent trauma, alternate scale                             | 48 |
| S9.5   | Conditional lifetime symptom count on variant $\times$ childhood trauma, alternate scale                  | 49 |
| S9.6   | Conditional lifetime symptom count on variant $\times$ adult trauma, alternate scale                      | 49 |
| S9.7   | Conditional lifetime symptom count on variant $\times$ TDI, alternate scale                               | 50 |
| S9.8   | Conditional lifetime symptom count on variant $\times$ stressor-induced depression, alternate scale       | 50 |
| S9.9   | Lifetime episode count on variant $\times$ childhood trauma, alternate scale                              | 51 |
| S9.10  | Lifetime episode count on variant $\times$ adult trauma, alternate scale                                  | 51 |
| S9.11  | Lifetime episode count on variant $\times$ TDI, alternate scale                                           | 52 |
| S9.12  | Touchscreen probable lifetime diagnosis on variant $\times$ TDI, alternate scale                          | 52 |
| S9.13  | Touchscreen probable lifetime diagnosis, ordinal classification on variant $\times$ TDI, alternate scale  | 53 |
| S9.14  | Severe recurrent MDD (MHF) on variant $\times$ childhood trauma, alternate scale                          | 53 |
| S9.15  | Severe recurrent MDD (MHF) on variant $\times$ childhood trauma, alternate scale                          | 54 |
| S9.16  | Severe recurrent MDD (MHF) on variant $\times$ TDI, alternate scale                                       | 54 |
| S10.1  | Estimated lifetime MDD diagnosis on variant $\times$ childhood trauma, improper control                   | 55 |
| S10.2  | Estimated lifetime MDD diagnosis on variant $\times$ adult trauma, improper control                       | 55 |
| S10.3  | Estimated lifetime MDD diagnosis on variant $\times$ TDI, improper control                                | 56 |
| S10.4  | Current MDD severity (MHF) on variant $\times$ recent trauma, improper control                            | 56 |
| S10.5  | Conditional lifetime symptom count on variant $\times$ childhood trauma, improper control                 | 57 |
| S10.6  | Conditional lifetime symptom count on variant $\times$ adult trauma, improper control                     | 57 |
| S10.7  | Conditional lifetime symptom count on variant $\times$ TDI, improper control                              | 58 |
| S10.8  | Conditional lifetime symptom count on variant $\times$ stressor-induced depression, improper control      | 58 |
| S10.9  | Lifetime episode count on variant $\times$ childhood trauma, improper control                             | 59 |
| S10.10 | Lifetime episode count on variant $\times$ adult trauma, improper control                                 | 59 |
| S10.11 | Lifetime episode count on variant $\times$ TDI, improper control                                          | 60 |
| S10.12 | Touchscreen probable lifetime diagnosis on variant $\times$ TDI, improper control                         | 60 |
| S10.13 | Touchscreen probable lifetime diagnosis, ordinal classification on variant $\times$ TDI, improper control | 61 |
| S11.1  | Gene-wise $p$ -values (primary analyses)                                                                  | 62 |
| S11.2  | Gene-wise $p$ -values (secondary analyses)                                                                | 62 |
| S11.3  | Competitive gene-set tests (primary analyses)                                                             | 67 |
| S11.4  | Competitive gene-set tests (secondary analyses)                                                           | 67 |
| S11.5  | Relative gene-set tests (primary analyses)                                                                | 68 |
| S11.6  | Relative gene-set tests (secondary analyses)                                                              | 69 |
| S12.1  | Attempted replication of top 16 independent PGC genome-wide significant loci in UKBB                      | 70 |

## List of Figures

|      |                                                                                                  |    |
|------|--------------------------------------------------------------------------------------------------|----|
| S1.1 | Polymorphism counts in top 18 genes (1 of 3)                                                     | 6  |
| S1.2 | Polymorphism counts in top 18 genes (2 of 3)                                                     | 7  |
| S1.3 | Polymorphism counts in top 18 genes (3 of 3)                                                     | 8  |
| S1.4 | Cumulative sums of estimated lower bounds of studies-per-gene-per-year for top 18 genes (1 of 2) | 9  |
| S1.5 | Cumulative sums of estimated lower bounds of studies-per-gene-per-year for top 18 genes (2 of 2) | 10 |

|       |                                                                                           |    |
|-------|-------------------------------------------------------------------------------------------|----|
| S3.1  | Distributions of depression phenotypes                                                    | 12 |
| S3.2  | Distributions of environmental moderator phenotypes                                       | 17 |
| S3.3  | LDSC genetic correlation estimate heatmap                                                 | 22 |
| S4.1  | Singular value threshold for design matrix                                                | 23 |
| S4.3  | Power simulations for main effect detection under measurement error regimes               | 25 |
| S4.2  | Logistic approximation of negative binomial regression power function                     | 26 |
| S4.4  | Power simulations for detection of association at rs12552 under measurement error regimes | 27 |
| S4.5  | Power simulations for interaction effect detection under measurement error regimes        | 28 |
| S4.6  | Distribution of number of replicated associations                                         | 30 |
| S11.1 | Estimated lifetime MDD diagnosis: gene-wise tests                                         | 63 |
| S11.2 | Current MDD severity: gene-wise tests                                                     | 63 |
| S11.3 | Conditional lifetime symptom count: gene-wise tests                                       | 64 |
| S11.4 | Lifetime episode count: gene-wise tests                                                   | 64 |
| S11.5 | Touchscreen probable lifetime diagnosis, ordinal classification: gene-wise tests          | 65 |
| S11.6 | Touchscreen probable lifetime diagnosis: gene-wise tests                                  | 65 |
| S11.7 | PGC lifetime diagnosis: gene-wise tests                                                   | 66 |
| S11.8 | Severe recurrent depression: gene-wise tests                                              | 66 |

## Part I

# Supplemental methods

## S1 Identification of top genes and polymorphisms

Table S1.1: Estimated lower bounds for the number of human association studies of each of the top 18 and 16 identified candidate genes and polymorphisms, respectively.

| <i>Top candidate genes</i> |               |                   |                           | <i>Top candidate polymorphisms</i> |                     |               |                   |                           |
|----------------------------|---------------|-------------------|---------------------------|------------------------------------|---------------------|---------------|-------------------|---------------------------|
|                            | <b>Gene</b>   | $\hat{N}^\dagger$ | <b>95% CI<sup>†</sup></b> |                                    | <b>Polymorphism</b> | <b>Gene</b>   | $\hat{N}^\dagger$ | <b>95% CI<sup>†</sup></b> |
| 1.                         | <i>SLC6A4</i> | 455               | 293 - 503                 | 1.                                 | 5-HTTLPR            | <i>SLC6A4</i> | 404               | 235 - 487                 |
| 2.                         | <i>BDNF</i>   | 154               | 103 - 171                 | 2.                                 | rs6265              | <i>BDNF</i>   | 154               | 103 - 171                 |
| 3.                         | <i>COMT</i>   | 93                | 58 - 112                  | 3.                                 | rs4680              | <i>COMT</i>   | 93                | 58 - 112                  |
| 4.                         | <i>HTR2A</i>  | 75                | 47 - 90                   | 4.                                 | rs6311              | <i>HTR2A</i>  | 56                | 28 - 79                   |
| 5.                         | <i>TPH1</i>   | 59                | 44 - 59                   | 5.                                 | rs1800532           | <i>TPH1</i>   | 53                | 35 - 58                   |
| 6.                         | <i>TPH2</i>   | 55                | 41 - 55                   | 6.                                 | VNTR                | <i>DRD4</i>   | 42                | 28 - 26                   |
| 7.                         | <i>DRD2</i>   | 50                | 33 - 55                   | 7.                                 | rs1800497           | <i>DRD2</i>   | 28                | 14 - 42                   |
| 8.                         | <i>MAOA</i>   | 50                | 32 - 60                   | 8.                                 | VNTR                | <i>MAOA</i>   | 25                | 11 - 45                   |
| 9.                         | <i>DRD4</i>   | 42                | 28 - 46                   | 9.                                 | $\epsilon$ -2/3/4   | <i>APOE</i>   | 24                | 16 - 32                   |
| 10.                        | <i>MTHFR</i>  | 32                | 24 - 32                   | 10.                                | rs1801133           | <i>MTHFR</i>  | 16                | 9 - 23                    |
| 11.                        | <i>APOE</i>   | 24                | 16 - 32                   | 11.                                | rs1801260           | <i>CLOCK</i>  | 16                | 11 - 20                   |
| 12.                        | <i>CLOCK</i>  | 23                | 19 - 26                   | 12.                                | VNTR                | <i>SLC6A3</i> | 14                | 10 - 18                   |
| 13.                        | <i>SLC6A3</i> | 21                | 16 - 24                   | 13.                                | in/del              | <i>ACE</i>    | 11                | 9 - 14                    |
| 14.                        | <i>ACE</i>    | 14                | 11 - 17                   | 14.                                | rs1045642           | <i>ABCB1</i>  | 8                 | 8 - 9                     |
| 15.                        | <i>DRD3</i>   | 11                | 11 - 11                   | 15.                                | rs6280              | <i>DRD3</i>   | 6                 | 6 - 7                     |
| 16.                        | <i>ABCB1</i>  | 11                | 10 - 11                   | 16.                                | rs1611115           | <i>DBH</i>    | 5                 | 5 - 6                     |
| 17.                        | <i>DTNBP1</i> | 10                | 10 - 10                   |                                    |                     |               |                   |                           |
| 18.                        | <i>DBH</i>    | 10                | 10 - 10                   |                                    |                     |               |                   |                           |

<sup>†</sup> Estimates reflect the hypergeometric parameter indicating the number of correctly identified studies among the finite population of studies identified by our algorithm (details provided below).

The open source Biopython library [1] was used to scrape titles, abstracts, and metadata from the PubMed [2] database of published scientific journal articles. We do not claim to have exhaustively examined the entire candidate gene literature; rather, we have identified 18 highly-studied candidate genes in the context of human association studies of MDD and related endophenotypes. Our estimates of the number of studies per candidate gene reflect *lower bounds* for the true numbers of studies per candidate gene. Our procedure was as follows:

1. Titles of all meta-analyses matching the PubMed search (psychology OR (psychiatry OR (neuroscience OR behavior))) AND topic = (allele OR (gene OR (polymorphism OR (genotype)))) were accessed
2. Regular expression matching was applied to determine potential gene names
3. Potential gene names occurred at least twice were hand-checked against gene names and aliases in the HUGO Gene Nomenclature Committee (HGNC) database of gene names [3, 4]
4. True matches were used to compile a dictionary of gene:[aliases] pairs using HGNC listed aliases E.g., SLC6A4: [ obsessive-compulsive disorder 1, serotonin transporter, SERT1, 5-HTT, 5-HTTLPR, OCD1 ]
5. Extracted titles and abstracts of all original research articles (as opposed to reviews/meta-analyses) published between 1991 and 2016 containing the terms DEPRESSION, MDD, DEPRESSIVE, or DEPRESSANT and the terms PSYCHOLOGY, PSYCHOLOGICAL, PSYCHIATRIC, PSYCHIATRY, PSYCHOPATHOLOGY, PSYCHOPATHOLOGICAL, BEHAVIOR, BEHAVIORAL, COGNITIVE, COGNITION, or NEUROIMAGING
6. Extensive *ad hoc* exclusion terms were applied to filter out irrelevant articles or articles not involving human subjects (e.g., “clock drawing”, which refers to a neurocognitive assessment, was excluded as to avoid mismatches with the *CLOCK* gene)
7. Titles/abstracts containing a gene name or alias for each previously identified gene-names were tallied
8. A random subset of ten articles were checked by hand for correct identification. Then, to identify polymorphisms likely to have been studied at least ten times,

- (a) The optimal coverage exact 95% hypergeometric confidence interval [5] for the true of correctly identified articles was calculated. That is, for each gene, we had a finite population of  $M$  articles identified via the above procedure. Given a random sample of  $m = 10$  identified articles containing  $k$  correctly estimated articles, we estimated the number  $N : k \leq N \leq M$  of correctly identified articles among those identified via the fact that it is a hypergeometric random variable with mass

$$P(N = n) = \frac{\binom{N}{k} \binom{M-N}{m-k}}{\binom{M}{m}}$$

- (b) If the 95% confidence interval  $[N_{lower}, N_{upper}]$  excluded 9 or 11, i.e., if

$$[N_{lower}, N_{upper}] \subset \{z \in \mathbb{N} : z \geq 10\} \vee [N_{lower}, N_{upper}] \subset \{z \in \mathbb{N} : z < 10\}$$

no more samples were drawn and the genes likely to have been studied at least 10 times were retained

- (c) Else, an additional  $k' := \max\{3, M - k\}$  samples were taken,  $k := k + k'$ , and we returned to the previous step

9. This algorithm resulted in 19 genes likely to have been studied at least 10 times. The *CACNA1C* gene, which in contrast to the other genes did not become popular until it had been implicated in a early GWAS of bipolar disorder [6], was excluded, leaving the 18 polymorphisms examined in the current investigation.
10. For each of the 18 retained genes, the individual polymorphisms studied in each of the previously sampled (correctly identified) studies were tallied (Figures S1.1, S1.2, S1.3).
11. Ad-hoc examination of the distributions of polymorphisms studied in each sample identified “top” polymorphisms in 16 of the 18 genes. There were no clear top polymorphisms in *TPH2* or in *DTNBP1*.
12. Hypergeometric parameters were estimated for each polymorphism.

We emphasize that we preregistered our analysis plan after identifying the top polymorphisms, but before running any of the association models. The top 18 candidate genes and the top 16 candidate polymorphisms are presented in table S1.1. Estimates of lower bounds for number of studies-of-genes-per-year are presented in figures S1.4 and S1.5.

Figure S1.1: Polymorphism counts in top 18 genes (1 of 3)

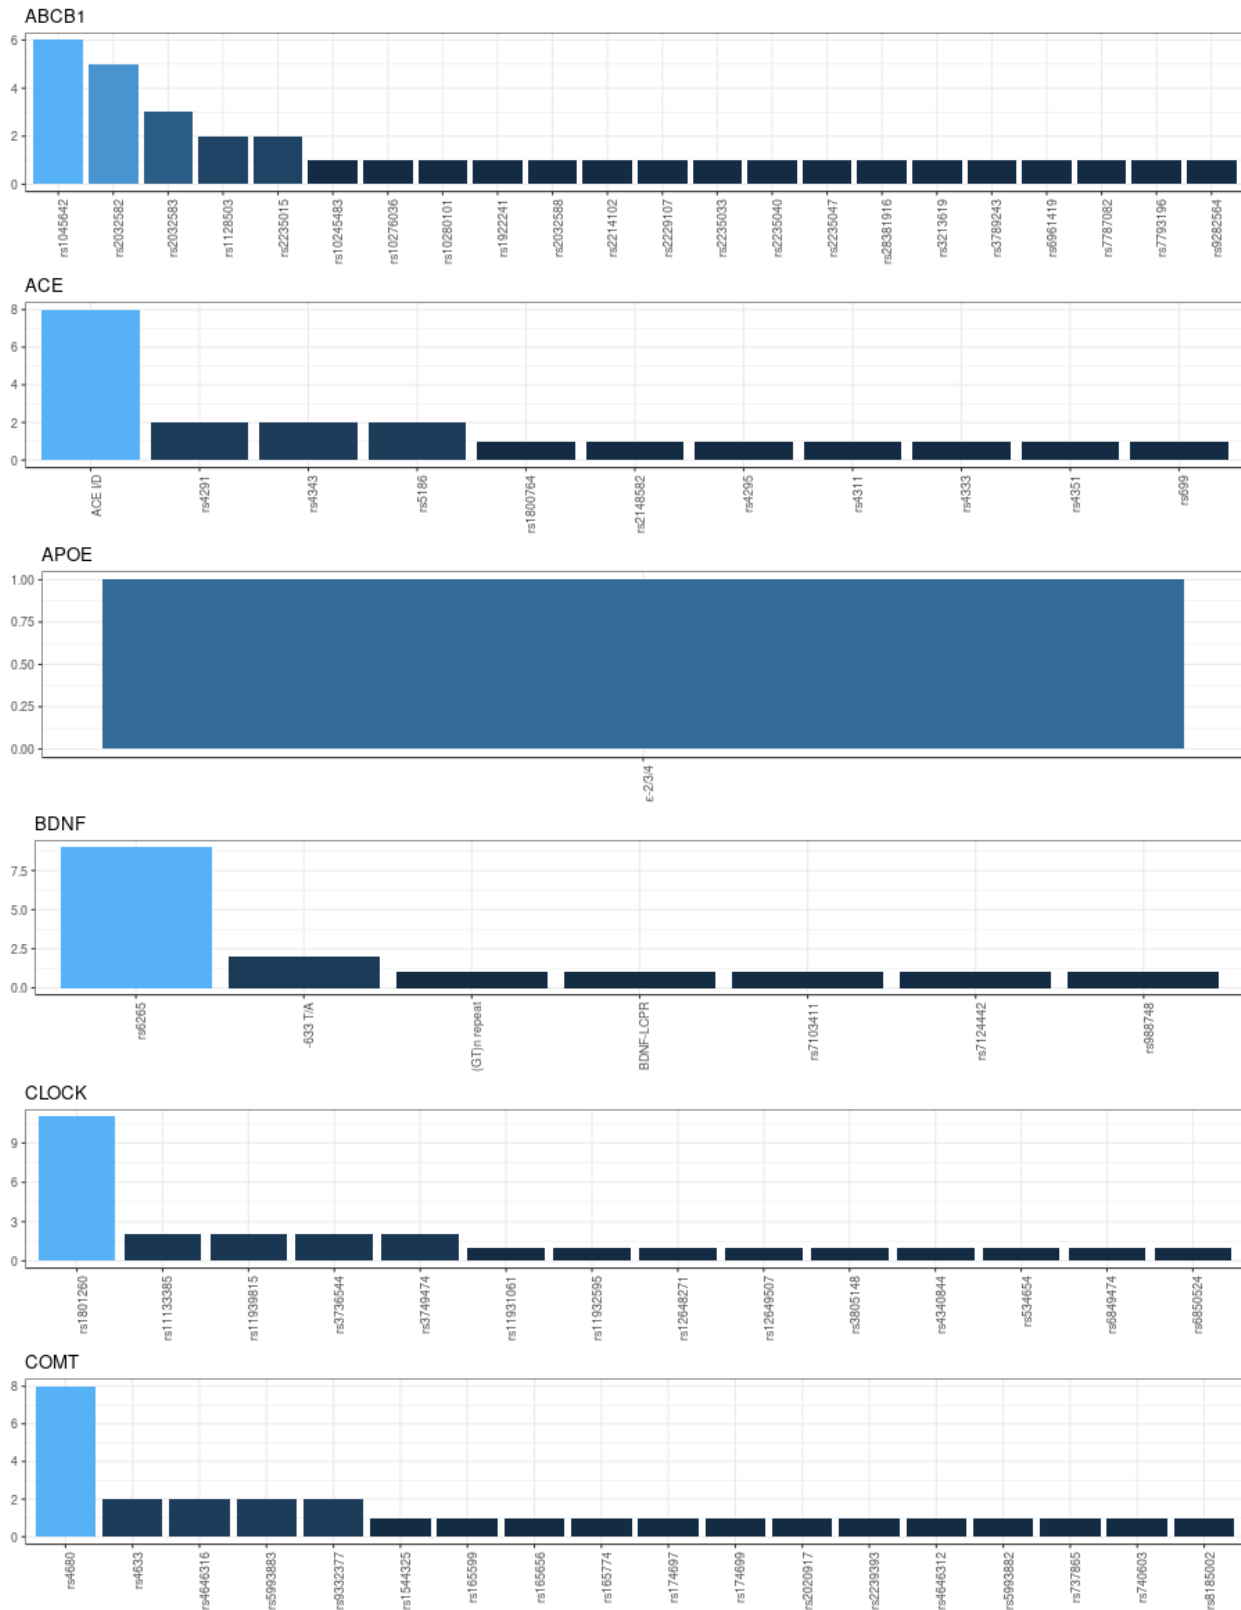

Figure S1.2: Polymorphism counts in top 18 genes (2 of 3)

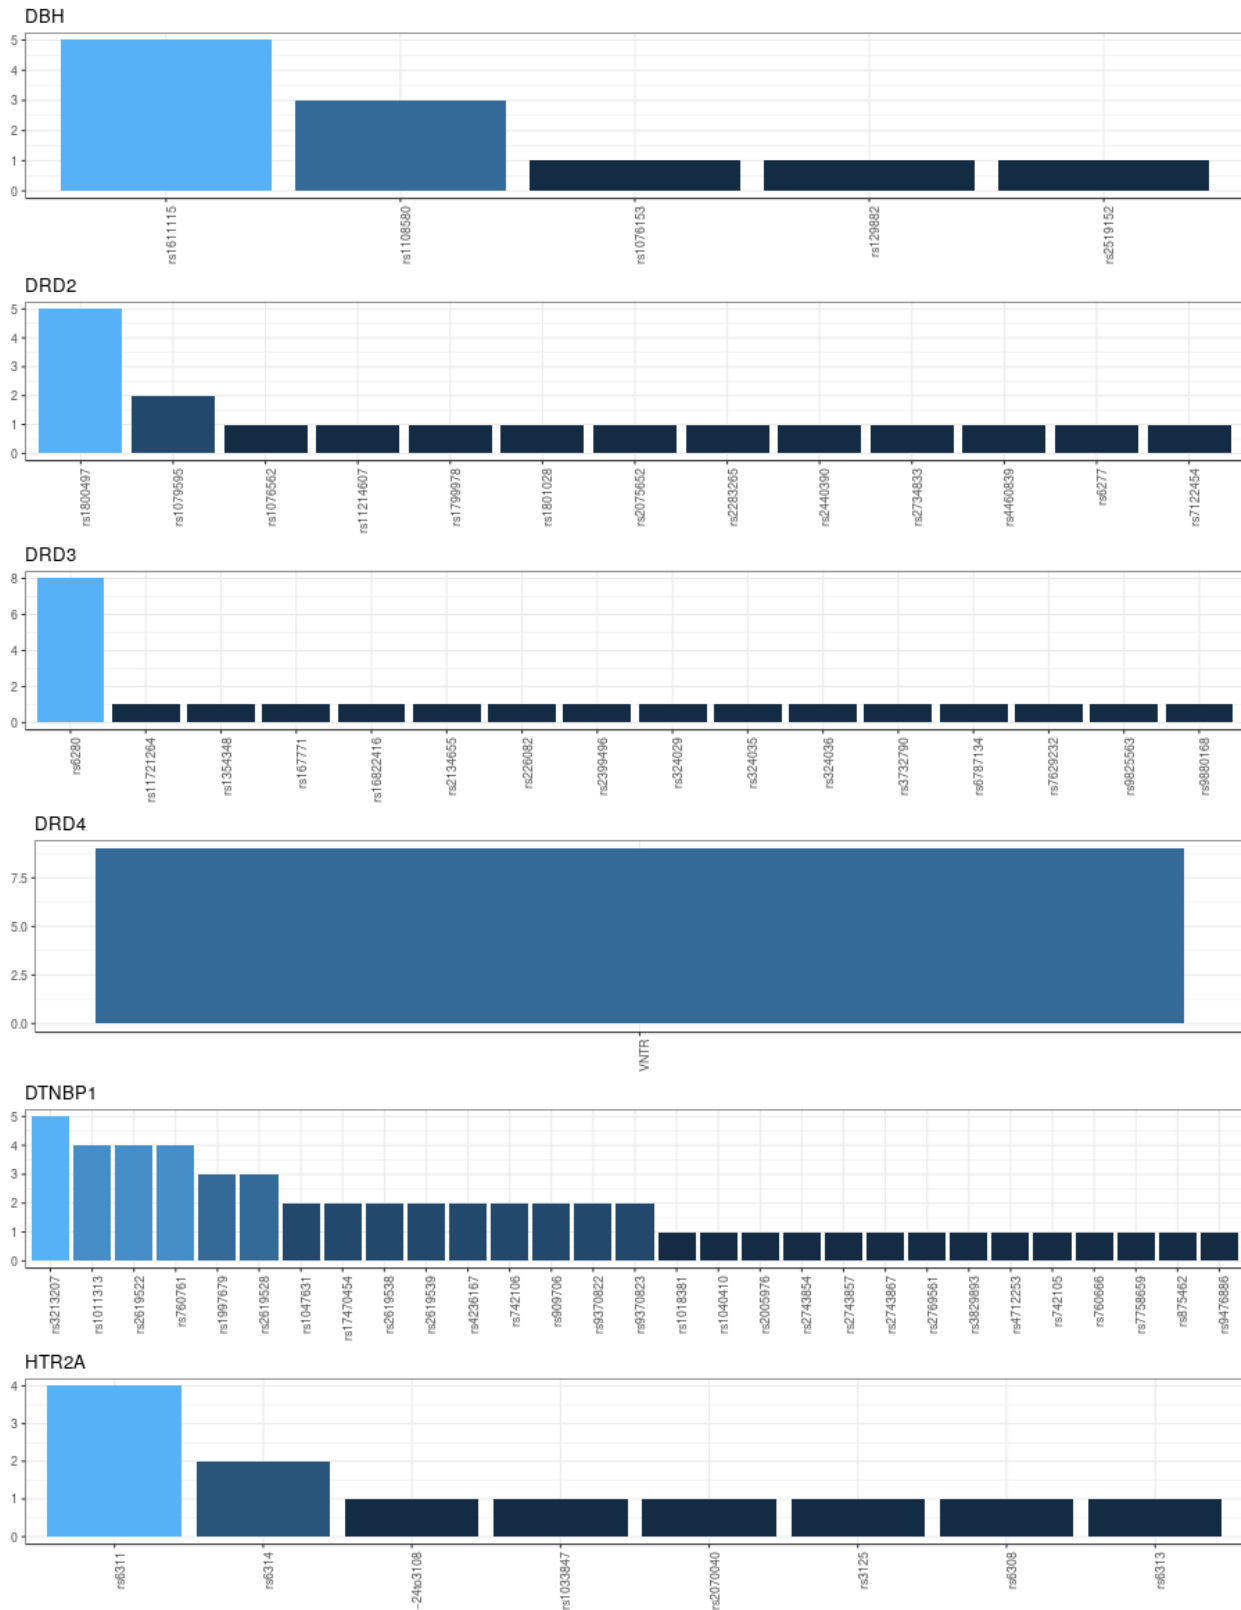

Figure S1.3: Polymorphism counts in top 18 genes (3 of 3)

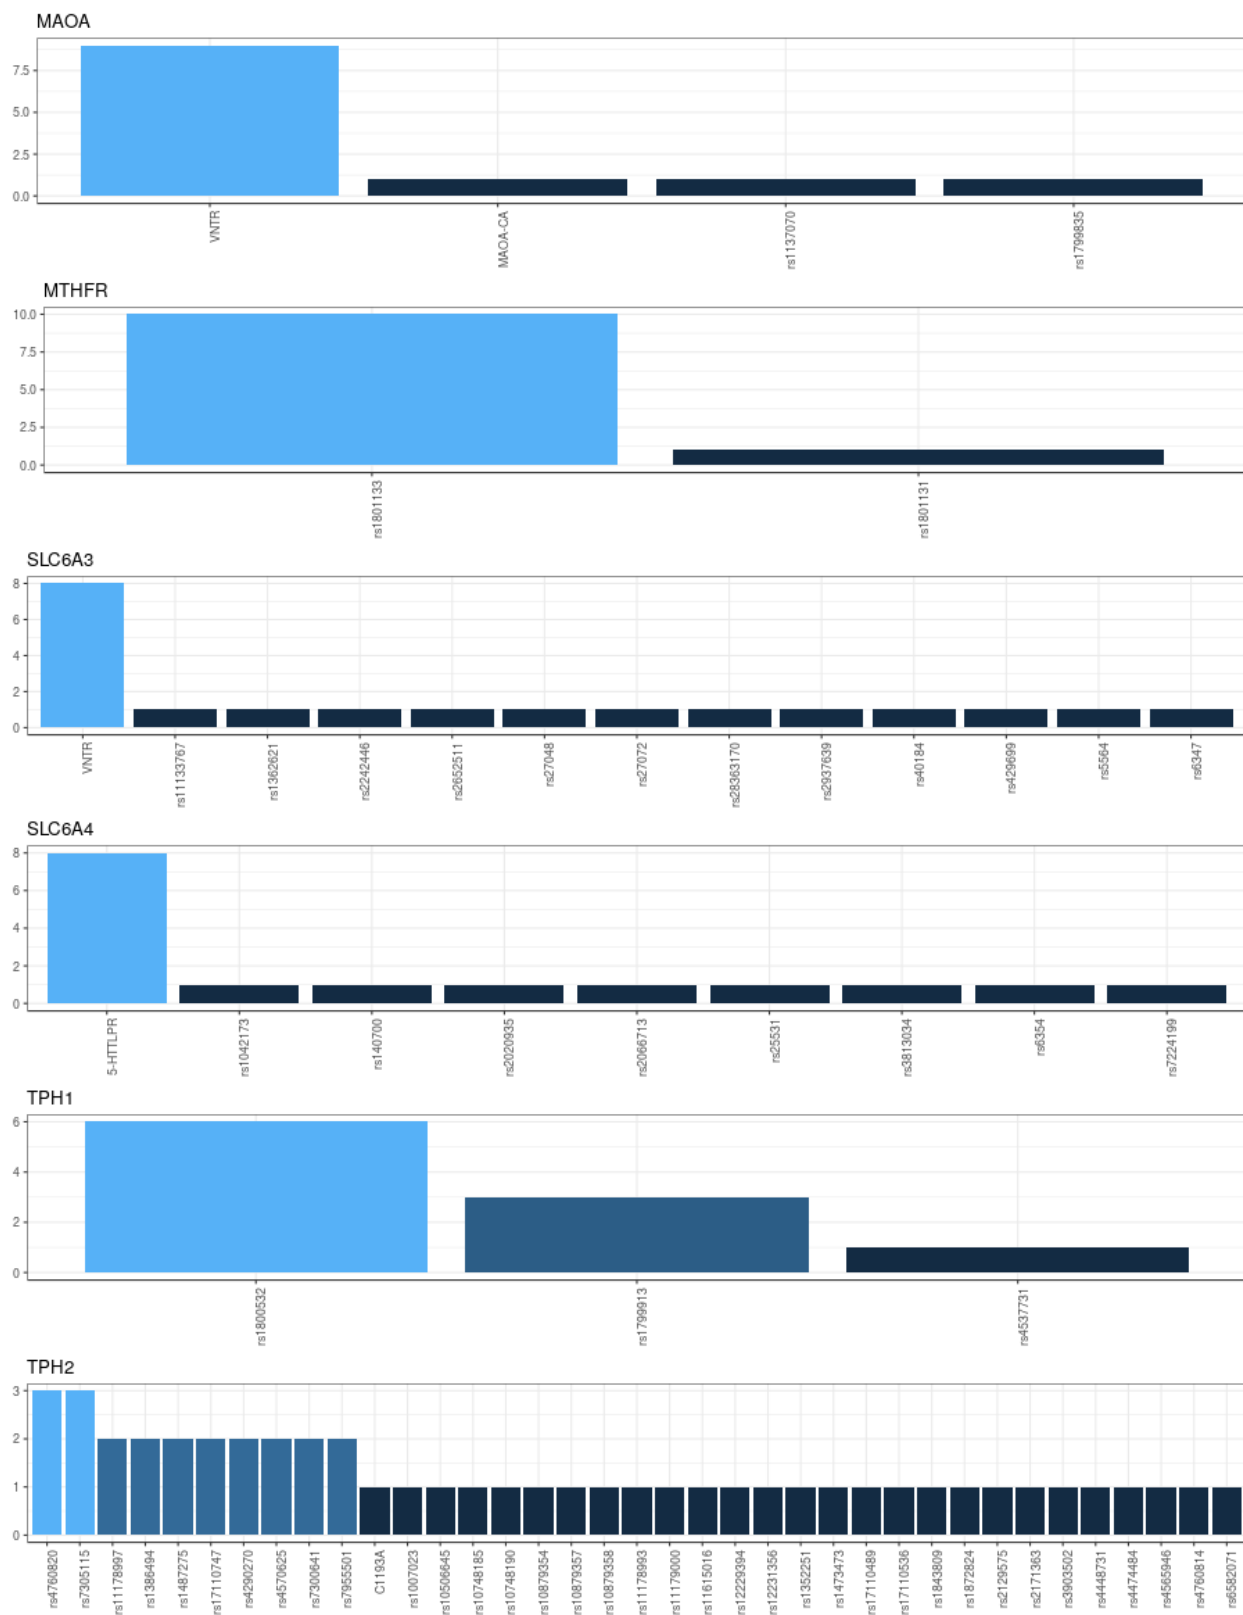



Figure S1.4: Cumulative sums of estimated lower bounds of studies-per-gene-per-year for top 18 genes (1 of 2)

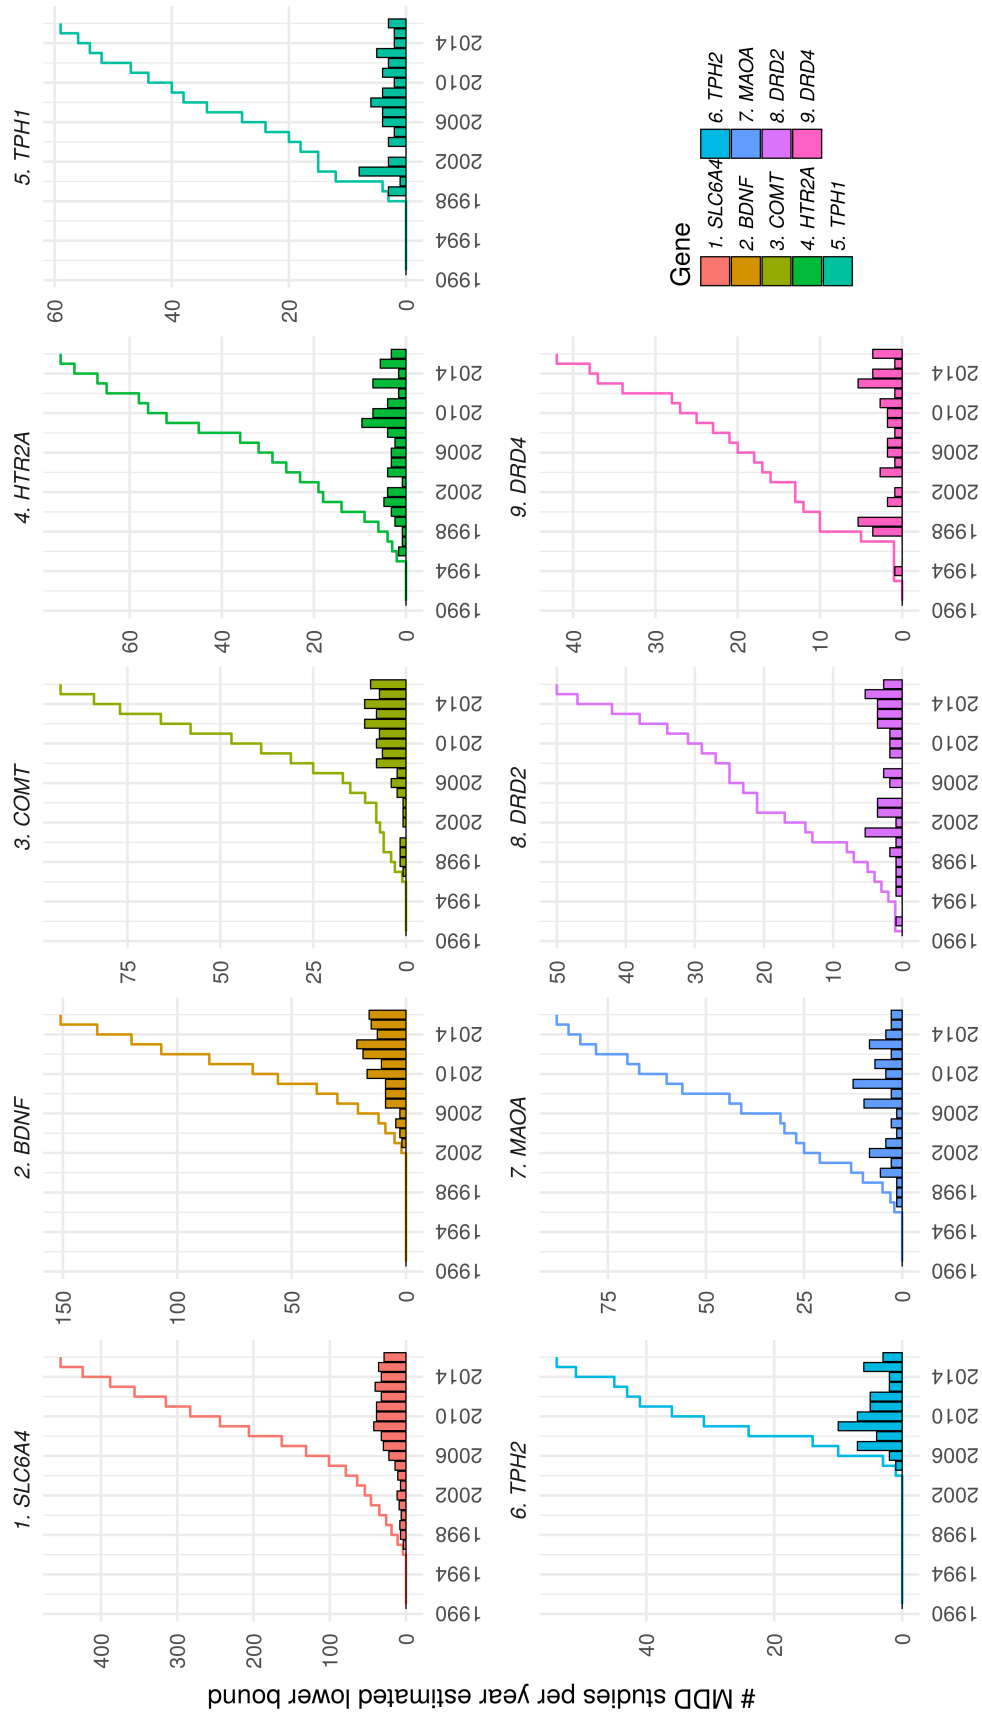

*Note.* In contrast to the total sum, estimates of studies per individual year are highly sensitive to sampling error.

Figure S1.5: Cumulative sums of estimated lower bounds of studies-per-gene-per-year for top 18 genes (2 of 2)

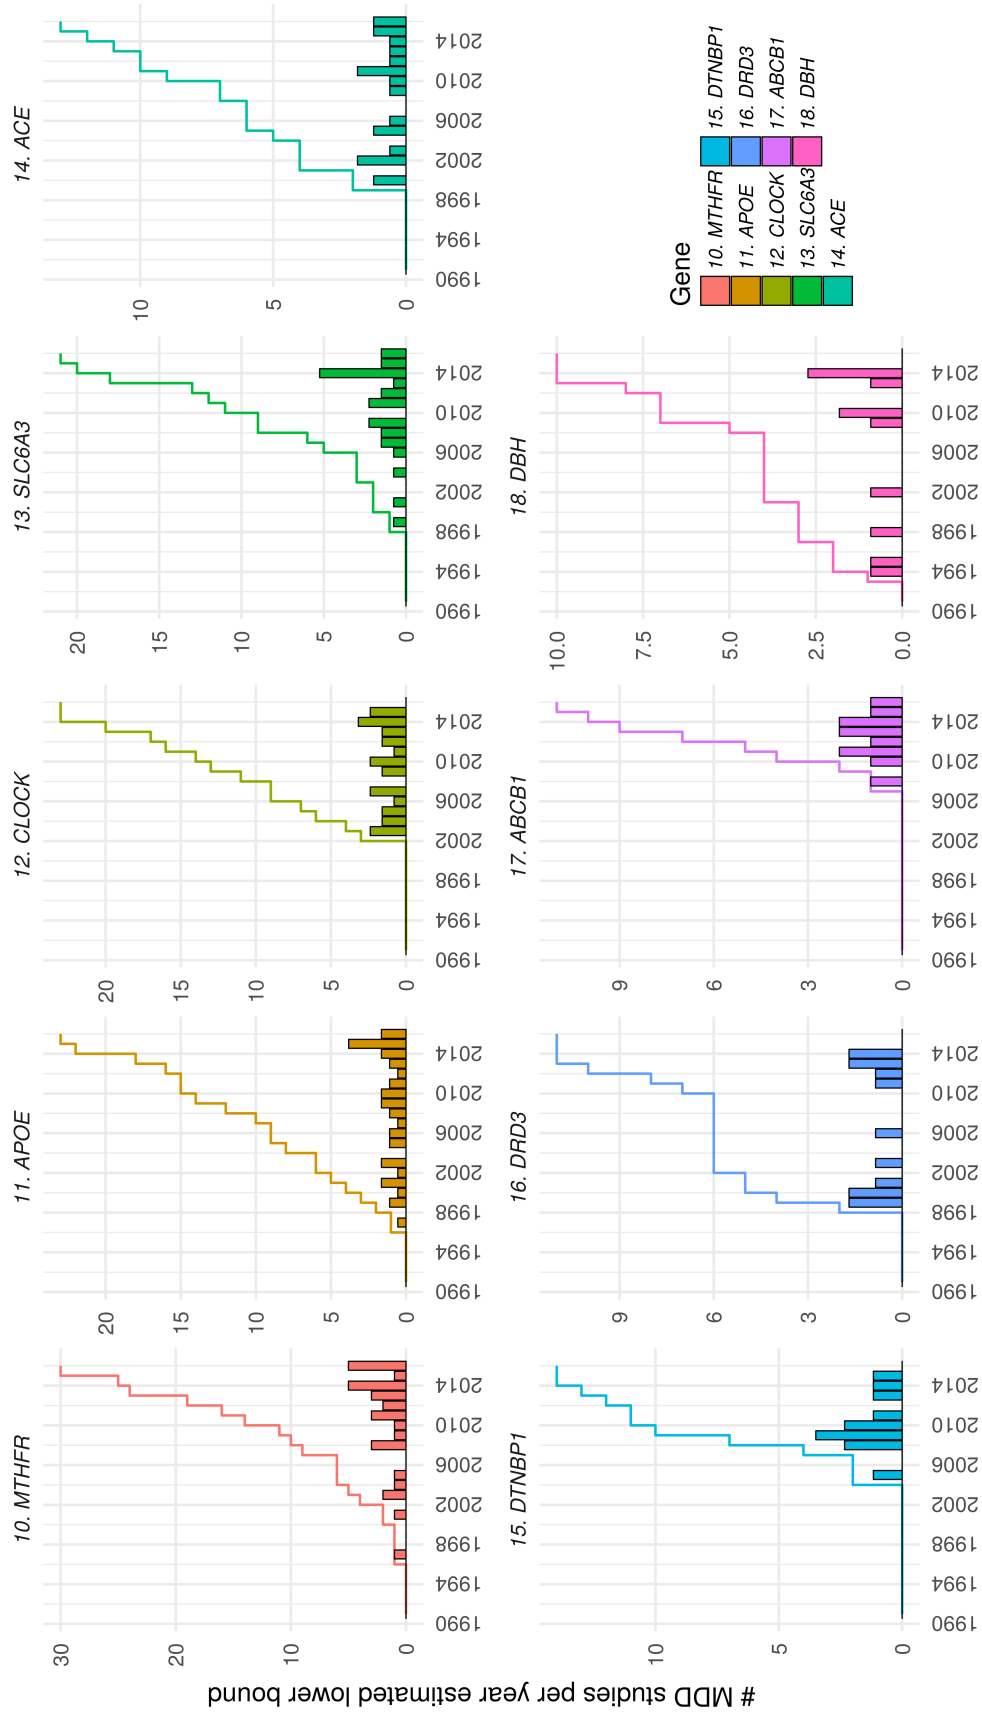

Note. In contrast to the total sum, estimates of studies per individual year are highly sensitive to sampling error.

## S2 Genotyping and quality control

### S2.1 PGC sample

Only summary statistics (as opposed to raw genotype data) were used in the analyses of the Psychiatric Genetics Consortium (PGC) data. GWAS summary statistics from the 29 anchor cohorts and the deCODE, GERA, iPSYCH, and 23andMe expanded cohorts were meta-analyzed using the METAL software [7], using an inverse variance weighting scheme. SNPs were filtered at  $MAF > 0.01$  and  $INFO > 0.8$ . Detailed descriptions of the genotyping and quality control procedures are provided in [8]. To prevent sample overlap, the UKBB and Generation Scotland cohorts were excluded, resulting in a total of 443,264 unrelated individuals (120,201 cases and 323,063 controls). Because raw genotype data were unavailable, only biallelic SNPs were included in polymorphism-level analyses (i.e., the tri-allelic *APOE*  $\epsilon$ -2/3/4 and all variable number tandem repeat [VNTR] polymorphisms were excluded). The *ACE* insertion/deletion (indel) polymorphism was determined via rs4343.

### S2.2 UKBB sample

The details of the official UK Biobank genotyping, quality-control, and imputation methods in the released data can be found in Bycroft et al., 2017 [9]. We further excluded individuals with no genetic data and those whose self-reported and genetic sex conflicted (data fields `f.31.0.0` and `f.22001.0.0`), and those identified by the UK Biobank, UKBiLEVE, and Affymetrix with poor quality (`f.220010.0.0` and `f.22051.0.0`), for a total of 486,565 individuals. To reduce the influence of population stratification in our analyses, we only used individuals of primarily European ancestry. The UK Biobank identified individuals of “Caucasian” ancestry who self-identified as “British” (`f.22006.0.0`). To these individuals we added those whose first four principal component scores (from the UK Biobank-provided sample QC file) were within the range of the UK Biobank-identified “Caucasian” individuals.

In the array data we used plink v1.9 [10, 11] to LD- and MAF-prune markers with  $|F_{het}| < 0.2$  in the European-ancestry sample (plink2 command: `--geno 0.05 --hwe 0.00000001 --maf 0.01 --indep-pairwise 50 5 0.2`), retaining 125,546 SNPs and 436,065 individuals.

Though UK-based cohorts of the PGC sample were excluded, further sample overlap was detected via the use of genetic checksums (software available here), resulting in the exclusion of an additional 338 individuals. We then estimated genomic relatedness matrices (GRMs; using the LD- and MAF-pruned array markers) separately for individuals for whom relevant items were measured in the initial touchscreen interview and those for whom relevant items were measured in the online mental health follow-up questionnaire, pruning the samples such that the maximum relatedness was 0.05 for any two individuals assessed on a given outcome. This resulted in two partially overlapping sub-samples (91,121 for the touchscreen interview outcomes and 115,458 for the online mental health follow-up outcomes) comprised of 177,950 unique individuals.

For gene-wise association analyses, we used the UK Biobank-imputed biallelic SNPs, applying the following thresholds: minor allele count of at least 3, Hardy-Weinberg p-value greater than  $10^{-6}$ , no more than 2% missing calls, and imputation INFO score of at least 0.3, retaining only the HRC-imputed SNPs.

The VNTRs in *SLC6A4*, *DRD4*, *MAOA*, and *SLC6A3*, as well as a SNP in *SLC6A4* were imputed as detailed in [12]. 5-HTTLPR activity level was determined based on the number of repeats and genotype at *SLC6A4* rs25531 as described in [13] and the *ACE* insertion/deletion (in/del) polymorphism was determined via genotype at rs4343.

Hard calls, rather than dosages, were used in all association analyses.

## S3 Measures

### S3.1 Outcome measures

Figure S3.1: Distributions of depression phenotypes

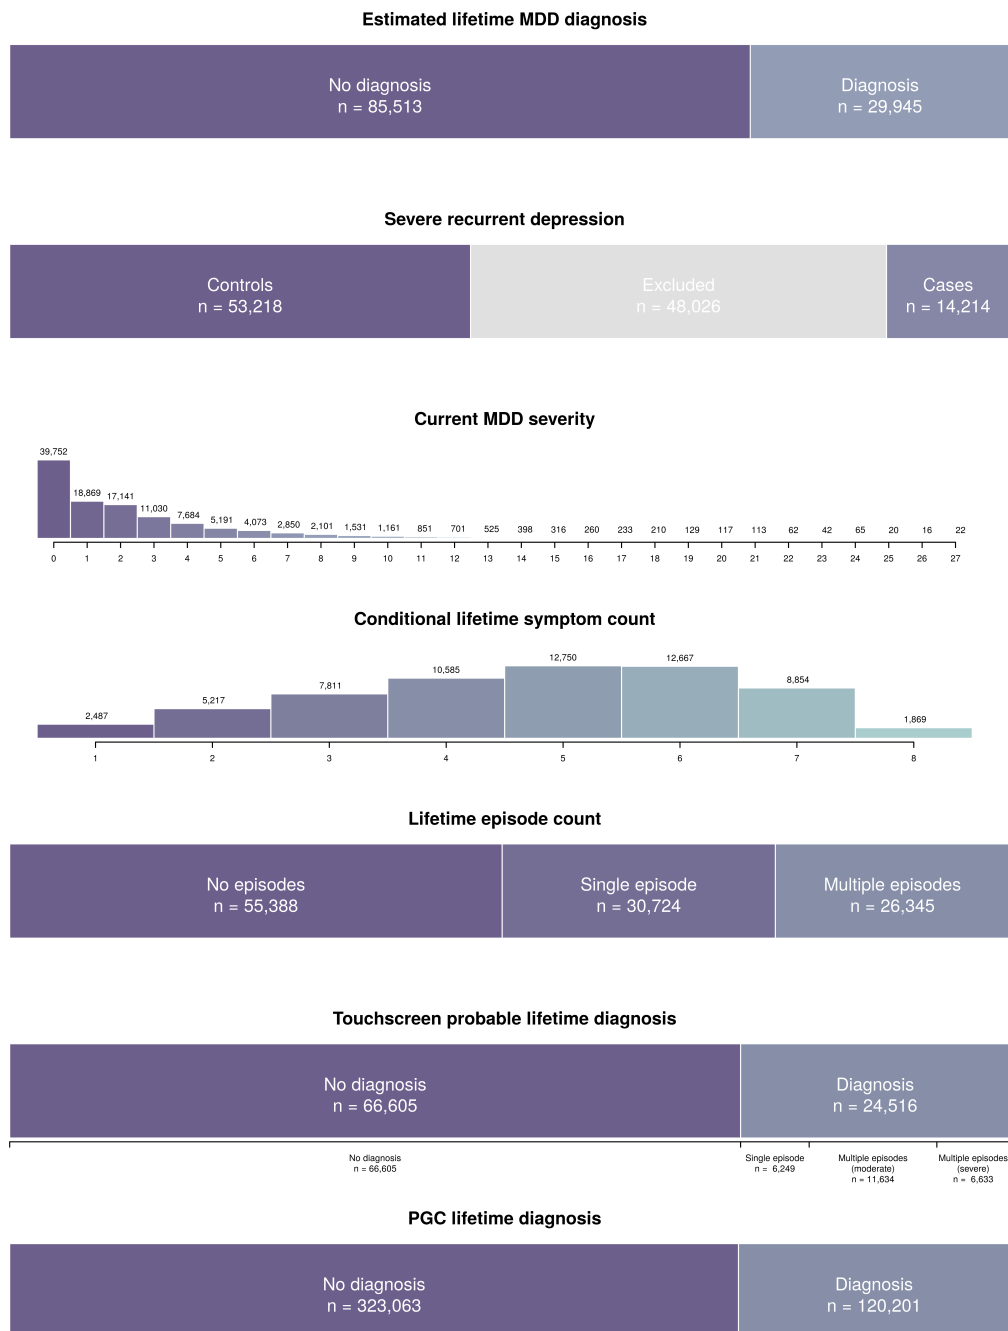

The corresponding field number is listed next to each UKBB item. With the exception of *Probable MDD, ordinal (TSI)* and *Probable MDD diagnosis (TSI)*, all psychiatric indices were derived by the authors, with details provided below.

### S3.1.1 Estimated lifetime MDD Diagnosis

To receive a diagnosis, participants had to meet all of the following criteria:

1. **Anhedonia or depressed mood.** Respondents needed to have responded affirmatively to either of the following questions. Further criteria were assessed only among individuals endorsing one of the two below criteria.

**Anhedonia** (20441) "Have you ever had a time in your life lasting two weeks or more when you lost interest in most things like hobbies, work, or activities that usually give you pleasure?"

**Mood** (20446) "Have you ever had a time in your life when you felt sad, blue, or depressed for two weeks or more in a row?"

2. **Symptom count.** Respondents needed to endorse 4 or more of the following symptoms (unfortunately, motor agitation/retardation was not assessed) with respect to their worst period of depression:

(a) **Anhedonia** (20441) "Have you ever had a time in your life lasting two weeks or more when you lost interest in most things like hobbies, work, or activities that usually give you pleasure?"

(b) **Mood** (20446) "Have you ever had a time in your life when you felt sad, blue, or depressed for two weeks or more in a row?"

(c) **Sleep** (20533, 20534, 20533) "Trouble falling asleep" or "sleeping too much" or "waking too early"

(d) **Fatigue** (20449) "Did you feel more tired out or low on energy than is usual for you?"

(e) **Appetite/weight** (20536) "Did you gain or lose weight without trying, or did you stay about the same weight?"

(f) **Feelings of worthlessness** (20450) "People sometimes feel down on themselves, no good, worthless. Did you feel this way?"

(g) **Concentration** (20435) "Did you have a lot more trouble concentrating than usual?"

(h) **Ideation** (20437) "Did you think a lot about death - either your own, someone else's, or death in general?"

3. **Frequency.** (20439) With respect to their worst period of depression, respondents had to indicate a 2 or 3 on the following scale assessing "how often [they] felt this way": {1: "Less often", 2: "Almost every day", 3: "Every day"}
4. **Fraction of day affected.** (20436) With respect to their worst period of depression, respondents had to indicate a 2 or greater on the following scale assessing "How much of the day did these feelings usually last?": {1: "Less than half of the day", 2: "About half of the day", 3: "Most of the day", 4: "All day long"}
5. **Impairment.** (20440) With respect to their worst period of depression, respondents had to indicate a 2 or greater on the following scale assessing "Think about your roles at the time of this episode, including study / employment, childcare and housework, leisure pursuits. How much did these problems interfere with your life or activities?": {0: "Not at all", 1: "A little", 2: "Somewhat", 3: "A lot"}

Individuals endorsing symptoms of mania, hallucinations, or delusions were excluded from analyses.

### S3.1.2 Conditional lifetime symptom count

Estimated MDD symptom count among UKBB online mental health follow-up respondents who endorsed anhedonia and/or depressed mood.

As the remaining symptoms described above were assessed conditionally upon endorsement of anhedonia or depressed mood, we only present symptom counts among individuals endorsing either of the two "threshold criteria". Symptom counts thus ranged from 1 to 8.

Individuals endorsing symptoms of mania, hallucinations, or delusions were excluded from analyses.

### S3.1.3 Current MDD severity

Severity of depression symptoms over the past two weeks leading up to assessment among UKBB online mental health follow-up respondents.

Measurement of this outcome differs from that of estimated MDD diagnosis in the following respects:

- Respondents ranked the severity of each symptom on a 0-4 scale rather than providing a binary endorsement
- All symptoms were assessed regardless of whether or not anhedonia or depressed mood was diagnosed.

The following items were assessed as “Over the last 2 weeks, how often have you been bothered by any of the following problems?”

1. **Anhedonia** (20510) "Little interest or pleasure in doing things"
2. **Mood** (20514) "Feeling down, depressed, or hopeless"
3. **Sleep** (20517) "Trouble falling or staying asleep, or sleeping too much"
4. **Fatigue** (20519) "Did you feel more tired out or low on energy than is usual for you?"
5. **Appetite/weight** (20511) "Poor appetite or overeating"
6. **Feelings of worthlessness** (20507) "Feeling bad about yourself or that you are a failure or have let yourself or your family down"
7. **Concentration** (20508) "Trouble concentrating on things, such as reading the newspaper or watching television"
8. **Ideation** (20513) "Thoughts that you would be better off dead or of hurting yourself in some way"

Individuals endorsing symptoms of mania, hallucinations, or delusions were excluded from analyses.

### S3.1.4 Lifetime episode count

Ordinal measure of lifetime number of depressive episodes among UKBB online mental health follow-up respondents who endorsed anhedonia and/or depressed mood (20442).

Individuals who endorsed a two week period of either anhedonia or depressed mood were asked "How many periods did you have in your life lasting two or more weeks where you felt like this?". Respondents supplied either an integer between 1 and 999 or responded “Too many to count / One episode ran into the next”, rendering counts greater than one difficult to compare. We thus assigned scores as follows:

- |   |                                                              |
|---|--------------------------------------------------------------|
| 0 | individuals who endorsed neither anhedonia or depressed mood |
| 1 | individuals who indicated a single depressive episode        |
| 2 | individuals who indicated $\geq 2$ depressive episodes       |

Individuals endorsing symptoms of mania, hallucinations, or delusions were excluded from analyses.

### S3.1.5 Touchscreen probable lifetime diagnosis, ordinal classification

Ordinal measure of lifetime depression diagnostic status assessed as part of the UKBB initial touchscreen interview (20126).

This measure has been extensively studied and is described in great detail in Smith et al., 2013 [14]. Additionally, further details are provided in <http://biobank.ctsu.ox.ac.uk/crystal/docs/MentalStatesDerivation.pdf>. Briefly, a selection items of items from the Patient Health Questionnaire [15], the Structured Clinical Interview for DSM-IV Axis I Disorders-Research Version [16, 15], and items assessing treatment seeking behavior specific to the UKBB touchscreen interview. Response were classified as follows:

- 0 No bipolar or depression
- 1 Single probable major depression episode
- 2 Probable recurrent major depression (moderate)
- 3 Probable recurrent major depression (severe)

Individuals likely to meet criteria for bipolar disorder were excluded from analyses.

### **S3.1.6 Touchscreen probable lifetime diagnosis**

Binary measure of probable depression diagnostic status assessed as part of the UKBB initial touchscreen interview (20126).

The three non-zero categories of the previous outcome were collapsed to create a dichotomous indicator of probable lifetime diagnosis. Individuals likely to meet criteria for bipolar disorder were excluded from analyses.

### **S3.1.7 Severe recurrent depression**

Binary indicator of severe recurrent MDD versus no lifetime endorsement of depressed mood and anhedonia among individuals assessed in the UKBB online mental health follow-up. This measure was utilized in a follow-up sensitivity analysis to ensure our results would not differ dramatically if a stricter case/control assignment procedure were employed.

Scores were assigned as follows:

- 0 Neither the lifetime anhedonia or depressed mood items described in [S3.1.1](#) were endorsed.
- 1 Lifetime estimated diagnosis criteria ([S3.1.1](#)) were met, five or more of the lifetime symptoms (one of which needed to be anhedonia or depressed mood; [S3.1.2](#)) were endorsed, and two or more lifetime episodes ([S3.1.4](#)) were endorsed

All other participants were excluded, as were individuals endorsing symptoms of mania, hallucinations, or delusions.

### **S3.1.8 PGC lifetime MDD diagnosis**

Binary indicator of MDD diagnostic status (see [\[8\]](#) for further details and exclusion criteria). The current investigation utilized data from the full expanded cohort meta-analysis, excepting UK-based cohorts (UKBB and Generation Scotland).

Table S3.1: Bivariate correlations between UKBB depression phenotypes

|                                                         |                                         |                             |                               |                                           |                                                         |                                                |
|---------------------------------------------------------|-----------------------------------------|-----------------------------|-------------------------------|-------------------------------------------|---------------------------------------------------------|------------------------------------------------|
| <i>Current MDD severity</i>                             | 0.381 <sup>1</sup>                      |                             |                               |                                           |                                                         |                                                |
| <i>Lifetime episode count</i>                           | 0.787 <sup>2</sup>                      | 0.395 <sup>1</sup>          |                               |                                           |                                                         |                                                |
| <i>Conditional lifetime symptom count</i>               | 0.776 <sup>1</sup>                      | 0.328 <sup>3</sup>          | 0.371 <sup>2</sup>            |                                           |                                                         |                                                |
| <i>Touchscreen probable lifetime diagnosis, ordinal</i> | 0.701 <sup>2</sup>                      | 0.344 <sup>1</sup>          | 0.720 <sup>2</sup>            | 0.464 <sup>1</sup>                        |                                                         |                                                |
| <i>Touchscreen probable lifetime diagnosis</i>          | 0.760 <sup>2</sup>                      | 0.316 <sup>1</sup>          | 0.695 <sup>2</sup>            | 0.451 <sup>1</sup>                        | †                                                       |                                                |
| <i>Severe recurrent depression</i>                      | †                                       | 0.660 <sup>2</sup>          | ‡                             | ‡                                         | 0.896 <sup>2</sup>                                      | 0.714 <sup>2</sup>                             |
|                                                         | <i>Estimated lifetime MDD diagnosis</i> | <i>Current MDD severity</i> | <i>Lifetime episode count</i> | <i>Conditional lifetime symptom count</i> | <i>Touchscreen probable lifetime diagnosis, ordinal</i> | <i>Touchscreen probable lifetime diagnosis</i> |

<sup>1</sup>Polychoric, <sup>2</sup>polyserial, and <sup>3</sup>Pearson correlations between depression phenotypes in the UKBB based on pairwise complete observations. Touchscreen items were measured at a different time point than the other items. †Severe recurrent depression is a refinement of estimated lifetime MDD diagnosis, as is the ordinal classification of touchscreen probable lifetime diagnosis with respect to its binary counterpart—the agreement of these variables is necessarily perfect. ‡By definition, controls for severe recurrent depression had zero lifetime symptoms (or episodes) and cases had multiple episodes.

Table S3.2: Cohen’s  $\kappa$  (inter-rater reliability) between UKBB diagnosis phenotypes

|                                                |                                                |
|------------------------------------------------|------------------------------------------------|
| <i>Touchscreen probable lifetime diagnosis</i> | 0.517                                          |
| <i>Severe recurrent depression</i>             | †                                              |
|                                                | 0.903                                          |
|                                                | <i>Estimated lifetime MDD diagnosis</i>        |
|                                                | <i>Touchscreen probable lifetime diagnosis</i> |

Cohen’s  $\kappa$  statistics for UKBB binary MDD diagnosis phenotypes based on pairwise complete observations. Note that the estimate for touchscreen probable lifetime diagnosis is likely biased upwards as the severe recurrent depression phenotype has more restrictive criteria for both cases and controls and only pairwise-complete data contributed were used in generating the estimate. †Severe recurrent depression is a refinement of estimated lifetime MDD diagnosis—agreement is necessarily perfect.



### S3.2 Moderators

Figure S3.2: Distributions of environmental moderator phenotypes

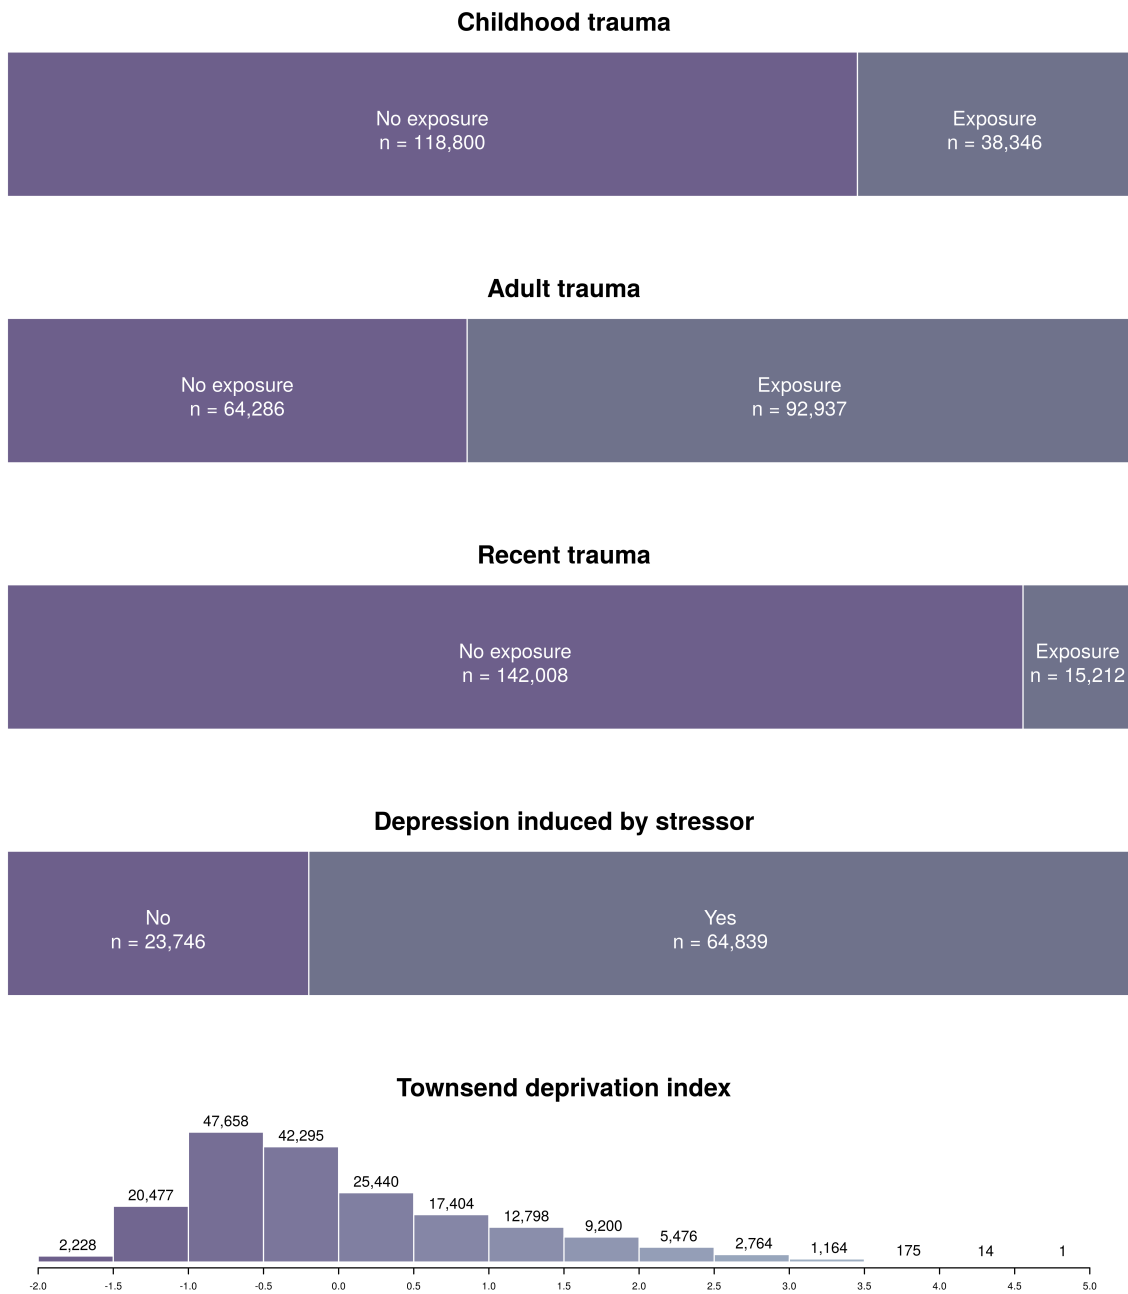

Note: Graphs above reflect participants for whom any of the depression phenotypes described in S3.1 were available.

#### S3.2.1 Childhood trauma

Binary indicator of trauma during childhood assessed among UKBB online mental health follow-up respondents. Participants were given a positive indication if they endorsed either of the following items:

**Physical abuse** (20488) "When I was growing up... People in my family hit me so hard that it left me with bruises

or marks"

**Sexual abuse** (20490) "When I was growing up... Someone molested me (sexually)"

### S3.2.2 Adult trauma

Binary indicator of trauma during adulthood assessed among UKBB online mental health follow-up respondents. Participants were given a positive indication if they endorsed any of the following items:

**Physical assault** (20529) "In your life, have you...? Been attacked, mugged, robbed, or been the victim of a physically violent crime"

**Sexual assault** (20531) "In your life, have you...? Been a victim of a sexual assault, whether by a stranger or someone you knew"

**Physical assault by partner** (20523) "Since I was sixteen... A partner or ex-partner deliberately hit me or used violence in any other way"

**Sexual assault by partner** (20524) "Since I was sixteen... A partner or ex-partner sexually interfered with me, or forced me to have sex against my wishes"

**Violence** (20530) "In your life, have you...? Witnessed a sudden violent death (eg. murder, suicide, aftermath of an accident)"

**Illness** (20528) "In your life, have you...? Been diagnosed with a life-threatening illness"

**Accident** (20526) "In your life, have you...? Been in a serious accident that you believed to be life-threatening at the time"

**War** (20527) "In your life, have you...? Been involved in combat or exposed to a war-zone (either in the military or as a civilian)"

### S3.2.3 Recent trauma

Binary indicator of trauma during the previous twelve months leading up to assessment among UKBB online mental health follow-up respondents.

Participants were given a positive indication if they answered "yes, within the last 12 months" to any of the following items (only the below were assessed for incidence in the past year):

**Physical assault** (20529) "In your life, have you...? Been attacked, mugged, robbed, or been the victim of a physically violent crime"

**Sexual assault** (20531) "In your life, have you...? Been a victim of a sexual assault, whether by a stranger or someone you knew"

**Violence** (20530) "In your life, have you...? Witnessed a sudden violent death (eg. murder, suicide, aftermath of an accident)"

**Illness** (20528) "In your life, have you...? Been diagnosed with a life-threatening illness"

**Accident** (20526) "In your life, have you...? Been in a serious accident that you believed to be life-threatening at the time"

**War** (20527) "In your life, have you...? Been involved in combat or exposed to a war-zone (either in the military or as a civilian)"

### S3.2.4 Stressor-induced depression

Binary indicator of whether period of depressed mood or anhedonia was a possible consequence of a traumatic event assessed among UKBB online mental health follow-up respondents who endorsed anhedonia and/or depressed mood (20447).

Participants were given a positive indication if they answered “yes” to "Did this worst period start within two months of the death of someone close to you or after a stressful or traumatic event in your life?".

### S3.2.5 Townsend deprivation index (TDI)

Widely-used measure of adverse socioeconomic circumstances assessed during the UKBB initial touchscreen interview (189) [17]. Higher values indicate greater adversity.

## S4 Statistical models

### S4.1 Polymorphism-wise analyses

For each polymorphism outcome  $Y$  we fit a generalized linear model (GLM) of the form

$$\text{Main effect model : } Y = g^{-1} \left( \alpha + \beta_G G + \sum_{C \in \text{Covariates}} [\beta_C C] \right)$$

where  $g$  is the link function implied by S4.1. Covariates for all models included age, age<sup>2</sup>, sex, assessment center, genotyping batch, and the first ten European ancestry principle components.

Additionally, for the combinations of outcomes  $Y$  and moderators  $E$  listed in S4.1, we fit the following interaction GLMs for each polymorphism:

**Interaction model :**

$$Y = g^{-1} \left( \alpha + \beta_G G + \beta_E E + \beta_{G \times E} G \times E + \sum_{C \in \text{Covariates}} [\beta_C C + \beta_{C \times E} C \times E + \beta_{C \times G} C \times G] \right)$$

**Interaction model :**  
(alternate scale)

$$Y = h^{-1} \left( \alpha + \beta_G G + \beta_E E + \beta_{G \times E} G \times E + \sum_{C \in \text{Covariates}} [\beta_C C + \beta_{C \times E} C \times E + \beta_{C \times G} C \times G] \right)$$

**Interaction model :**  
(improper control)

$$Y = g^{-1} \left( \alpha + \beta_G G + \beta_E E + \beta_{G \times E} G \times E + \sum_{C \in \text{Covariates}} [\beta_C C] \right)$$

The *alternate scale* model assesses for interaction effects on the multiplicative scale for outcomes primarily assessed on the additive scale and vice-versa. E.g., MDD diagnosis, which is analyzed via logistic regression in our primary analyses, is reanalyzed using ordinary least squares.

The first two models control for all covariate- and variant-by-polymorphism interactions as is necessary to avoid potential confounding [18, 19], but as is rarely employed in candidate gene-by-interaction research [20]. For the latter reason, we also present the results from the *improper control* interaction models.

Table S3.3: LDSC genetic correlation estimates among depression phenotypes, height, and type 2 diabetes

| <i>Trait 1</i>                                                 | <i>Trait 2</i>                                                 | $r_g$  | se     | $p$       |
|----------------------------------------------------------------|----------------------------------------------------------------|--------|--------|-----------|
| Touchscreen probable lifetime diagnosis                        | Severe recurrent MDD <sup>‡</sup>                              | 0.929  | 0.0670 | 1.08e-43  |
| Estimated lifetime MDD diagnosis                               | Touchscreen probable lifetime diagnosis                        | 0.939  | 0.0821 | 2.83e-30  |
| Estimated lifetime MDD diagnosis                               | Severe recurrent MDD <sup>‡</sup>                              | 0.940  | 0.0274 | 3.08e-258 |
| PGC lifetime MDD diagnosis                                     | Estimated lifetime MDD diagnosis                               | 0.855  | 0.0535 | 2.08e-57  |
| PGC lifetime MDD diagnosis                                     | Touchscreen probable lifetime diagnosis                        | 0.822  | 0.0490 | 2.81e-63  |
| PGC lifetime MDD diagnosis                                     | Severe recurrent MDD <sup>‡</sup>                              | 0.885  | 0.0492 | 2.21e-72  |
| Type 2 diabetes (DIAGRAM consortium)                           | PGC lifetime MDD diagnosis                                     | 0.036  | 0.0374 | 0.339     |
| Type 2 diabetes (DIAGRAM consortium)                           | Estimated lifetime MDD diagnosis                               | 0.077  | 0.0762 | 0.314     |
| Type 2 diabetes (DIAGRAM consortium)                           | Touchscreen probable lifetime diagnosis                        | 0.074  | 0.0784 | 0.344     |
| Type 2 diabetes (DIAGRAM consortium)                           | Severe recurrent MDD <sup>‡</sup>                              | -0.052 | 0.0727 | 0.476     |
| Height (GIANT consortium)                                      | Type 2 diabetes (DIAGRAM consortium)                           | -0.010 | 0.0392 | 0.809     |
| Height (GIANT consortium)                                      | PGC lifetime MDD diagnosis                                     | -0.026 | 0.0186 | 0.167     |
| Height (GIANT consortium)                                      | Estimated lifetime MDD diagnosis                               | -0.023 | 0.0332 | 0.485     |
| Height (GIANT consortium)                                      | Touchscreen probable lifetime diagnosis                        | -0.088 | 0.0344 | 0.011     |
| Height (GIANT consortium)                                      | Severe recurrent MDD <sup>‡</sup>                              | -0.028 | 0.0334 | 0.410     |
| Touchscreen probable lifetime diagnosis (ordinal) <sup>†</sup> | Height (GIANT consortium)                                      | -0.081 | 0.0326 | 0.013     |
| Touchscreen probable lifetime diagnosis (ordinal) <sup>†</sup> | Type 2 diabetes (DIAGRAM consortium)                           | 0.096  | 0.0738 | 0.194     |
| Touchscreen probable lifetime diagnosis (ordinal) <sup>†</sup> | PGC lifetime MDD diagnosis                                     | 0.801  | 0.0455 | 1.94e-69  |
| Touchscreen probable lifetime diagnosis (ordinal) <sup>†</sup> | Estimated lifetime MDD diagnosis                               | 0.922  | 0.0787 | 1.16e-31  |
| Touchscreen probable lifetime diagnosis (ordinal) <sup>†</sup> | Touchscreen probable lifetime diagnosis                        | 1.003  | 0.0066 | 0.000     |
| Touchscreen probable lifetime diagnosis (ordinal) <sup>†</sup> | Severe recurrent MDD <sup>‡</sup>                              | 0.926  | 0.0637 | 5.90e-48  |
| Lifetime episode count <sup>†</sup>                            | Touchscreen probable lifetime diagnosis (ordinal) <sup>†</sup> | 0.867  | 0.0560 | 4.75e-54  |
| Lifetime episode count <sup>†</sup>                            | Height (GIANT consortium)                                      | -0.036 | 0.0311 | 0.252     |
| Lifetime episode count <sup>†</sup>                            | Type 2 diabetes (DIAGRAM consortium)                           | -0.124 | 0.0703 | 0.077     |
| Lifetime episode count <sup>†</sup>                            | PGC lifetime MDD diagnosis                                     | 0.815  | 0.0401 | 1.02e-91  |
| Lifetime episode count <sup>†</sup>                            | Estimated lifetime MDD diagnosis                               | 0.948  | 0.0350 | 4.74e-161 |
| Lifetime episode count <sup>†</sup>                            | Touchscreen probable lifetime diagnosis                        | 0.845  | 0.0592 | 3.60e-46  |
| Lifetime episode count <sup>†</sup>                            | Severe recurrent MDD <sup>‡</sup>                              | 1.017  | 0.0190 | 0.000     |
| Current MDD severity <sup>†</sup>                              | Lifetime episode count <sup>†</sup>                            | 0.681  | 0.0457 | 2.52e-50  |
| Current MDD severity <sup>†</sup>                              | Touchscreen probable lifetime diagnosis (ordinal) <sup>†</sup> | 0.621  | 0.0529 | 7.32e-32  |
| Current MDD severity <sup>†</sup>                              | Height (GIANT consortium)                                      | 0.001  | 0.0357 | 0.974     |
| Current MDD severity <sup>†</sup>                              | Type 2 diabetes (DIAGRAM consortium)                           | 0.207  | 0.0677 | 2.24e-3   |
| Current MDD severity <sup>†</sup>                              | PGC lifetime MDD diagnosis                                     | 0.675  | 0.0381 | 2.29e-70  |
| Current MDD severity <sup>†</sup>                              | Estimated lifetime MDD diagnosis                               | 0.641  | 0.0652 | 7.89e-23  |
| Current MDD severity <sup>†</sup>                              | Touchscreen probable lifetime diagnosis                        | 0.618  | 0.0572 | 3.53e-27  |
| Current MDD severity <sup>†</sup>                              | Severe recurrent MDD <sup>‡</sup>                              | 0.704  | 0.0514 | 1.21e-42  |
| Conditional lifetime symptom count <sup>†</sup>                | Current MDD severity <sup>†</sup>                              | 0.689  | 0.0753 | 5.85e-20  |
| Conditional lifetime symptom count <sup>†</sup>                | Lifetime episode count <sup>†</sup>                            | 0.646  | 0.0763 | 2.77e-17  |
| Conditional lifetime symptom count <sup>†</sup>                | Touchscreen probable lifetime diagnosis (ordinal) <sup>†</sup> | 0.676  | 0.0830 | 3.85e-16  |
| Conditional lifetime symptom count <sup>†</sup>                | Height (GIANT consortium)                                      | -0.010 | 0.0431 | 0.812     |
| Conditional lifetime symptom count <sup>†</sup>                | Type 2 diabetes (DIAGRAM consortium)                           | 0.256  | 0.0861 | 2.93e-3   |
| Conditional lifetime symptom count <sup>†</sup>                | PGC lifetime MDD diagnosis                                     | 0.636  | 0.0594 | 9.36e-27  |
| Conditional lifetime symptom count <sup>†</sup>                | Estimated lifetime MDD diagnosis                               | 0.695  | 0.0675 | 6.95e-25  |
| Conditional lifetime symptom count <sup>†</sup>                | Touchscreen probable lifetime diagnosis                        | 0.683  | 0.0877 | 6.80e-15  |
| Conditional lifetime symptom count <sup>†</sup>                | Severe recurrent MDD <sup>‡</sup>                              | 0.695  | 0.0652 | 1.41e-26  |

LD score regression genetic correlation estimates on the liability scale. Details of the estimation procedure are given in S4.4.

<sup>†</sup>It is uncertain how to properly account for sample ascertainment for these non-binary phenotypes. These estimates should be interpreted with caution. <sup>‡</sup>As the severe recurrent MDD phenotype was constructed by excluding cases and controls with mild or moderate MDD symptoms, we were unable to translate these estimates to the liability scale.

Table S3.4: LDSC heritability estimates on the liability scale

| Trait                                                          | $h_{\text{liability}}^2$ | se    |
|----------------------------------------------------------------|--------------------------|-------|
| Estimated lifetime MDD diagnosis                               | 0.057                    | 0.007 |
| Current MDD severity <sup>†</sup>                              | 0.059                    | 0.005 |
| Conditional lifetime symptom count <sup>†</sup>                | 0.052                    | 0.008 |
| Lifetime episode count <sup>†</sup>                            | 0.059                    | 0.005 |
| Touchscreen probable lifetime diagnosis                        | 0.090                    | 0.008 |
| Touchscreen probable lifetime diagnosis (ordinal) <sup>†</sup> | 0.065                    | 0.006 |
| Severe recurrent MDD <sup>‡</sup>                              | 0.075                    | 0.008 |
| PGC lifetime MDD diagnosis                                     | 0.085                    | 0.004 |
| Type 2 diabetes (DIAGRAM consortium)                           | 0.342                    | 0.018 |
| Height (GIANT consortium)                                      | 0.120                    | 0.013 |

LD score regression heritability estimates on the liability scale. Details of the estimation procedure are given in S4.4. <sup>†</sup>It is uncertain how to properly account for sample ascertainment for these non-binary phenotypes. These estimates should be interpreted with caution. <sup>‡</sup>As the severe recurrent MDD phenotype was constructed by excluding cases and controls with mild or moderate MDD symptoms, we were unable to translate these estimates to the liability scale.

#### S4.1.1 Design matrix lower rank approximation

Because many variables were only available for a subset of UKBB participants, including fixed effects of both genotyping batch and assessment center (which were crossed with one another) resulted in high multicollinearity such that the design matrix was no longer of full column rank. This caused difficulty in model fitting, which we avoided by using the following lower rank approximate design matrix:

In the case of the main effect models, if the complete design matrix was of the form

$$D = \left( \begin{array}{ccc|c} x_{11} & \dots & x_{1p} & g_1 \\ \vdots & & \vdots & \vdots \\ x_{n1} & \dots & x_{np} & g_n \end{array} \right) \equiv (X \quad g)$$

with  $g$  the genotype vector for  $n$  participants and  $X$  the matrix of  $p$  covariates with rank  $r < p$ , we computed the “skinny” SVD:

$$X = U \Sigma V^*$$

$n \times r \times r \times p$

and constructed a lower rank approximation to  $X$  via

$$X' \equiv U \Sigma \in \mathbb{R}^{n \times p}$$

such that

$$\text{span col} X' = \text{span col} X$$

In model fitting, the previous design matrix was then replaced by

$$D' \equiv (X' \quad g)$$

or, in the case of the interaction models, by

$$D' \equiv \left( \begin{array}{cccccccccccc} x_{11} & \dots & x_{1r} & g_1 x_{11} & \dots & g_1 x_{1r} & e_1 x_{11} & \dots & e_1 x_{1r} & g_1 & e_1 & g_1 \cdot e_1 \\ \vdots & & \vdots & \vdots & & \vdots & \vdots & & \vdots & \vdots & \vdots & \vdots \\ x_{n1} & \dots & x_{nr} & g_n x_{n1} & \dots & g_n x_{nr} & e_n x_{n1} & \dots & e_n x_{nr} & g_n & e_n & g_n \cdot e_n \end{array} \right)$$

where  $e$  is the environmental moderator.

Figure S3.3: LDSC genetic correlation estimate heatmap

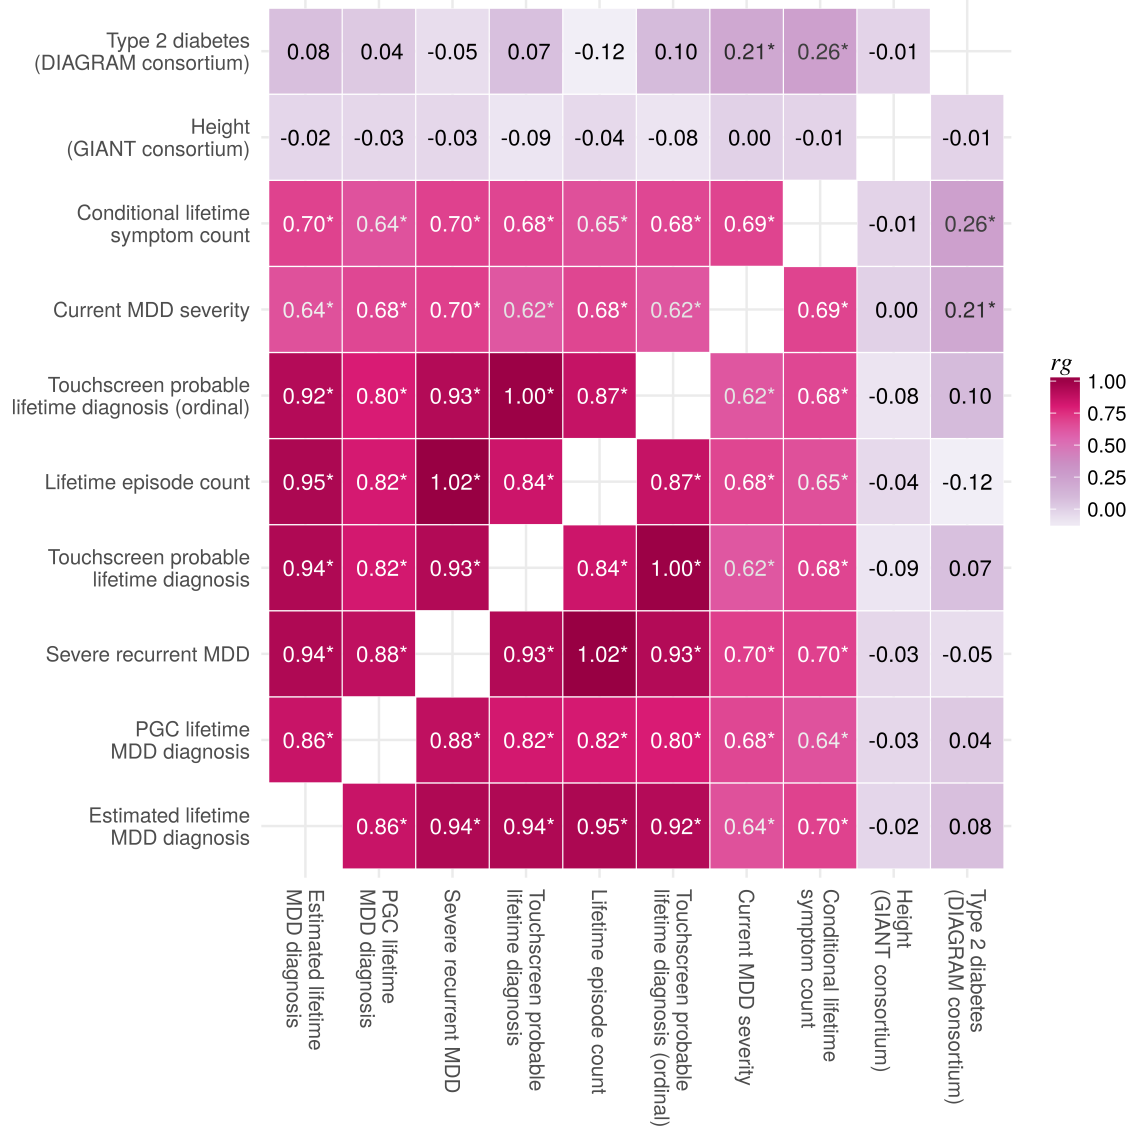

LD score regression genetic correlation estimates on the liability scale. Details of the estimation procedure are given in S4.4. Estimates for lifetime episode count, current MDD severity, conditional lifetime symptom count, and the ordinal classification of touchscreen probable lifetime diagnosis should be interpreted with caution as it's uncertain how to properly account for sample ascertainment for these non-binary phenotypes. As the severe recurrent MDD phenotype was constructed by excluding cases and controls with mild or moderate MDD symptoms, we were unable to translate these estimates to the liability scale. \*Significant at  $\alpha = .01$

In practice, of course, the trailing singular values  $\sigma_{r+1}, \dots, \sigma_p$  are not exactly zero but are very small, in which case, by the Eckart-Young-Mirsky theorem,  $X'$  is the optimal rank  $r$  approximation of  $X$  with respect to both the spectral and Frobenius norms [21]. In practice, we chose  $\epsilon$  such that

$$\sigma_k > \epsilon \text{ only for } k = 1, \dots, r$$

as pictured in S4.1.

Figure S4.1: Singular value threshold for design matrix

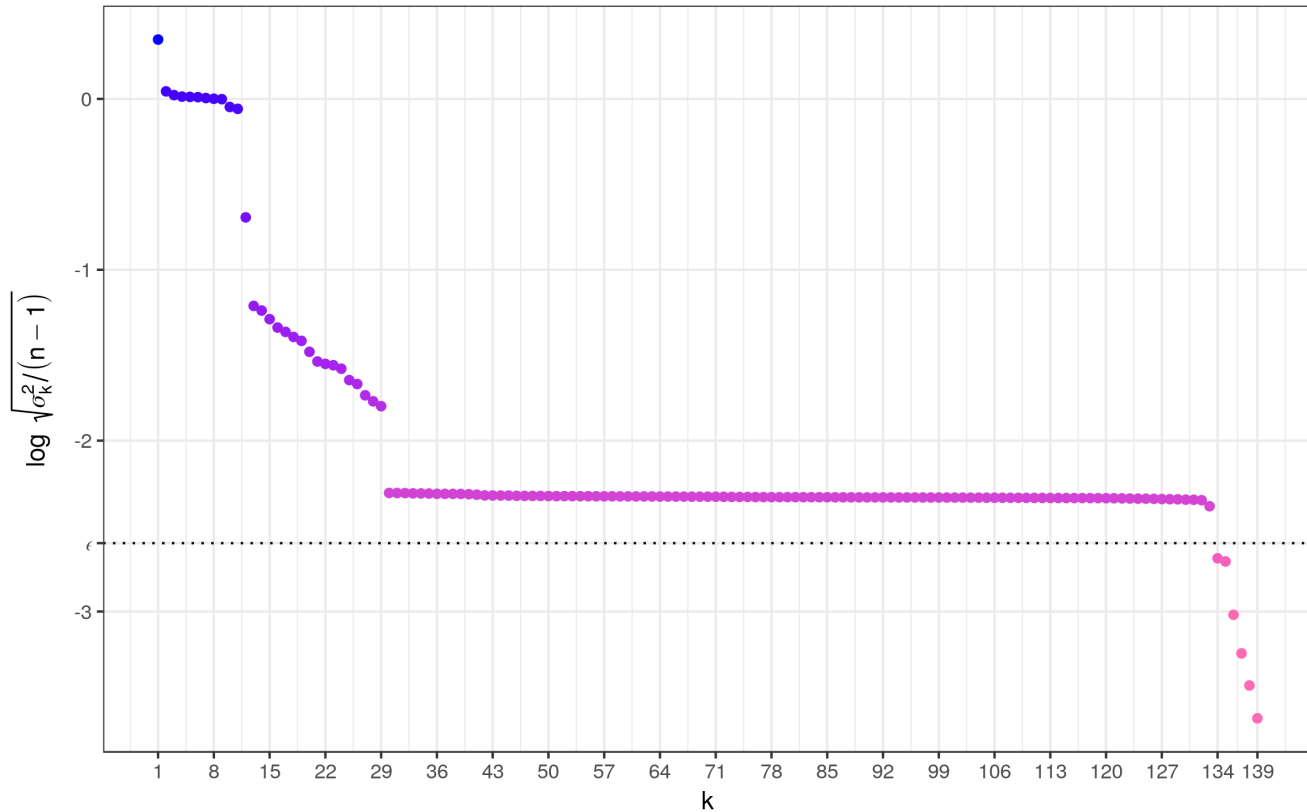

## S4.2 Gene-wise and gene-set analyses

The MAGMA software [22] was used to perform gene-wise and gene-set analyses for the top eighteen candidate genes, separately in the PGC and UKBB datasets. Summary statistics from the PGC2 MDD GWAS [8] were used as input for the PGC analyses, whereas raw genotypes were available for the UKBB.

As only summary statistics were available for the PGC sample, the primary analyses used the  $-\sum \log p$  method, which is MAGMA’s default gene-level association statistic for summary statistics. In the UKBB, where individual-level genotype data were available, primary analyses used the principal components regression method (regressing phenotype on the principal components corresponding to nontrivial singular values of the matrix of SNP genotypes within a given gene), which is MAGMA’s default gene-level association statistic for genotype data. Secondary analyses for all samples utilized the min  $p$ -value method.

Paraphrasing the [MAGMA manual](#), the min  $p$ -value model is most sensitive when only a small proportion of SNPs in a gene show association, whereas both the mean SNP association and principal components regression models are more attuned to the mean SNP association. The mean SNP association model tends to skew towards associations in areas of higher linkage disequilibrium (LD) within a gene, whereas the principal components regression model has greater power to detect associations in low LD areas, but is less sensitive when only a small proportion of SNPs within a gene are associated.

The “competitive” tests (see below) are reported with one-sided  $p$ -values and “relative” tests are reported with two-sided  $p$ -values as per MAGMA guidelines. We included sex, age, age<sup>2</sup>, genotyping batch, assessment center, and the first 10 European ancestry principal components as covariates for UKBB phenotypes. When annotating SNPs to genes, we used the NCBI Build 37 gene locations and allowed SNPs within a 25kb window of the gene start and end points to be mapped to that gene. Comparison gene sets were downloaded from the GWAS Catalog [23] and from the CTG lab’s list of curated pre- and post-synapse gene sets [24, 25].

### S4.2.1 Gene-wise analyses

**UKBB sample (individual-level genotype data).** Briefly, the default gene analysis in MAGMA for raw genotype data is based on multiple linear principal components regression, using an  $F$ -test to compute the gene  $p$ -value (although some assumptions of the  $F$ -test are violated when the outcome is a polychotomous phenotype, as in some of our analyses, comparisons of MAGMA’s  $F$ -test  $p$ -values with  $p$ -values based on permutation procedures showed that the  $F$ -test remains accurate [22]). This default model first projects the SNP matrix for a gene onto its principal components (PCs), prunes away the PCs with near-zero eigenvalues, and retains the remaining PCs as predictors for the phenotype in a linear regression model, controlling for relevant covariates (e.g., gene size, density of SNPs within the gene). In secondary analyses, we used the smallest SNP  $p$ -value within each gene as the gene-level test statistic.

**PGC sample (summary statistic data).** Primary analyses measured gene-wise association strength by the sum of the  $-\log(p)$  values for all SNPs within the gene boundary. This model tests the mean association within a gene, and is similar to models implemented in VEGAS [26] and plink v1.9 [10]. The European subset of 1000 Genomes Phase 3 [27] was used as a reference sample to account for LD between genes. Gene-level  $p$ -values are derived from this scaled  $\chi^2$  distribution and standardized via the inverse standard normal distribution function. Secondary analyses instead used the minimum SNP  $p$ -value per gene.

### S4.2.2 Gene-set analyses

After calculating the strength of association for all genes across the genome, the 18 identified candidate genes were considered as a gene set in two series of analyses:

1. MAGMA’s “competitive” test assesses whether genes in the candidate gene set are more associated with MDD than all other genes not in the gene set, controlling for potentially confounding gene characteristics in the model (inverse gene minor allele count (MAC), gene density, gene length, and the log of those values).
2. MAGMA’s “relative” test assesses whether genes in the candidate gene set show stronger or weaker associations with MDD than control sets of genes (genes involved in type 2 diabetes, height, or synaptic processes, chosen as negative controls).

## S4.3 Power analyses

### S4.3.1 Logistic models

Logistic power analyses were performed using Purcell’s Genetic Power Calculator [28]. Average counted allele frequency across the sixteen polymorphisms was used for the analysis presented in Figure 2, whereas the specific allele frequency of rs12552 was used in calculating its estimated minimum sample size for 80% power.

### S4.3.2 Negative binomial models

To our knowledge, no closed form power function for incident rate ratios associated with polychotomous predictors (i.e., genetic polymorphisms) in the context of negative binomial GLMs is known. We therefore proceeded using a combination of simulation and numerical techniques.

1. Using the mean empirical dispersion parameter  $\bar{\theta}$  across negative binomial models of current MDD severity (MHF) and the average counted allele frequency of the sixteen candidate polymorphisms  $\bar{p}$ , we executed 1000 Monte Carlo iterations regressing  $N_k$  observations  $Y$  on  $G$  with

$$G \sim \text{Binom}(2, \bar{p})$$

$$Y \sim \text{NegBinom}(\text{rate} = 1 \cdot \lambda_k^G, \text{dispersion} = \bar{\theta})$$

for varying incident rate ratios  $\lambda_k$  and sample sizes  $N_k$  to obtain empirical power estimates  $\gamma_k$ .



2. A logistic function of the form

$$\hat{\gamma}_k = (1 + \exp(-\kappa * (x - \delta)))^{-1},$$

with parameters  $\kappa$ ,  $\delta$  as linear functions of the sample size and rate

$$(\kappa, \delta) = (\mathbf{1}, N, \lambda) \begin{pmatrix} a_0 & b_0 \\ a_1 & b_1 \end{pmatrix},$$

was fit to the data by minimizing the loss function

$$g(a_0, a_1, b_0, b_1) = \|\gamma - \hat{\gamma}\|_2.$$

3. This resulted in a logistic approximation to the power function with a mean absolute deviation of 3.764e-03 ( $sd = 6.629e-03$ ) and maximal deviation of 4.596e-02, which was used to interpolate approximate power for new values of  $N$  and  $\lambda$ . Results are presented graphically in [S4.2](#).

### S4.3.3 Power under measurement error regimes

**Main effects** We employed simulation to demonstrate that even severe measurement error with respect to MDD phenotypes would not impact our ability to detect the large candidate polymorphism main effects. For simplicity, we consider the only the binary estimated lifetime MDD diagnosis phenotype, for which we observed 29,945 cases and 85,513 controls. As a lower bound on a plausibly detectable candidate polymorphism effect, we considered the minimum detectable relative risk at 50% power in a perfectly balanced study of 500 cases and 500 controls, assuming a disease prevalence of 14.6% [29] and a risk allele frequency of 0.5 (RR = 1.161; OR = 1.189; note that choosing a lower risk allele frequency would increase the corresponding RR/OR). We then simulated case/control phenotypes  $Y$  and genotypes  $G$  for 29,945 cases and 85,513 controls and subsequently corrupted phenotype observations under three severe systematic measurement error regimes:

1. **50/50 misclassification:** for each observation, there was 50% chance that we observed the true diagnosis and a 50% chance that we based the diagnosis on the outcome of a fair coin toss;
2. **Overdiagnosis:** cases were correctly identified, but controls had a 50% chance of being misclassified as cases;
3. **Underdiagnosis:** controls were correctly identified, but cases had a 50% chance of being misclassified as controls.

Monte Carlo simulation results indicated power  $\approx 100\%$  at  $\alpha_{\text{gwas}} = 5e-08$  for detecting the effect (which is small relative to effects reported in the candidate polymorphism literature and large relative to those reported in the GWAS literature) under all three regimes (Figure [S4.3](#)).

Figure S4.3: Power simulations for main effect detection under measurement error regimes

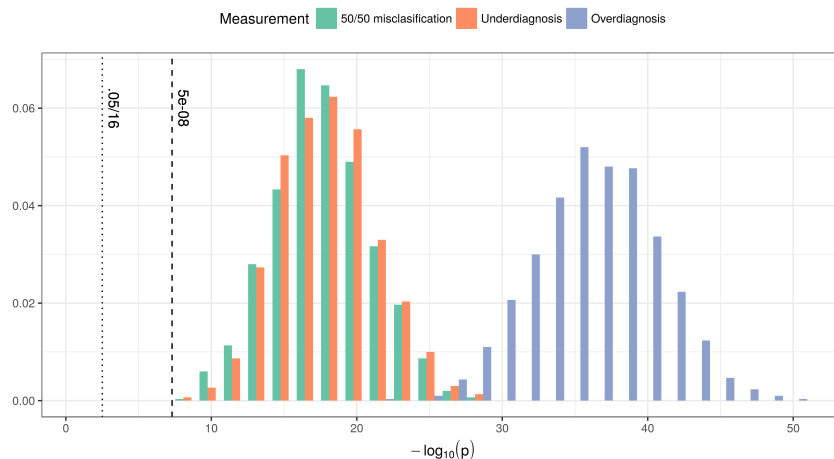

Figure S4.2: Logistic approximation of negative binomial regression power function

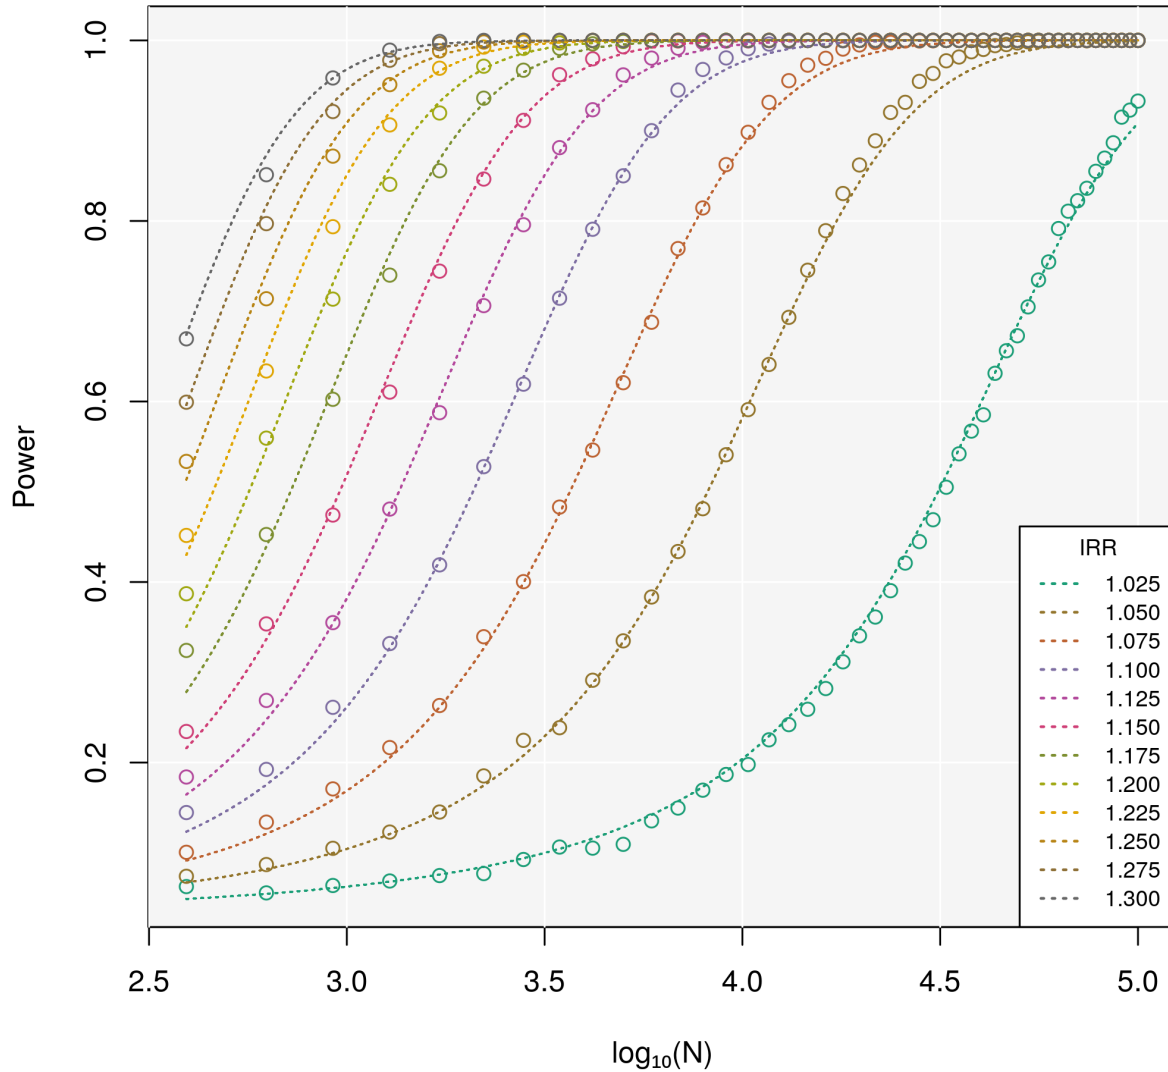

Dashed lines represent fitted predictions of logistic approximation whereas points represent empirical power estimates from Monte Carlo simulations.

This is not to say measurement error is a non-issue in genetic association studies. Indeed, the extreme scenarios considered above would have a catastrophic impact on our ability to detect an effect on the order of the strongest association observed in the PGC (rs12552, uncorrected OR = 1.044,  $p=6.093e-15$ ), which we demonstrate via an analogous set of simulations in Figure S4.4.

Figure S4.4: Power simulations for detection of association at rs12552 under measurement error regimes

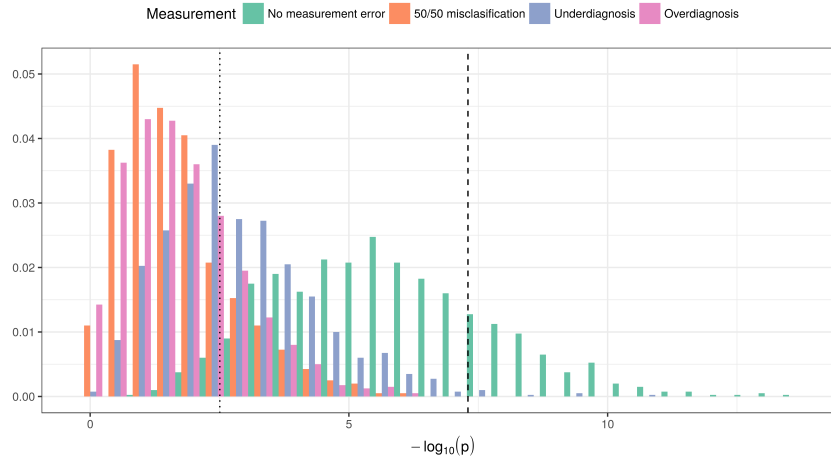

Left dotted line:  $\alpha_{\text{poly}} = .05/16$ ; right dashed line:  $\alpha_{\text{gwas}} = 5\text{e-}08$ .

**Interactions effects** We also used simulation to demonstrate that severe measurement error with respect to both MDD phenotypes and environmental exposures would have a limited impact on our ability to detect the large candidate polymorphism  $\times$  environment effects. We constructed a genotype  $G$  with a risk allele frequency of .5 and a binary exposure phenotype  $T$  with an exposure rate of .222, which matched that of our childhood traumatic event measurement in the UKBB. Additionally, we again constructed a binary diagnosis phenotype  $Y$  with 29,945 cases and 85,513 controls, via the following logistic model:

$$Pr(\text{Diagnosis}) = \text{logistic} \left\{ \begin{pmatrix} \vdots & \vdots & \vdots & \vdots \\ \bar{1} & G & T & (G \circ T) \\ \vdots & \vdots & \vdots & \vdots \end{pmatrix} \begin{pmatrix} \text{logit}(0.259) \\ \log(0.9738) \\ \log(1.677) \\ \log(1.1442) \end{pmatrix} \right\}$$

where  $\circ$  is the element-wise product. We assume that  $G$  and  $T$  have been mean centered.

The above parameters, which were derived numerically and are readily verified via simulation, are such that there is near zero main effect of genotype (detectable with  $\approx 0.4\%$  power at  $\alpha_{\text{poly}} = .05/16$  in the context of a model excluding the interaction term in our sample of 115,458) and that the interaction would again be detectable with  $\approx 50\%$  power in a sample of 500 cases and 500 controls.

We then again used a Monte Carlo procedure to determine power to detect the interaction in a sample analogous in size and prevalence of trauma exposure and MDD diagnosis prevalence to the subsample of the UKBB for which those measures were observed, corrupted under all pairwise combinations of the following severe measurement error regimes:

| MDD diagnosis error regimes:                                                                                                                                                                       | Trauma exposure error regimes:                                                                                                                                                                   |
|----------------------------------------------------------------------------------------------------------------------------------------------------------------------------------------------------|--------------------------------------------------------------------------------------------------------------------------------------------------------------------------------------------------|
| 1. <b>No measurement error:</b> the correct case/control status is observed for all individuals;                                                                                                   | 1. <b>No measurement error:</b> the correct exposure status is observed for all individuals;                                                                                                     |
| 2. <b>50/50 misclassification:</b> for each observation, there was 50% chance that we observed the true diagnosis and a 50% chance that we based the diagnosis on the outcome of a fair coin toss; | 2. <b>50/50 misclassification:</b> for each observation, there was 50% chance that we observed their true exposure status and a 50% chance that we based exp on the outcome of a fair coin toss; |
| 3. <b>Overdiagnosis:</b> cases were correctly identified, but controls had a 50% chance of being misclassified as cases;                                                                           | 3. <b>Over classification:</b> exposed individuals were correctly identified, but non-exposed individuals had a 50% chance of being misclassified as exposed;                                    |
| 4. <b>Underdiagnosis:</b> controls were correctly identified, but cases had a 50% chance of being misclassified as controls.                                                                       | 4. <b>Under classification:</b> non-exposed individuals were correctly identified, but exposed individuals had a 50% chance of being misclassified as non-exposed.                               |

The choice of these parameters reflects a small interaction effect by candidate gene study standards (one that would only be detected half the time in a balanced case/control sample of 1000) obscured by horrendous measurement error. Nevertheless, Monte Carlo simulation results indicated power  $\approx 100\%$  at  $\alpha_{\text{poly}} = .05/16$  for detecting the interaction effect under every combination of measurement error regimes in a sample analogous to our own (Figure S4.5).

Figure S4.5: Power simulations for interaction effect detection under measurement error regimes

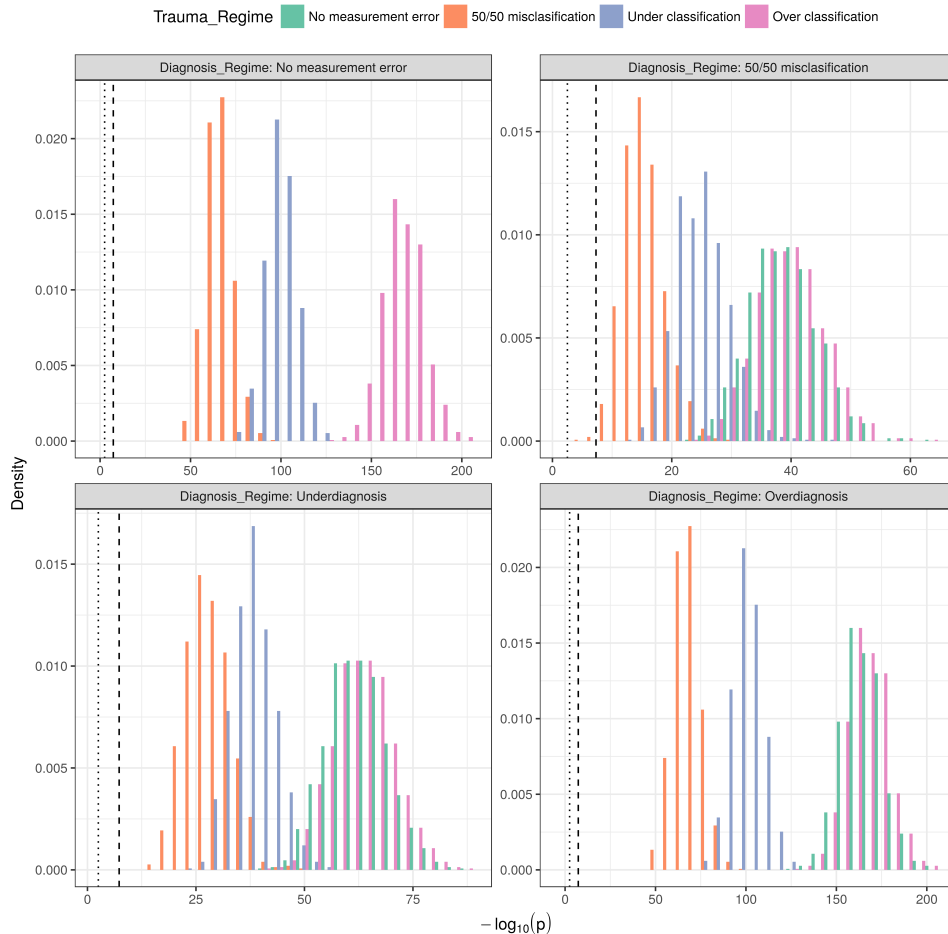

Left dotted line:  $\alpha_{\text{poly}} = .05/16$ ; right dashed line:  $\alpha_{\text{gwas}} = 5\text{e-}08$ .

#### S4.4 Heritability and genetic correlation estimation

LD score regression (LDSC v1.0.0; [30, 31]) was used to estimate heritability and genetic correlation among depression phenotypes, as well as height and type 2 diabetes (genes associated with the latter phenotypes were used as negative controls in the relative gene-set analyses; see S4.2.2 for further details).

Whereas genome-wide summary statistics were available for PGC lifetime MDD diagnosis, linear mixed-model association tests for the  $\sim 1.4$  million SNPs utilized by LDSC were performed for each of the UKBB depression phenotypes using BOLT-LMM v2.3.2 [32], controlling for fixed effects of age, age<sup>2</sup>, sex, assessment center, genotyping batch, and the first ten European ancestry principle components. Publicly available summary statistics for height and type 2 diabetes were downloaded from the GIANT [33] and DIAGRAM [34] consortia, respectively. Heritability estimates for binary phenotypes were translated to the liability scale via LDSC, assuming lifetime prevalences of 14.6% [29] and 5.7% [35] for MDD and type-2 diabetes, respectively. Results are presented in Tables S3.3-S3.4 and Figure S3.3.

## S4.5 Replication of top PGC hits

In order to better contextualize the lack of replication of the of 16 candidate genetic polymorphisms, we sought to replicate the top 16 independent loci (among genome-wide significant loci) identified by the independent PGC meta-analysis (described in S2.1) in the UKBB, with respect to estimated lifetime MDD diagnosis. Estimated lifetime MDD diagnosis (described in S3.1.1) was chosen as we believe it most closely resembles the clinical diagnosis phenotype examined in the PGC. The choice of sixteen polymorphisms was made in the interest of parallelism with our investigation of candidate gene polymorphisms. Results are presented in S12.

### S4.5.1 Identification of independent loci

Mirroring the approach taken by [8], independent genome-wide significant loci were identified via clumping within sliding 3 megabase/ $R^2 < .1$  windows via the plink v1.9 command `--clump-r2 .1 --clump-kb 3000 --clump-p1 1e-04 --clump-p2 1e-04`. The 1000 Genomes Phase 3 (1KG; [27]) and UK10K ([36]) panels were combined to map linkage disequilibrium. The top 16 significant loci were selected for replication in the UKBB (S12).

### S4.5.2 Association analyses

The main effects of the top sixteen genome-wide significant loci identified in the independent PGC meta-analysis on estimated lifetime MDD diagnosis in the UKBB were tested using the main effect model described in S4.1. Results are presented in S12.

### S4.5.3 Replication power analysis and correction for the winner’s curse

As noted in the primary manuscript, the present study had  $> 99.99\%$  power at  $\alpha_{\text{gwas}} = 5\text{e-}08$  to detect an effect that could only be detected with 20% power at  $\alpha = .05$  in a sample of 1,000 individuals, a sample size larger than those examined in most candidate gene studies. In contrast, the top sixteen genome-wide significant hits in the PGC were small to begin with (the largest hit, rs12552, had an estimated odds ratio of 1.044). Thus, we conducted power analyses with respect to our ability to detect the effects of the top PGC loci in the UKBB given their estimated effects. Further, because GWAS hits are only considered “hits” given significance at  $\alpha_{\text{gwas}} = 5\text{e-}08$ , estimated effects are subject to the *winner’s curse* [37]; that is, they are biased towards extreme values. As a result, power estimates based significant GWAS effect size estimates will be commensurately biased upward.

To account for this, we implemented the weighted corrected estimator  $\hat{\beta}_{\text{MSE}}$  proposed in [38], where they demonstrated unbiasedness via simulation (details provided below) For highly significant associations relative to the significance criterion (e.g., rs12552, which was significant at  $p = 6.093\text{e-}15$ ), the winner’s curse correction has little impact on the effect size distribution. In contrast, for associations only barely significant relative to the significance criterion (e.g., rs10514304, which was significant at  $p = 3.627\text{e-}08$ ), failure to adjust for the winner’s curse correction dramatically biased the estimated effect upwards (S12). We then estimated power to detect an association with estimated lifetime MDD diagnosis using allele frequencies from the UK10K reference panel and assuming a prevalence of 14.6% as reported in [29].

Finally, we calculated the expected number of replicated effects in UKBB, where “replication” was defined as attaining significance at  $\alpha_{\text{poly}} = .05/16$ , again for comparability with our attempts to detect associations for sixteen candidate polymorphisms in the UKBB. To do this, we modeled replication for each  $j^{\text{th}}$  locus as an independent Bernoulli trial with parameters  $p_j = \widehat{\text{power}}_j$  and used a Monte Carlo procedure to obtain the distribution of the number of replications given the corrected power estimates  $\widehat{\text{power}}_j$ ,  $j = 1, \dots, 16$  (Figure S4.6).

Figure S4.6: Distribution of number of replicated associations

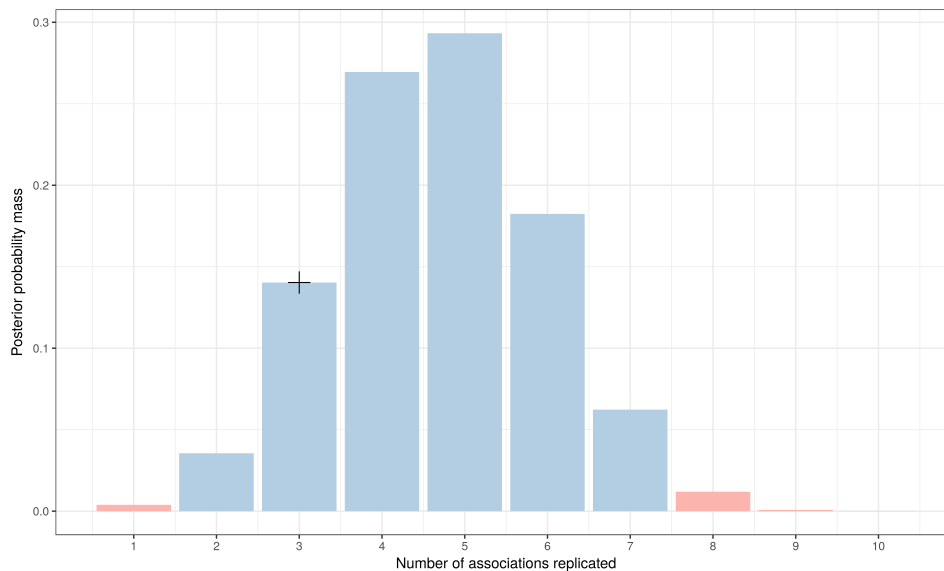

Distribution of the number of the top 16 PGC associations we'd expect to replicate at  $\alpha_{\text{poly}} = .05/16$  in the UKBB data given winner's curse corrected power estimates. Light blue bars indicate the 95% credible interval (exact interval: 2 - 7; smoothed interval using estimator of [39]: 2.064 - 7.321). The cross at 3 indicates the actual number of replicated associations.

### Details of the estimator $\hat{\beta}_{MSE}$

We describe the corrected estimator  $\hat{\beta}_{MSE}$  proposed in [38].

Let  $\hat{\beta}$ ,  $\hat{s}$  denote the uncorrected estimates of the log odds ratio and it's standard error, and let  $\mathcal{S} = \{(\hat{\beta}, \hat{s}) : |\hat{\beta}/\hat{s}| > c\}$  denote the set of such estimates satisfying genome-wide significance, where  $c = \Phi^{-1}(1 - \frac{\alpha_{\text{gwas}}}{2})$ . Then the conditional density of the uncorrected estimator  $\hat{\beta}$  given the true effect  $\beta$  and selection is

$$f_{\hat{\beta}|(\hat{\beta}, \hat{s}) \in \mathcal{S}}(x; \beta) = \frac{\frac{1}{\hat{s}} \phi\left(\frac{x-\beta}{\hat{s}}\right)}{\Phi\left(\frac{x-\beta}{\hat{s}} - c\right) + \Phi\left(-\frac{\beta}{\hat{s}} - c\right)} \mathbb{I}\left[(\hat{\beta}, \hat{s}) \in \mathcal{S}\right].$$

The corrected quantile estimator  $\hat{\beta}_{\text{Med}}$  is the solution to

$$\hat{\beta}_{\text{Med}} = \gamma \text{ s.t. } \int_{-\infty}^{\hat{\beta}} f_{\hat{\beta}|(\hat{\beta}, \hat{s}) \in \mathcal{S}; \gamma}(x; \gamma) dx = \frac{1}{2},$$

We used the bias-reduced estimator  $\hat{\beta}_{MSE}(p)$ , evaluated at  $p = .5$ , which is given by the linear combination

$$\begin{aligned} \hat{\beta}_{MSE}(p) &= \hat{K}(p) \hat{\beta}_{\text{uncr}}(p) + (1 - \hat{K}(p)) \hat{\beta}_Q(p), \\ \hat{K}(p) &= \frac{\hat{s}^2}{\hat{s}^2 + \left(\hat{\beta}_{\text{uncr}}(p) - \hat{\beta}_Q(p)\right)^2}, \\ \hat{\beta}_{\text{uncr}}(p) &= F_{\mathcal{N}(\hat{\beta}, \hat{s})}^{-1}(p). \end{aligned}$$

$\hat{\beta}_{MSE}$  does not admit a closed form representation and thus was computed via standard root finding methods.

## S5 Amendments to preregistration

Our analysis plan was preregistered through the Open Science Framework after identification of top candidate genes/polymorphisms and prior to running any analyses. The preregistration is available at <https://osf.io/xrkm6/>. Below we discuss changes to the preregistration reflecting 1. corrections to and 2. departures from the preregistered protocol.

### S5.1 Corrections

1. Genotyping batch and assessment center are missing from the list of covariates.
2. The PubMed searches listed in the section “Documented in `geneID/geneIdentification.md`” are inaccurate. The correct searches are detailed in section [S1 on page 4](#).
3. The estimated lower bounds of number of studies per gene are incorrect as they were based on data that included the first few months of 2017. Corrected results based on the 25 year period from 1991 to 2016 are given in Table 1 of the primary manuscript.
4. The name of the top polymorphism in *ABCB1* contains a typo.
5. In the polymorphism-based analysis plan, the GLM families for the variable `ukb_tdi` was mistakenly labeled as linear and `ukb_sx_lif_cond` as logit when the reverse was intended.
6. Testing center and genotyping batch were mistakenly omitted from the list of covariates to be used in the UKBB analysis protocols.

### S5.2 Departures

1. The  $\text{age} \times \text{sex}$  and  $\text{age}^2 \times \text{sex}$  covariates were omitted as high multicollinearity with the other covariates caused convergence difficulties in fitting many of the GLMs. Further, additional multicollinearity problems were addressed as described in [S4.1](#). Both procedures were implemented for purely computational reasons did not substantively change any results.
2. Analyses using the severe recurrent depression phenotype described in [S3.1.7 on page 15](#) were *post hoc* and intended as a sensitivity analysis to ensure results didn’t change substantially when using a stricter ascertainment protocol.
3. The analyses examining the main effects of environmental exposure variables presented in [S6](#) were not present in the preregistered analysis protocol.
4. The heritability/genetic correlation analyses detailed in [S4.4](#) were not present in the preregistered analysis protocol.
5. The attempted replication of the top 16 loci described in [S4.5](#) were suggested by a reviewer.
6. The simulations examining the potential impact of measurement error described in [S4.3.3](#) were motivated by the concerns of a reviewer.

Table S4.1: Interaction models

| <b>Moderator</b>                        | <b>Outcomes</b>                                                 | <b>Presentation</b> | <b>Family</b>     |
|-----------------------------------------|-----------------------------------------------------------------|---------------------|-------------------|
| <i>Childhood trauma</i>                 | Estimated lifetime MDD Diagnosis                                | <i>primary</i>      | Bernoulli         |
|                                         | Conditional lifetime symptom count                              | <i>secondary</i>    | Gaussian          |
|                                         | Lifetime episode count                                          | <i>secondary</i>    | Binomial          |
|                                         | Severe recurrent depression <sup>†</sup>                        | <i>secondary</i>    | Binomial          |
| <i>Adult trauma</i>                     | Estimated lifetime MDD Diagnosis                                | <i>primary</i>      | Gaussian          |
|                                         | Conditional lifetime symptom count                              | <i>secondary</i>    | Bernoulli         |
|                                         | Lifetime episode count                                          | <i>secondary</i>    | Binomial          |
|                                         | Severe recurrent depression <sup>†</sup>                        | <i>secondary</i>    | Binomial          |
| <i>Townsend deprivation index (TDI)</i> | Estimated lifetime MDD Diagnosis                                | <i>secondary</i>    | Bernoulli         |
|                                         | Conditional lifetime symptom count                              | <i>secondary</i>    | Gaussian          |
|                                         | Lifetime episode count                                          | <i>secondary</i>    | Binomial          |
|                                         | Severe recurrent depression <sup>†</sup>                        | <i>secondary</i>    | Binomial          |
|                                         | Touchscreen probable lifetime diagnosis, binary classification  | <i>secondary</i>    | Bernoulli         |
|                                         | Touchscreen probable lifetime diagnosis, ordinal classification | <i>secondary</i>    | Binomial          |
| <i>Stressor-induced depression</i>      | Conditional lifetime symptom count                              | <i>secondary</i>    | Gaussian          |
|                                         | Current MDD severity                                            | <i>primary</i>      | Negative binomial |

*Interaction models included in preregistered analysis plan. Primary analyses are presented graphically in the main body of manuscript. All plausible interactions with adequate sample sizes were tested (e.g., moderation of estimated lifetime diagnosis associations by past year trauma was not of interest).*

<sup>†</sup>Severe recurrent depression was added after preregistration as a post-hoc analysis.



Part II

# Supplemental results

## S6 Main effects of moderator variables

Table S6.1: Main effects of environmental moderators

| <i>Outcome</i>                                   | <i>Predictor</i>           | <i>Estimate</i>    | <i>se</i> | <i>z</i> | <i>p</i>  | $-\log_{10} p$ | <i>n</i> |
|--------------------------------------------------|----------------------------|--------------------|-----------|----------|-----------|----------------|----------|
| Estimated lifetime MDD diagnosis                 | Childhood trauma           | 1.655 <sup>†</sup> | 0.016     | 32.048   | 2.33e-225 | 224.633        | 115,405  |
| Estimated lifetime MDD diagnosis                 | Adult trauma               | 1.670 <sup>†</sup> | 0.014     | 35.968   | 2.61e-283 | 282.583        | 115,450  |
| Estimated lifetime MDD diagnosis                 | Townsend deprivation index | 1.140 <sup>†</sup> | 0.008     | 16.318   | 7.31e-60  | 59.136         | 115,339  |
| Conditional lifetime symptom count               | Childhood trauma           | 0.408 <sup>‡</sup> | 0.016     | 26.190   | 2.28e-150 | 149.643        | 62,210   |
| Conditional lifetime symptom count               | Adult trauma               | 0.381 <sup>‡</sup> | 0.014     | 27.338   | 1.40e-163 | 162.854        | 62,237   |
| Conditional lifetime symptom count               | Townsend deprivation index | 0.086 <sup>‡</sup> | 0.008     | 10.798   | 3.73e-27  | 26.429         | 62,171   |
| Lifetime episode count                           | Childhood trauma           | 1.566 <sup>†</sup> | 0.014     | 32.930   | 8.12e-238 | 237.090        | 112,412  |
| Lifetime episode count                           | Adult trauma               | 1.523 <sup>†</sup> | 0.012     | 39.707   | 0.00e+00  | ∞              | 112,451  |
| Lifetime episode count                           | Townsend deprivation index | 1.142 <sup>†</sup> | 0.007     | 19.386   | 1.01e-83  | 82.994         | 112,340  |
| Touchscreen probable lifetime diagnosis          | Childhood trauma           | 1.759 <sup>†</sup> | 0.031     | 18.493   | 2.33e-76  | 75.632         | 28,716   |
| Touchscreen probable lifetime diagnosis          | Adult trauma               | 1.796 <sup>†</sup> | 0.028     | 20.802   | 4.13e-96  | 95.385         | 28,727   |
| Touchscreen probable lifetime diagnosis          | Townsend deprivation index | 1.180 <sup>†</sup> | 0.009     | 18.871   | 1.97e-79  | 78.706         | 80,083   |
| Touchscreen probable lifetime diagnosis, ordinal | Childhood trauma           | 1.545 <sup>†</sup> | 0.031     | 14.145   | 2.00e-45  | 44.699         | 28,716   |
| Touchscreen probable lifetime diagnosis, ordinal | Adult trauma               | 1.476 <sup>†</sup> | 0.027     | 14.583   | 3.60e-48  | 47.444         | 28,727   |
| Touchscreen probable lifetime diagnosis, ordinal | Townsend deprivation index | 1.161 <sup>†</sup> | 0.009     | 17.293   | 5.35e-67  | 66.272         | 80,083   |
| Current MDD severity                             | Recent trauma              | 1.431 <sup>*</sup> | 0.013     | 27.004   | 1.32e-160 | 159.880        | 115,447  |

Main effects of environmental moderators on primary and secondary MDD outcomes in the UKBB. Only TDI is standardized.

<sup>†</sup>Odds ratios; <sup>‡</sup>Linear regression slopes; <sup>\*</sup>Incident rate ratios

## S7 Polymorphism level main effects

Table S7.1: Estimated lifetime MDD diagnosis: main effect of variant

|           | Gene          | Polymorphism           | Risk/counted allele | $\exp(\beta)$ | $se_{\beta}$ | Corrected CI  | $ z $ | $p$   | $n$     |
|-----------|---------------|------------------------|---------------------|---------------|--------------|---------------|-------|-------|---------|
| <b>1</b>  | <i>SLC6A4</i> | <i>5-HTTLPR</i>        | Low activity        | 1.000         | 0.010        | 0.972 - 1.029 | 0.007 | 0.994 | 115,257 |
| <b>2</b>  | <i>BDNF</i>   | <i>rs6265</i>          | A                   | 0.998         | 0.012        | 0.962 - 1.036 | 0.132 | 0.895 | 115,257 |
| <b>3</b>  | <i>COMT</i>   | <i>rs4680</i>          | G                   | 0.988         | 0.010        | 0.960 - 1.017 | 1.249 | 0.212 | 115,257 |
| <b>4</b>  | <i>HTR2A</i>  | <i>rs6311</i>          | A                   | 0.980         | 0.010        | 0.952 - 1.009 | 2.007 | 0.045 | 115,257 |
| <b>5</b>  | <i>TPH1</i>   | <i>rs1800532</i>       | A                   | 1.000         | 0.010        | 0.971 - 1.029 | 0.041 | 0.968 | 115,257 |
| <b>6</b>  | <i>DRD4</i>   | <i>VNTR</i>            | 7+ repeats          | 1.012         | 0.012        | 0.978 - 1.048 | 1.050 | 0.294 | 115,257 |
| <b>7</b>  | <i>DRD2</i>   | <i>rs1800497</i>       | T                   | 0.972         | 0.012        | 0.938 - 1.007 | 2.352 | 0.019 | 115,257 |
| <b>8</b>  | <i>MAOA</i>   | <i>VNTR</i>            | 2, 3, or 5 repeats  | 0.998         | 0.009        | 0.973 - 1.025 | 0.200 | 0.841 | 115,257 |
| <b>9</b>  | <i>APOE</i>   | <i>rs429358/rs7412</i> | $\epsilon$ -4       | 0.996         | 0.014        | 0.957 - 1.037 | 0.302 | 0.762 | 115,257 |
| <b>10</b> | <i>MTHFR</i>  | <i>rs1801133</i>       | T                   | 1.005         | 0.010        | 0.975 - 1.036 | 0.456 | 0.648 | 115,257 |
| <b>11</b> | <i>CLOCK</i>  | <i>rs1801260</i>       | C                   | 1.010         | 0.011        | 0.978 - 1.044 | 0.941 | 0.347 | 115,257 |
| <b>12</b> | <i>SLC6A3</i> | <i>VNTR</i>            | 10+ repeats         | 1.008         | 0.011        | 0.975 - 1.042 | 0.721 | 0.471 | 115,257 |
| <b>13</b> | <i>ACE</i>    | <i>in/del</i>          | deletion            | 1.002         | 0.010        | 0.974 - 1.031 | 0.229 | 0.819 | 115,257 |
| <b>14</b> | <i>ABCB1</i>  | <i>rs1045642</i>       | C                   | 1.005         | 0.010        | 0.976 - 1.034 | 0.482 | 0.630 | 115,257 |
| <b>15</b> | <i>DRD3</i>   | <i>rs6280</i>          | C                   | 0.988         | 0.010        | 0.958 - 1.018 | 1.202 | 0.229 | 115,257 |
| <b>16</b> | <i>DBH</i>    | <i>rs1611115</i>       | T                   | 0.986         | 0.012        | 0.951 - 1.022 | 1.186 | 0.236 | 113,474 |

*Note:* Logistic regression weights for estimated lifetime MDD diagnosis on variant, controlling for sex, age, age<sup>2</sup>, 10 European ancestry principle components, testing center, and batch.

Table S7.2: Current MDD severity: main effect of variant

|           | Gene          | Polymorphism           | Risk/counted allele | $\exp(\beta)$ | $se_{\beta}$ | Corrected CI  | $ z $ | $p$   | $n$     |
|-----------|---------------|------------------------|---------------------|---------------|--------------|---------------|-------|-------|---------|
| <b>1</b>  | <i>SLC6A4</i> | <i>5-HTTLPR</i>        | Low activity        | 1.008         | 0.005        | 0.992 - 1.025 | 1.483 | 0.138 | 115,257 |
| <b>2</b>  | <i>BDNF</i>   | <i>rs6265</i>          | A                   | 1.004         | 0.007        | 0.983 - 1.025 | 0.583 | 0.560 | 115,257 |
| <b>3</b>  | <i>COMT</i>   | <i>rs4680</i>          | G                   | 0.983         | 0.005        | 0.967 - 0.999 | 3.089 | 0.002 | 115,257 |
| <b>4</b>  | <i>HTR2A</i>  | <i>rs6311</i>          | A                   | 0.998         | 0.006        | 0.981 - 1.014 | 0.438 | 0.662 | 115,257 |
| <b>5</b>  | <i>TPH1</i>   | <i>rs1800532</i>       | A                   | 1.012         | 0.006        | 0.995 - 1.029 | 2.092 | 0.036 | 115,257 |
| <b>6</b>  | <i>DRD4</i>   | <i>VNTR</i>            | 7+ repeats          | 1.004         | 0.007        | 0.985 - 1.024 | 0.626 | 0.531 | 115,257 |
| <b>7</b>  | <i>DRD2</i>   | <i>rs1800497</i>       | T                   | 0.995         | 0.007        | 0.975 - 1.015 | 0.792 | 0.428 | 115,257 |
| <b>8</b>  | <i>MAOA</i>   | <i>VNTR</i>            | 2, 3, or 5 repeats  | 0.998         | 0.005        | 0.984 - 1.012 | 0.454 | 0.650 | 115,257 |
| <b>9</b>  | <i>APOE</i>   | <i>rs429358/rs7412</i> | $\epsilon$ -4       | 0.990         | 0.008        | 0.968 - 1.013 | 1.313 | 0.189 | 115,257 |
| <b>10</b> | <i>MTHFR</i>  | <i>rs1801133</i>       | T                   | 1.012         | 0.006        | 0.995 - 1.030 | 2.116 | 0.034 | 115,257 |
| <b>11</b> | <i>CLOCK</i>  | <i>rs1801260</i>       | C                   | 0.999         | 0.006        | 0.981 - 1.017 | 0.217 | 0.828 | 115,257 |
| <b>12</b> | <i>SLC6A3</i> | <i>VNTR</i>            | 10+ repeats         | 1.003         | 0.006        | 0.985 - 1.022 | 0.504 | 0.614 | 115,257 |
| <b>13</b> | <i>ACE</i>    | <i>in/del</i>          | deletion            | 1.000         | 0.006        | 0.984 - 1.016 | 0.052 | 0.958 | 115,257 |
| <b>14</b> | <i>ABCB1</i>  | <i>rs1045642</i>       | C                   | 1.000         | 0.006        | 0.984 - 1.016 | 0.036 | 0.971 | 115,257 |
| <b>15</b> | <i>DRD3</i>   | <i>rs6280</i>          | C                   | 0.990         | 0.006        | 0.973 - 1.007 | 1.764 | 0.078 | 115,257 |
| <b>16</b> | <i>DBH</i>    | <i>rs1611115</i>       | T                   | 1.005         | 0.007        | 0.985 - 1.025 | 0.677 | 0.498 | 113,474 |

*Note:* Negative binomial regression weights for current MDD severity on variant, controlling for sex, age, age<sup>2</sup>, 10 European ancestry principle components, testing center, and batch.

Table S7.3: Conditional lifetime symptom count: main effect of variant

|    | Gene          | Polymorphism           | Risk/counted allele | $\beta$ | $se_{\beta}$ | Corrected CI   | $ z $ | $p$   | $n$    |
|----|---------------|------------------------|---------------------|---------|--------------|----------------|-------|-------|--------|
| 1  | <i>SLC6A4</i> | <i>5-HTTLPR</i>        | Low activity        | -0.004  | 0.010        | -0.033 - 0.024 | 0.458 | 0.647 | 62,138 |
| 2  | <i>BDNF</i>   | <i>rs6265</i>          | A                   | 0.008   | 0.012        | -0.028 - 0.045 | 0.665 | 0.506 | 62,138 |
| 3  | <i>COMT</i>   | <i>rs4680</i>          | G                   | -0.002  | 0.010        | -0.030 - 0.027 | 0.191 | 0.848 | 62,138 |
| 4  | <i>HTR2A</i>  | <i>rs6311</i>          | A                   | -0.003  | 0.010        | -0.032 - 0.026 | 0.257 | 0.797 | 62,138 |
| 5  | <i>TPH1</i>   | <i>rs1800532</i>       | A                   | 0.007   | 0.010        | -0.022 - 0.037 | 0.740 | 0.459 | 62,138 |
| 6  | <i>DRD4</i>   | <i>VNTR</i>            | 7+ repeats          | -0.002  | 0.012        | -0.036 - 0.032 | 0.176 | 0.860 | 62,138 |
| 7  | <i>DRD2</i>   | <i>rs1800497</i>       | T                   | -0.011  | 0.012        | -0.047 - 0.024 | 0.934 | 0.350 | 62,138 |
| 8  | <i>MAOA</i>   | <i>VNTR</i>            | 2, 3, or 5 repeats  | 0.010   | 0.009        | -0.016 - 0.035 | 1.093 | 0.274 | 62,138 |
| 9  | <i>APOE</i>   | <i>rs429358/rs7412</i> | $\epsilon$ -4       | -0.019  | 0.014        | -0.059 - 0.021 | 1.430 | 0.153 | 62,138 |
| 10 | <i>MTHFR</i>  | <i>rs1801133</i>       | T                   | -0.001  | 0.010        | -0.031 - 0.030 | 0.059 | 0.953 | 62,138 |
| 11 | <i>CLOCK</i>  | <i>rs1801260</i>       | C                   | 0.002   | 0.011        | -0.030 - 0.034 | 0.206 | 0.837 | 62,138 |
| 12 | <i>SLC6A3</i> | <i>VNTR</i>            | 10+ repeats         | -0.007  | 0.011        | -0.039 - 0.026 | 0.599 | 0.549 | 62,138 |
| 13 | <i>ACE</i>    | <i>in/del</i>          | deletion            | 0.004   | 0.010        | -0.025 - 0.032 | 0.394 | 0.694 | 62,138 |
| 14 | <i>ABCB1</i>  | <i>rs1045642</i>       | C                   | 0.003   | 0.010        | -0.026 - 0.031 | 0.283 | 0.778 | 62,138 |
| 15 | <i>DRD3</i>   | <i>rs6280</i>          | C                   | -0.005  | 0.010        | -0.035 - 0.025 | 0.507 | 0.612 | 62,138 |
| 16 | <i>DBH</i>    | <i>rs1611115</i>       | T                   | -0.008  | 0.012        | -0.044 - 0.027 | 0.672 | 0.502 | 61,208 |

Note: Linear regression weights for conditional lifetime symptom count on variant, controlling for sex, age, age<sup>2</sup>, 10 European ancestry principle components, testing center, and batch.

Table S7.4: Lifetime episode count: main effect of variant

|    | Gene          | Polymorphism           | Risk/counted allele | $\exp(\beta)$ | $se_{\beta}$ | Corrected CI  | $ z $ | $p$   | $n$     |
|----|---------------|------------------------|---------------------|---------------|--------------|---------------|-------|-------|---------|
| 1  | <i>SLC6A4</i> | <i>5-HTTLPR</i>        | Low activity        | 0.998         | 0.008        | 0.975 - 1.022 | 0.218 | 0.828 | 112,261 |
| 2  | <i>BDNF</i>   | <i>rs6265</i>          | A                   | 0.999         | 0.010        | 0.969 - 1.030 | 0.064 | 0.949 | 112,261 |
| 3  | <i>COMT</i>   | <i>rs4680</i>          | G                   | 0.994         | 0.008        | 0.971 - 1.018 | 0.729 | 0.466 | 112,261 |
| 4  | <i>HTR2A</i>  | <i>rs6311</i>          | A                   | 0.999         | 0.008        | 0.975 - 1.023 | 0.139 | 0.889 | 112,261 |
| 5  | <i>TPH1</i>   | <i>rs1800532</i>       | A                   | 1.001         | 0.008        | 0.977 - 1.026 | 0.108 | 0.914 | 112,261 |
| 6  | <i>DRD4</i>   | <i>VNTR</i>            | 7+ repeats          | 1.015         | 0.010        | 0.986 - 1.044 | 1.488 | 0.137 | 112,261 |
| 7  | <i>DRD2</i>   | <i>rs1800497</i>       | T                   | 0.983         | 0.010        | 0.954 - 1.013 | 1.694 | 0.090 | 112,261 |
| 8  | <i>MAOA</i>   | <i>VNTR</i>            | 2, 3, or 5 repeats  | 1.006         | 0.007        | 0.985 - 1.027 | 0.813 | 0.416 | 112,261 |
| 9  | <i>APOE</i>   | <i>rs429358/rs7412</i> | $\epsilon$ -4       | 1.019         | 0.011        | 0.986 - 1.054 | 1.692 | 0.091 | 112,261 |
| 10 | <i>MTHFR</i>  | <i>rs1801133</i>       | T                   | 1.008         | 0.009        | 0.983 - 1.034 | 0.912 | 0.362 | 112,261 |
| 11 | <i>CLOCK</i>  | <i>rs1801260</i>       | C                   | 0.996         | 0.009        | 0.970 - 1.023 | 0.428 | 0.669 | 112,261 |
| 12 | <i>SLC6A3</i> | <i>VNTR</i>            | 10+ repeats         | 1.009         | 0.009        | 0.981 - 1.036 | 0.926 | 0.354 | 112,261 |
| 13 | <i>ACE</i>    | <i>in/del</i>          | deletion            | 1.005         | 0.008        | 0.981 - 1.029 | 0.618 | 0.537 | 112,261 |
| 14 | <i>ABCB1</i>  | <i>rs1045642</i>       | C                   | 1.000         | 0.008        | 0.977 - 1.024 | 0.025 | 0.980 | 112,261 |
| 15 | <i>DRD3</i>   | <i>rs6280</i>          | C                   | 1.000         | 0.009        | 0.975 - 1.026 | 0.010 | 0.992 | 112,261 |
| 16 | <i>DBH</i>    | <i>rs1611115</i>       | T                   | 0.994         | 0.010        | 0.965 - 1.024 | 0.553 | 0.580 | 110,513 |

Note: Ordinal logistic regression weights for lifetime episode count on variant, controlling for sex, age, age<sup>2</sup>, 10 European ancestry principle components, testing center, and batch.

Table S7.5: Touchscreen probable lifetime diagnosis: main effect of variant

|           | Gene          | Polymorphism           | Risk/counted allele | $\exp(\beta)$ | $se_{\beta}$ | Corrected CI  | $ z $ | $p$   | $n$    |
|-----------|---------------|------------------------|---------------------|---------------|--------------|---------------|-------|-------|--------|
| <b>1</b>  | <i>SLC6A4</i> | <i>5-HTTLPR</i>        | Low activity        | 1.008         | 0.011        | 0.976 - 1.040 | 0.751 | 0.453 | 90,944 |
| <b>2</b>  | <i>BDNF</i>   | <i>rs6265</i>          | A                   | 1.010         | 0.014        | 0.970 - 1.051 | 0.743 | 0.457 | 90,944 |
| <b>3</b>  | <i>COMT</i>   | <i>rs4680</i>          | G                   | 1.003         | 0.011        | 0.971 - 1.034 | 0.238 | 0.812 | 90,944 |
| <b>4</b>  | <i>HTR2A</i>  | <i>rs6311</i>          | A                   | 1.004         | 0.011        | 0.972 - 1.037 | 0.396 | 0.692 | 90,944 |
| <b>5</b>  | <i>TPH1</i>   | <i>rs1800532</i>       | A                   | 1.000         | 0.011        | 0.968 - 1.033 | 0.025 | 0.980 | 90,944 |
| <b>6</b>  | <i>DRD4</i>   | <i>VNTR</i>            | 7+ repeats          | 1.023         | 0.013        | 0.985 - 1.061 | 1.751 | 0.080 | 90,944 |
| <b>7</b>  | <i>DRD2</i>   | <i>rs1800497</i>       | T                   | 1.023         | 0.013        | 0.983 - 1.062 | 1.663 | 0.096 | 90,944 |
| <b>8</b>  | <i>MAOA</i>   | <i>VNTR</i>            | 2, 3, or 5 repeats  | 1.001         | 0.010        | 0.973 - 1.030 | 0.130 | 0.896 | 90,944 |
| <b>9</b>  | <i>APOE</i>   | <i>rs429358/rs7412</i> | $\epsilon$ -4       | 1.009         | 0.015        | 0.965 - 1.053 | 0.633 | 0.527 | 90,944 |
| <b>10</b> | <i>MTHFR</i>  | <i>rs1801133</i>       | T                   | 1.008         | 0.011        | 0.974 - 1.042 | 0.699 | 0.485 | 90,944 |
| <b>11</b> | <i>CLOCK</i>  | <i>rs1801260</i>       | C                   | 1.031         | 0.012        | 0.995 - 1.067 | 2.482 | 0.013 | 90,944 |
| <b>12</b> | <i>SLC6A3</i> | <i>VNTR</i>            | 10+ repeats         | 1.020         | 0.012        | 0.983 - 1.056 | 1.578 | 0.114 | 90,944 |
| <b>13</b> | <i>ACE</i>    | <i>in/del</i>          | deletion            | 1.016         | 0.011        | 0.984 - 1.048 | 1.463 | 0.143 | 90,944 |
| <b>14</b> | <i>ABCB1</i>  | <i>rs1045642</i>       | C                   | 1.005         | 0.011        | 0.973 - 1.037 | 0.431 | 0.667 | 90,944 |
| <b>15</b> | <i>DRD3</i>   | <i>rs6280</i>          | C                   | 1.013         | 0.011        | 0.980 - 1.047 | 1.174 | 0.241 | 90,944 |
| <b>16</b> | <i>DBH</i>    | <i>rs1611115</i>       | T                   | 1.002         | 0.013        | 0.963 - 1.042 | 0.157 | 0.876 | 89,524 |

*Note:* Logistic regression weights for touchscreen probable lifetime diagnosis on variant, controlling for sex, age, age<sup>2</sup>, 10 European ancestry principle components, testing center, and batch.

Table S7.6: Touchscreen probable lifetime diagnosis, ordinal classification: main effect of variant

|           | Gene          | Polymorphism           | Risk/counted allele | $\exp(\beta)$ | $se_{\beta}$ | Corrected CI  | $ z $ | $p$   | $n$    |
|-----------|---------------|------------------------|---------------------|---------------|--------------|---------------|-------|-------|--------|
| <b>1</b>  | <i>SLC6A4</i> | <i>5-HTTLPR</i>        | Low activity        | 1.009         | 0.010        | 0.978 - 1.040 | 0.817 | 0.414 | 48,190 |
| <b>2</b>  | <i>BDNF</i>   | <i>rs6265</i>          | A                   | 1.011         | 0.013        | 0.972 - 1.051 | 0.848 | 0.396 | 48,190 |
| <b>3</b>  | <i>COMT</i>   | <i>rs4680</i>          | G                   | 1.003         | 0.011        | 0.972 - 1.034 | 0.280 | 0.779 | 48,190 |
| <b>4</b>  | <i>HTR2A</i>  | <i>rs6311</i>          | A                   | 1.006         | 0.011        | 0.974 - 1.037 | 0.522 | 0.602 | 48,190 |
| <b>5</b>  | <i>TPH1</i>   | <i>rs1800532</i>       | A                   | 1.001         | 0.011        | 0.969 - 1.033 | 0.093 | 0.926 | 48,190 |
| <b>6</b>  | <i>DRD4</i>   | <i>VNTR</i>            | 7+ repeats          | 1.023         | 0.013        | 0.985 - 1.060 | 1.756 | 0.079 | 48,190 |
| <b>7</b>  | <i>DRD2</i>   | <i>rs1800497</i>       | T                   | 1.023         | 0.013        | 0.984 - 1.062 | 1.694 | 0.090 | 48,190 |
| <b>8</b>  | <i>MAOA</i>   | <i>VNTR</i>            | 2, 3, or 5 repeats  | 1.000         | 0.009        | 0.972 - 1.028 | 0.016 | 0.987 | 48,190 |
| <b>9</b>  | <i>APOE</i>   | <i>rs429358/rs7412</i> | $\epsilon$ -4       | 1.009         | 0.015        | 0.966 - 1.052 | 0.605 | 0.545 | 48,190 |
| <b>10</b> | <i>MTHFR</i>  | <i>rs1801133</i>       | T                   | 1.013         | 0.011        | 0.980 - 1.046 | 1.138 | 0.255 | 48,190 |
| <b>11</b> | <i>CLOCK</i>  | <i>rs1801260</i>       | C                   | 1.029         | 0.012        | 0.994 - 1.065 | 2.426 | 0.015 | 48,190 |
| <b>12</b> | <i>SLC6A3</i> | <i>VNTR</i>            | 10+ repeats         | 1.017         | 0.012        | 0.982 - 1.053 | 1.435 | 0.151 | 48,190 |
| <b>13</b> | <i>ACE</i>    | <i>in/del</i>          | deletion            | 1.011         | 0.011        | 0.980 - 1.042 | 1.022 | 0.307 | 48,190 |
| <b>14</b> | <i>ABCB1</i>  | <i>rs1045642</i>       | C                   | 1.003         | 0.011        | 0.971 - 1.034 | 0.256 | 0.798 | 48,190 |
| <b>15</b> | <i>DRD3</i>   | <i>rs6280</i>          | C                   | 1.012         | 0.011        | 0.979 - 1.045 | 1.078 | 0.281 | 48,190 |
| <b>16</b> | <i>DBH</i>    | <i>rs1611115</i>       | T                   | 1.000         | 0.013        | 0.962 - 1.039 | 0.016 | 0.987 | 48,190 |

*Note:* Ordinal logistic regression weights for touchscreen probable lifetime diagnosis, ordinal classification on variant, controlling for sex, age, age<sup>2</sup>, 10 European ancestry principle components, testing center, and batch.

Table S7.7: Severe recurrent MDD (MHF): main effect of variant

|    | Gene          | Polymorphism           | Risk/counted allele | $\exp(\beta)$ | $se_{\beta}$ | Corrected CI  | $ z $ | $p$   | $n$    |
|----|---------------|------------------------|---------------------|---------------|--------------|---------------|-------|-------|--------|
| 1  | <i>SLC6A4</i> | <i>5-HTTLPR</i>        | Low activity        | 1.000         | 0.014        | 0.960 - 1.041 | 0.025 | 0.980 | 67,304 |
| 2  | <i>BDNF</i>   | <i>rs6265</i>          | A                   | 1.018         | 0.018        | 0.965 - 1.070 | 0.985 | 0.325 | 67,304 |
| 3  | <i>COMT</i>   | <i>rs4680</i>          | G                   | 1.030         | 0.014        | 0.988 - 1.071 | 2.095 | 0.036 | 67,304 |
| 4  | <i>HTR2A</i>  | <i>rs6311</i>          | A                   | 1.012         | 0.014        | 0.970 - 1.054 | 0.852 | 0.394 | 67,304 |
| 5  | <i>TPH1</i>   | <i>rs1800532</i>       | A                   | 1.004         | 0.014        | 0.962 - 1.046 | 0.274 | 0.784 | 67,304 |
| 6  | <i>DRD4</i>   | <i>VNTR</i>            | 7+ repeats          | 1.020         | 0.017        | 0.970 - 1.069 | 1.175 | 0.240 | 67,304 |
| 7  | <i>DRD2</i>   | <i>rs1800497</i>       | T                   | 1.009         | 0.017        | 0.958 - 1.060 | 0.505 | 0.614 | 67,304 |
| 8  | <i>MAOA</i>   | <i>VNTR</i>            | 2, 3, or 5 repeats  | 1.023         | 0.013        | 0.985 - 1.061 | 1.792 | 0.073 | 67,304 |
| 9  | <i>APOE</i>   | <i>rs429358/rs7412</i> | $\epsilon$ -4       | 1.013         | 0.019        | 0.955 - 1.070 | 0.648 | 0.517 | 67,304 |
| 10 | <i>MTHFR</i>  | <i>rs1801133</i>       | T                   | 1.017         | 0.015        | 0.973 - 1.060 | 1.117 | 0.264 | 67,304 |
| 11 | <i>CLOCK</i>  | <i>rs1801260</i>       | C                   | 1.007         | 0.016        | 0.960 - 1.053 | 0.427 | 0.669 | 67,304 |
| 12 | <i>SLC6A3</i> | <i>VNTR</i>            | 10+ repeats         | 1.010         | 0.016        | 0.963 - 1.057 | 0.610 | 0.542 | 67,304 |
| 13 | <i>ACE</i>    | <i>in/del</i>          | deletion            | 1.004         | 0.014        | 0.962 - 1.045 | 0.251 | 0.802 | 67,304 |
| 14 | <i>ABCB1</i>  | <i>rs1045642</i>       | C                   | 1.000         | 0.014        | 0.959 - 1.042 | 0.033 | 0.974 | 67,304 |
| 15 | <i>DRD3</i>   | <i>rs6280</i>          | C                   | 1.001         | 0.015        | 0.958 - 1.045 | 0.091 | 0.928 | 67,304 |
| 16 | <i>DBH</i>    | <i>rs1611115</i>       | T                   | 1.019         | 0.017        | 0.967 - 1.070 | 1.058 | 0.290 | 66,231 |

Note: Logistic regression weights for Severe recurrent MDD (MHF) on variant, controlling for sex, age, age<sup>2</sup>, 10 European ancestry principle components, testing center, and batch.

Table S7.8: PGC lifetime MDD diagnosis: main effect of variant

|    | Gene         | Polymorphism     | Risk/counted allele | $\exp \beta$ | $se_{\beta}$ | Corrected CI | $ z $ | $p$   | $n$     |
|----|--------------|------------------|---------------------|--------------|--------------|--------------|-------|-------|---------|
| 1  | <i>ABCB1</i> | <i>rs1045642</i> | C                   | 0.992        | 0.006        | 0.976-1.009  | 1.393 | 0.164 | 349,649 |
| 2  | <i>DBH</i>   | <i>rs1611115</i> | T                   | 1.005        | 0.008        | 0.981-1.029  | 0.561 | 0.575 | 287,678 |
| 3  | <i>DRD2</i>  | <i>rs1800497</i> | T                   | 0.981        | 0.007        | 0.961-1.001  | 2.743 | 0.006 | 349,491 |
| 4  | <i>TPH1</i>  | <i>rs1800532</i> | A                   | 1.008        | 0.006        | 0.992-1.025  | 1.464 | 0.148 | 247,142 |
| 5  | <i>MTHFR</i> | <i>rs1801133</i> | T                   | 0.993        | 0.006        | 0.976-1.011  | 1.153 | 0.250 | 349,311 |
| 6  | <i>CLOCK</i> | <i>rs1801260</i> | C                   | 1.014        | 0.006        | 0.995-1.032  | 2.177 | 0.029 | 349,530 |
| 7  | <i>ACE</i>   | <i>in/del</i>    | deletion            | 0.995        | 0.005        | 0.979-1.011  | 0.891 | 0.380 | 349,632 |
| 8  | <i>COMT</i>  | <i>rs4680</i>    | G                   | 1.002        | 0.006        | 0.985-1.019  | 0.333 | 0.742 | 349,318 |
| 9  | <i>BDNF</i>  | <i>rs6265</i>    | A                   | 0.995        | 0.007        | 0.974-1.016  | 0.743 | 0.462 | 349,649 |
| 10 | <i>DRD3</i>  | <i>rs6280</i>    | C                   | 1.004        | 0.006        | 0.987-1.022  | 0.678 | 0.499 | 349,649 |
| 11 | <i>HTR2A</i> | <i>rs6311</i>    | A                   | 0.998        | 0.006        | 0.982-1.015  | 0.321 | 0.743 | 349,157 |

Note: Differing sample sizes reflect that fact that not all polymorphisms were available in across all subsamples. Only polymorphisms that didn't require raw genotype to identify data were available.

## S8 Polymorphism level $G \times E$ effects

Table S8.1: Estimated lifetime MDD diagnosis on variant  $\times$  childhood trauma

|           | Gene          | Polymorphism           | Risk/counted allele | $\exp(\beta)$ | $se_{\beta}$ | Corrected CI  | $ z $ | $p$   | $n$     |
|-----------|---------------|------------------------|---------------------|---------------|--------------|---------------|-------|-------|---------|
| <b>1</b>  | <i>SLC6A4</i> | <i>5-HTTLPR</i>        | Low activity        | 0.998         | 0.022        | 0.934 - 1.066 | 0.101 | 0.919 | 115,204 |
| <b>2</b>  | <i>BDNF</i>   | <i>rs6265</i>          | A                   | 1.007         | 0.029        | 0.925 - 1.097 | 0.250 | 0.803 | 115,204 |
| <b>3</b>  | <i>COMT</i>   | <i>rs4680</i>          | G                   | 0.988         | 0.022        | 0.924 - 1.056 | 0.537 | 0.591 | 115,204 |
| <b>4</b>  | <i>HTR2A</i>  | <i>rs6311</i>          | A                   | 0.966         | 0.023        | 0.902 - 1.033 | 1.526 | 0.127 | 115,204 |
| <b>5</b>  | <i>TPH1</i>   | <i>rs1800532</i>       | A                   | 1.027         | 0.023        | 0.959 - 1.100 | 1.156 | 0.248 | 115,204 |
| <b>6</b>  | <i>DRD4</i>   | <i>VNTR</i>            | 7+ repeats          | 0.993         | 0.027        | 0.916 - 1.076 | 0.265 | 0.791 | 115,204 |
| <b>7</b>  | <i>DRD2</i>   | <i>rs1800497</i>       | T                   | 0.977         | 0.028        | 0.900 - 1.061 | 0.823 | 0.410 | 115,204 |
| <b>8</b>  | <i>MAOA</i>   | <i>VNTR</i>            | 2, 3, or 5 repeats  | 0.983         | 0.020        | 0.926 - 1.044 | 0.857 | 0.392 | 115,204 |
| <b>9</b>  | <i>APOE</i>   | <i>rs429358/rs7412</i> | $\epsilon$ -4       | 1.039         | 0.032        | 0.946 - 1.141 | 1.209 | 0.227 | 115,204 |
| <b>10</b> | <i>MTHFR</i>  | <i>rs1801133</i>       | T                   | 0.989         | 0.024        | 0.922 - 1.061 | 0.451 | 0.652 | 115,204 |
| <b>11</b> | <i>CLOCK</i>  | <i>rs1801260</i>       | C                   | 0.994         | 0.025        | 0.922 - 1.071 | 0.253 | 0.800 | 115,204 |
| <b>12</b> | <i>SLC6A3</i> | <i>VNTR</i>            | 10+ repeats         | 0.959         | 0.026        | 0.888 - 1.034 | 1.644 | 0.100 | 115,204 |
| <b>13</b> | <i>ACE</i>    | <i>in/del</i>          | deletion            | 1.006         | 0.023        | 0.941 - 1.075 | 0.254 | 0.800 | 115,204 |
| <b>14</b> | <i>ABCB1</i>  | <i>rs1045642</i>       | C                   | 0.970         | 0.023        | 0.907 - 1.037 | 1.356 | 0.175 | 115,204 |
| <b>15</b> | <i>DRD3</i>   | <i>rs6280</i>          | C                   | 0.962         | 0.024        | 0.896 - 1.032 | 1.648 | 0.099 | 115,204 |
| <b>16</b> | <i>DBH</i>    | <i>rs1611115</i>       | T                   | 0.966         | 0.028        | 0.889 - 1.050 | 1.221 | 0.222 | 113,422 |

*Note:* Logistic regression weights for estimated lifetime MDD diagnosis on variant  $\times$  childhood trauma controlling for sex, age, age<sup>2</sup>, 10 European ancestry principle components, testing center, batch and variant/moderator main effects.

Table S8.2: Estimated lifetime MDD diagnosis on variant  $\times$  adult trauma

|           | Gene          | Polymorphism           | Risk/counted allele | $\exp(\beta)$ | $se_{\beta}$ | Corrected CI  | $ z $ | $p$   | $n$     |
|-----------|---------------|------------------------|---------------------|---------------|--------------|---------------|-------|-------|---------|
| <b>1</b>  | <i>SLC6A4</i> | <i>5-HTTLPR</i>        | Low activity        | 1.016         | 0.020        | 0.958 - 1.079 | 0.803 | 0.422 | 115,249 |
| <b>2</b>  | <i>BDNF</i>   | <i>rs6265</i>          | A                   | 0.995         | 0.026        | 0.921 - 1.074 | 0.210 | 0.833 | 115,249 |
| <b>3</b>  | <i>COMT</i>   | <i>rs4680</i>          | G                   | 0.997         | 0.020        | 0.939 - 1.058 | 0.168 | 0.867 | 115,249 |
| <b>4</b>  | <i>HTR2A</i>  | <i>rs6311</i>          | A                   | 1.012         | 0.021        | 0.952 - 1.076 | 0.593 | 0.553 | 115,249 |
| <b>5</b>  | <i>TPH1</i>   | <i>rs1800532</i>       | A                   | 1.026         | 0.021        | 0.965 - 1.091 | 1.222 | 0.222 | 115,249 |
| <b>6</b>  | <i>DRD4</i>   | <i>VNTR</i>            | 7+ repeats          | 0.973         | 0.024        | 0.905 - 1.045 | 1.141 | 0.254 | 115,249 |
| <b>7</b>  | <i>DRD2</i>   | <i>rs1800497</i>       | T                   | 1.016         | 0.025        | 0.943 - 1.095 | 0.644 | 0.520 | 115,249 |
| <b>8</b>  | <i>MAOA</i>   | <i>VNTR</i>            | 2, 3, or 5 repeats  | 0.985         | 0.019        | 0.932 - 1.040 | 0.828 | 0.408 | 115,249 |
| <b>9</b>  | <i>APOE</i>   | <i>rs429358/rs7412</i> | $\epsilon$ -4       | 0.987         | 0.028        | 0.907 - 1.073 | 0.463 | 0.644 | 115,249 |
| <b>10</b> | <i>MTHFR</i>  | <i>rs1801133</i>       | T                   | 1.040         | 0.022        | 0.976 - 1.109 | 1.837 | 0.066 | 115,249 |
| <b>11</b> | <i>CLOCK</i>  | <i>rs1801260</i>       | C                   | 0.999         | 0.023        | 0.934 - 1.069 | 0.036 | 0.971 | 115,249 |
| <b>12</b> | <i>SLC6A3</i> | <i>VNTR</i>            | 10+ repeats         | 0.983         | 0.023        | 0.918 - 1.053 | 0.724 | 0.469 | 115,249 |
| <b>13</b> | <i>ACE</i>    | <i>in/del</i>          | deletion            | 0.999         | 0.020        | 0.941 - 1.061 | 0.037 | 0.971 | 115,249 |
| <b>14</b> | <i>ABCB1</i>  | <i>rs1045642</i>       | C                   | 0.983         | 0.020        | 0.926 - 1.044 | 0.835 | 0.404 | 115,249 |
| <b>15</b> | <i>DRD3</i>   | <i>rs6280</i>          | C                   | 0.986         | 0.021        | 0.925 - 1.050 | 0.677 | 0.498 | 115,249 |
| <b>16</b> | <i>DBH</i>    | <i>rs1611115</i>       | T                   | 0.967         | 0.025        | 0.897 - 1.042 | 1.334 | 0.182 | 113,466 |

*Note:* Logistic regression weights for estimated lifetime MDD diagnosis on variant  $\times$  adult trauma controlling for sex, age, age<sup>2</sup>, 10 European ancestry principle components, testing center, batch and variant/moderator main effects.

Table S8.3: Estimated lifetime MDD diagnosis on variant  $\times$  TDI

|           | Gene          | Polymorphism           | Risk/counted allele | $\exp(\beta)$ | $se_{\beta}$ | Corrected CI  | $ z $ | $p$   | $n$     |
|-----------|---------------|------------------------|---------------------|---------------|--------------|---------------|-------|-------|---------|
| <b>1</b>  | <i>SLC6A4</i> | <i>5-HTTLPR</i>        | Low activity        | 1.014         | 0.011        | 0.982 - 1.046 | 1.304 | 0.192 | 115,138 |
| <b>2</b>  | <i>BDNF</i>   | <i>rs6265</i>          | A                   | 1.035         | 0.014        | 0.995 - 1.076 | 2.539 | 0.011 | 115,138 |
| <b>3</b>  | <i>COMT</i>   | <i>rs4680</i>          | G                   | 1.008         | 0.011        | 0.977 - 1.040 | 0.791 | 0.429 | 115,138 |
| <b>4</b>  | <i>HTR2A</i>  | <i>rs6311</i>          | A                   | 1.009         | 0.011        | 0.977 - 1.041 | 0.800 | 0.424 | 115,138 |
| <b>5</b>  | <i>TPH1</i>   | <i>rs1800532</i>       | A                   | 1.008         | 0.011        | 0.976 - 1.041 | 0.741 | 0.459 | 115,138 |
| <b>6</b>  | <i>DRD4</i>   | <i>VNTR</i>            | 7+ repeats          | 1.009         | 0.013        | 0.971 - 1.048 | 0.715 | 0.474 | 115,138 |
| <b>7</b>  | <i>DRD2</i>   | <i>rs1800497</i>       | T                   | 1.006         | 0.013        | 0.967 - 1.046 | 0.469 | 0.639 | 115,138 |
| <b>8</b>  | <i>MAOA</i>   | <i>VNTR</i>            | 2, 3, or 5 repeats  | 1.010         | 0.010        | 0.981 - 1.039 | 1.024 | 0.306 | 115,138 |
| <b>9</b>  | <i>APOE</i>   | <i>rs429358/rs7412</i> | $\epsilon$ -4       | 1.001         | 0.015        | 0.956 - 1.045 | 0.038 | 0.970 | 115,138 |
| <b>10</b> | <i>MTHFR</i>  | <i>rs1801133</i>       | T                   | 1.005         | 0.011        | 0.971 - 1.039 | 0.439 | 0.660 | 115,138 |
| <b>11</b> | <i>CLOCK</i>  | <i>rs1801260</i>       | C                   | 1.021         | 0.012        | 0.985 - 1.057 | 1.687 | 0.092 | 115,138 |
| <b>12</b> | <i>SLC6A3</i> | <i>VNTR</i>            | 10+ repeats         | 1.002         | 0.012        | 0.966 - 1.039 | 0.193 | 0.847 | 115,138 |
| <b>13</b> | <i>ACE</i>    | <i>in/del</i>          | deletion            | 1.004         | 0.011        | 0.973 - 1.036 | 0.406 | 0.685 | 115,138 |
| <b>14</b> | <i>ABCB1</i>  | <i>rs1045642</i>       | C                   | 1.000         | 0.011        | 0.968 - 1.032 | 0.029 | 0.977 | 115,138 |
| <b>15</b> | <i>DRD3</i>   | <i>rs6280</i>          | C                   | 1.007         | 0.011        | 0.973 - 1.040 | 0.573 | 0.567 | 115,138 |
| <b>16</b> | <i>DBH</i>    | <i>rs1611115</i>       | T                   | 1.003         | 0.013        | 0.964 - 1.042 | 0.214 | 0.831 | 113,356 |

*Note:* Logistic regression weights for estimated lifetime MDD diagnosis on variant  $\times$  TDI controlling for sex, age, age<sup>2</sup>, 10 European ancestry principle components, testing center, batch, variant/moderator main effects, and all variant  $\times$  covariate and moderator  $\times$  covariate effects, on the multiplicative scale.

Table S8.4: Current MDD severity on variant  $\times$  recent trauma

|           | Gene          | Polymorphism           | Risk/counted allele | $\exp(\beta)$ | $se_{\beta}$ | Corrected CI  | $ z $ | $p$   | $n$     |
|-----------|---------------|------------------------|---------------------|---------------|--------------|---------------|-------|-------|---------|
| <b>1</b>  | <i>SLC6A4</i> | <i>5-HTTLPR</i>        | Low activity        | 0.991         | 0.019        | 0.938 - 1.048 | 0.464 | 0.643 | 115,246 |
| <b>2</b>  | <i>BDNF</i>   | <i>rs6265</i>          | A                   | 1.017         | 0.024        | 0.946 - 1.092 | 0.683 | 0.495 | 115,246 |
| <b>3</b>  | <i>COMT</i>   | <i>rs4680</i>          | G                   | 0.982         | 0.019        | 0.929 - 1.038 | 0.963 | 0.336 | 115,246 |
| <b>4</b>  | <i>HTR2A</i>  | <i>rs6311</i>          | A                   | 1.005         | 0.019        | 0.950 - 1.064 | 0.275 | 0.783 | 115,246 |
| <b>5</b>  | <i>TPH1</i>   | <i>rs1800532</i>       | A                   | 1.007         | 0.019        | 0.951 - 1.067 | 0.369 | 0.712 | 115,246 |
| <b>6</b>  | <i>DRD4</i>   | <i>VNTR</i>            | 7+ repeats          | 0.994         | 0.023        | 0.930 - 1.063 | 0.264 | 0.792 | 115,246 |
| <b>7</b>  | <i>DRD2</i>   | <i>rs1800497</i>       | T                   | 0.974         | 0.023        | 0.909 - 1.043 | 1.147 | 0.252 | 115,246 |
| <b>8</b>  | <i>MAOA</i>   | <i>VNTR</i>            | 2, 3, or 5 repeats  | 1.013         | 0.016        | 0.965 - 1.064 | 0.806 | 0.420 | 115,246 |
| <b>9</b>  | <i>APOE</i>   | <i>rs429358/rs7412</i> | $\epsilon$ -4       | 0.953         | 0.027        | 0.880 - 1.032 | 1.800 | 0.072 | 115,246 |
| <b>10</b> | <i>MTHFR</i>  | <i>rs1801133</i>       | T                   | 1.005         | 0.020        | 0.948 - 1.066 | 0.255 | 0.799 | 115,246 |
| <b>11</b> | <i>CLOCK</i>  | <i>rs1801260</i>       | C                   | 1.007         | 0.021        | 0.946 - 1.072 | 0.342 | 0.732 | 115,246 |
| <b>12</b> | <i>SLC6A3</i> | <i>VNTR</i>            | 10+ repeats         | 0.999         | 0.022        | 0.938 - 1.065 | 0.031 | 0.975 | 115,246 |
| <b>13</b> | <i>ACE</i>    | <i>in/del</i>          | deletion            | 1.001         | 0.019        | 0.946 - 1.058 | 0.029 | 0.977 | 115,246 |
| <b>14</b> | <i>ABCB1</i>  | <i>rs1045642</i>       | C                   | 1.039         | 0.019        | 0.982 - 1.099 | 2.018 | 0.044 | 115,246 |
| <b>15</b> | <i>DRD3</i>   | <i>rs6280</i>          | C                   | 0.974         | 0.020        | 0.919 - 1.033 | 1.315 | 0.189 | 115,246 |
| <b>16</b> | <i>DBH</i>    | <i>rs1611115</i>       | T                   | 0.985         | 0.024        | 0.919 - 1.057 | 0.627 | 0.531 | 113,463 |

*Note:* Negative binomial regression weights for current MDD severity on variant  $\times$  recent trauma controlling for sex, age, age<sup>2</sup>, 10 European ancestry principle components, testing center, batch and variant/moderator main effects.



Table S8.5: Conditional lifetime symptom count on variant  $\times$  childhood trauma

|    | Gene          | Polymorphism           | Risk/counted allele | $\beta$ | $se_{\beta}$ | Corrected CI   | $ z $ | $p$   | $n$    |
|----|---------------|------------------------|---------------------|---------|--------------|----------------|-------|-------|--------|
| 1  | <i>SLC6A4</i> | <i>5-HTTLPR</i>        | Low activity        | -0.012  | 0.022        | -0.077 - 0.054 | 0.524 | 0.601 | 62,108 |
| 2  | <i>BDNF</i>   | <i>rs6265</i>          | A                   | 0.006   | 0.028        | -0.079 - 0.090 | 0.198 | 0.843 | 62,108 |
| 3  | <i>COMT</i>   | <i>rs4680</i>          | G                   | 0.005   | 0.022        | -0.061 - 0.071 | 0.225 | 0.822 | 62,108 |
| 4  | <i>HTR2A</i>  | <i>rs6311</i>          | A                   | 0.009   | 0.023        | -0.058 - 0.076 | 0.401 | 0.688 | 62,108 |
| 5  | <i>TPH1</i>   | <i>rs1800532</i>       | A                   | 0.045   | 0.023        | -0.022 - 0.113 | 1.973 | 0.049 | 62,108 |
| 6  | <i>DRD4</i>   | <i>VNTR</i>            | 7+ repeats          | 0.015   | 0.027        | -0.065 - 0.094 | 0.542 | 0.588 | 62,108 |
| 7  | <i>DRD2</i>   | <i>rs1800497</i>       | T                   | 0.005   | 0.028        | -0.076 - 0.087 | 0.190 | 0.849 | 62,108 |
| 8  | <i>MAOA</i>   | <i>VNTR</i>            | 2, 3, or 5 repeats  | -0.019  | 0.020        | -0.078 - 0.041 | 0.927 | 0.354 | 62,108 |
| 9  | <i>APOE</i>   | <i>rs429358/rs7412</i> | $\epsilon$ -4       | 0.004   | 0.031        | -0.088 - 0.096 | 0.119 | 0.906 | 62,108 |
| 10 | <i>MTHFR</i>  | <i>rs1801133</i>       | T                   | -0.023  | 0.024        | -0.092 - 0.047 | 0.972 | 0.331 | 62,108 |
| 11 | <i>CLOCK</i>  | <i>rs1801260</i>       | C                   | -0.005  | 0.025        | -0.079 - 0.069 | 0.199 | 0.842 | 62,108 |
| 12 | <i>SLC6A3</i> | <i>VNTR</i>            | 10+ repeats         | -0.023  | 0.025        | -0.097 - 0.052 | 0.889 | 0.374 | 62,108 |
| 13 | <i>ACE</i>    | <i>in/del</i>          | deletion            | -0.007  | 0.022        | -0.072 - 0.059 | 0.299 | 0.765 | 62,108 |
| 14 | <i>ABCB1</i>  | <i>rs1045642</i>       | C                   | 0.031   | 0.022        | -0.035 - 0.097 | 1.403 | 0.161 | 62,108 |
| 15 | <i>DRD3</i>   | <i>rs6280</i>          | C                   | -0.049  | 0.024        | -0.118 - 0.021 | 2.071 | 0.038 | 62,108 |
| 16 | <i>DBH</i>    | <i>rs1611115</i>       | T                   | 0.001   | 0.028        | -0.081 - 0.083 | 0.036 | 0.972 | 61,178 |

Note: Linear regression weights for conditional lifetime symptom count on variant  $\times$  childhood trauma controlling for sex, age, age<sup>2</sup>, 10 European ancestry principle components, testing center, batch and variant/moderator main effects.

Table S8.6: Conditional lifetime symptom count on variant  $\times$  adult trauma

|    | Gene          | Polymorphism           | Risk/counted allele | $\beta$ | $se_{\beta}$ | Corrected CI   | $ z $ | $p$   | $n$    |
|----|---------------|------------------------|---------------------|---------|--------------|----------------|-------|-------|--------|
| 1  | <i>SLC6A4</i> | <i>5-HTTLPR</i>        | Low activity        | 0.001   | 0.020        | -0.057 - 0.059 | 0.056 | 0.956 | 62,135 |
| 2  | <i>BDNF</i>   | <i>rs6265</i>          | A                   | 0.026   | 0.025        | -0.049 - 0.101 | 1.041 | 0.298 | 62,135 |
| 3  | <i>COMT</i>   | <i>rs4680</i>          | G                   | -0.020  | 0.020        | -0.079 - 0.038 | 1.036 | 0.300 | 62,135 |
| 4  | <i>HTR2A</i>  | <i>rs6311</i>          | A                   | -0.001  | 0.020        | -0.061 - 0.059 | 0.044 | 0.965 | 62,135 |
| 5  | <i>TPH1</i>   | <i>rs1800532</i>       | A                   | 0.011   | 0.020        | -0.049 - 0.071 | 0.552 | 0.581 | 62,135 |
| 6  | <i>DRD4</i>   | <i>VNTR</i>            | 7+ repeats          | -0.023  | 0.024        | -0.093 - 0.047 | 0.964 | 0.335 | 62,135 |
| 7  | <i>DRD2</i>   | <i>rs1800497</i>       | T                   | 0.008   | 0.025        | -0.065 - 0.081 | 0.342 | 0.732 | 62,135 |
| 8  | <i>MAOA</i>   | <i>VNTR</i>            | 2, 3, or 5 repeats  | -0.022  | 0.018        | -0.075 - 0.032 | 1.202 | 0.229 | 62,135 |
| 9  | <i>APOE</i>   | <i>rs429358/rs7412</i> | $\epsilon$ -4       | -0.013  | 0.028        | -0.096 - 0.069 | 0.481 | 0.630 | 62,135 |
| 10 | <i>MTHFR</i>  | <i>rs1801133</i>       | T                   | 0.011   | 0.021        | -0.051 - 0.073 | 0.521 | 0.603 | 62,135 |
| 11 | <i>CLOCK</i>  | <i>rs1801260</i>       | C                   | 0.040   | 0.022        | -0.027 - 0.106 | 1.768 | 0.077 | 62,135 |
| 12 | <i>SLC6A3</i> | <i>VNTR</i>            | 10+ repeats         | -0.023  | 0.023        | -0.090 - 0.044 | 1.012 | 0.311 | 62,135 |
| 13 | <i>ACE</i>    | <i>in/del</i>          | deletion            | 0.023   | 0.020        | -0.036 - 0.082 | 1.168 | 0.243 | 62,135 |
| 14 | <i>ABCB1</i>  | <i>rs1045642</i>       | C                   | -0.004  | 0.020        | -0.062 - 0.055 | 0.196 | 0.845 | 62,135 |
| 15 | <i>DRD3</i>   | <i>rs6280</i>          | C                   | -0.020  | 0.021        | -0.082 - 0.042 | 0.941 | 0.347 | 62,135 |
| 16 | <i>DBH</i>    | <i>rs1611115</i>       | T                   | -0.033  | 0.025        | -0.106 - 0.041 | 1.310 | 0.190 | 61,205 |

Note: Linear regression weights for conditional lifetime symptom count on variant  $\times$  adult trauma controlling for sex, age, age<sup>2</sup>, 10 European ancestry principle components, testing center, batch and variant/moderator main effects.

Table S8.7: Conditional lifetime symptom count on variant  $\times$  TDI

|           | Gene          | Polymorphism           | Risk/counted allele | $\beta$ | $se_{\beta}$ | Corrected CI   | $ z $ | $p$   | $n$    |
|-----------|---------------|------------------------|---------------------|---------|--------------|----------------|-------|-------|--------|
| <b>1</b>  | <i>SLC6A4</i> | <i>5-HTTLPR</i>        | Low activity        | 0.008   | 0.011        | -0.024 - 0.039 | 0.740 | 0.459 | 62,069 |
| <b>2</b>  | <i>BDNF</i>   | <i>rs6265</i>          | A                   | 0.012   | 0.014        | -0.028 - 0.052 | 0.890 | 0.374 | 62,069 |
| <b>3</b>  | <i>COMT</i>   | <i>rs4680</i>          | G                   | 0.002   | 0.011        | -0.029 - 0.034 | 0.217 | 0.828 | 62,069 |
| <b>4</b>  | <i>HTR2A</i>  | <i>rs6311</i>          | A                   | 0.005   | 0.011        | -0.027 - 0.037 | 0.432 | 0.666 | 62,069 |
| <b>5</b>  | <i>TPH1</i>   | <i>rs1800532</i>       | A                   | -0.007  | 0.011        | -0.039 - 0.025 | 0.646 | 0.518 | 62,069 |
| <b>6</b>  | <i>DRD4</i>   | <i>VNTR</i>            | 7+ repeats          | 0.002   | 0.013        | -0.035 - 0.040 | 0.194 | 0.846 | 62,069 |
| <b>7</b>  | <i>DRD2</i>   | <i>rs1800497</i>       | T                   | -0.019  | 0.013        | -0.058 - 0.020 | 1.416 | 0.157 | 62,069 |
| <b>8</b>  | <i>MAOA</i>   | <i>VNTR</i>            | 2, 3, or 5 repeats  | -0.024  | 0.010        | -0.052 - 0.005 | 2.452 | 0.014 | 62,069 |
| <b>9</b>  | <i>APOE</i>   | <i>rs429358/rs7412</i> | $\epsilon$ -4       | 0.002   | 0.015        | -0.043 - 0.046 | 0.111 | 0.912 | 62,069 |
| <b>10</b> | <i>MTHFR</i>  | <i>rs1801133</i>       | T                   | 0.004   | 0.011        | -0.030 - 0.037 | 0.328 | 0.743 | 62,069 |
| <b>11</b> | <i>CLOCK</i>  | <i>rs1801260</i>       | C                   | 0.014   | 0.012        | -0.021 - 0.050 | 1.186 | 0.235 | 62,069 |
| <b>12</b> | <i>SLC6A3</i> | <i>VNTR</i>            | 10+ repeats         | 0.008   | 0.012        | -0.028 - 0.044 | 0.627 | 0.531 | 62,069 |
| <b>13</b> | <i>ACE</i>    | <i>in/del</i>          | deletion            | -0.010  | 0.011        | -0.042 - 0.021 | 0.974 | 0.330 | 62,069 |
| <b>14</b> | <i>ABCB1</i>  | <i>rs1045642</i>       | C                   | 0.002   | 0.011        | -0.030 - 0.033 | 0.169 | 0.866 | 62,069 |
| <b>15</b> | <i>DRD3</i>   | <i>rs6280</i>          | C                   | -0.004  | 0.011        | -0.037 - 0.029 | 0.351 | 0.726 | 62,069 |
| <b>16</b> | <i>DBH</i>    | <i>rs1611115</i>       | T                   | 0.005   | 0.013        | -0.034 - 0.044 | 0.362 | 0.717 | 61,139 |

*Note:* Linear regression weights for conditional lifetime symptom count on variant  $\times$  TDI controlling for sex, age, age<sup>2</sup>, 10 European ancestry principle components, testing center, batch, variant/moderator main effects, and all variant  $\times$  covariate and moderator  $\times$  covariate effects, on the additive scale.

Table S8.8: Conditional lifetime symptom count on variant  $\times$  stressor-induced depression

|           | Gene          | Polymorphism           | Risk/counted allele | $\beta$ | $se_{\beta}$ | Corrected CI   | $ z $ | $p$   | $n$    |
|-----------|---------------|------------------------|---------------------|---------|--------------|----------------|-------|-------|--------|
| <b>1</b>  | <i>SLC6A4</i> | <i>5-HTTLPR</i>        | Low activity        | -0.030  | 0.022        | -0.096 - 0.036 | 1.357 | 0.175 | 61,888 |
| <b>2</b>  | <i>BDNF</i>   | <i>rs6265</i>          | A                   | 0.007   | 0.029        | -0.078 - 0.092 | 0.234 | 0.815 | 61,888 |
| <b>3</b>  | <i>COMT</i>   | <i>rs4680</i>          | G                   | 0.045   | 0.022        | -0.021 - 0.111 | 2.017 | 0.044 | 61,888 |
| <b>4</b>  | <i>HTR2A</i>  | <i>rs6311</i>          | A                   | 0.026   | 0.023        | -0.041 - 0.093 | 1.138 | 0.255 | 61,888 |
| <b>5</b>  | <i>TPH1</i>   | <i>rs1800532</i>       | A                   | 0.015   | 0.023        | -0.053 - 0.083 | 0.644 | 0.519 | 61,888 |
| <b>6</b>  | <i>DRD4</i>   | <i>VNTR</i>            | 7+ repeats          | 0.037   | 0.027        | -0.043 - 0.116 | 1.353 | 0.176 | 61,888 |
| <b>7</b>  | <i>DRD2</i>   | <i>rs1800497</i>       | T                   | 0.038   | 0.028        | -0.045 - 0.121 | 1.365 | 0.172 | 61,888 |
| <b>8</b>  | <i>MAOA</i>   | <i>VNTR</i>            | 2, 3, or 5 repeats  | -0.010  | 0.020        | -0.069 - 0.049 | 0.507 | 0.612 | 61,888 |
| <b>9</b>  | <i>APOE</i>   | <i>rs429358/rs7412</i> | $\epsilon$ -4       | 0.023   | 0.031        | -0.070 - 0.116 | 0.735 | 0.462 | 61,888 |
| <b>10</b> | <i>MTHFR</i>  | <i>rs1801133</i>       | T                   | -0.025  | 0.024        | -0.096 - 0.045 | 1.072 | 0.284 | 61,888 |
| <b>11</b> | <i>CLOCK</i>  | <i>rs1801260</i>       | C                   | 0.023   | 0.025        | -0.052 - 0.098 | 0.907 | 0.364 | 61,888 |
| <b>12</b> | <i>SLC6A3</i> | <i>VNTR</i>            | 10+ repeats         | -0.001  | 0.026        | -0.077 - 0.075 | 0.027 | 0.979 | 61,888 |
| <b>13</b> | <i>ACE</i>    | <i>in/del</i>          | deletion            | 0.014   | 0.022        | -0.052 - 0.080 | 0.627 | 0.531 | 61,888 |
| <b>14</b> | <i>ABCB1</i>  | <i>rs1045642</i>       | C                   | 0.020   | 0.022        | -0.046 - 0.086 | 0.884 | 0.377 | 61,888 |
| <b>15</b> | <i>DRD3</i>   | <i>rs6280</i>          | C                   | -0.045  | 0.024        | -0.115 - 0.025 | 1.898 | 0.058 | 61,888 |
| <b>16</b> | <i>DBH</i>    | <i>rs1611115</i>       | T                   | 0.028   | 0.028        | -0.055 - 0.110 | 0.998 | 0.318 | 60,960 |

*Note:* Linear regression weights for conditional lifetime symptom count on variant  $\times$  stressor-induced depression controlling for sex, age, age<sup>2</sup>, 10 European ancestry principle components, testing center, batch and variant/moderator main effects.

Table S8.9: Lifetime episode count on variant  $\times$  childhood trauma

|           | Gene          | Polymorphism           | Risk/counted allele | $\exp(\beta)$ | $se_{\beta}$ | Corrected CI  | $ z $ | $p$   | $n$     |
|-----------|---------------|------------------------|---------------------|---------------|--------------|---------------|-------|-------|---------|
| <b>1</b>  | <i>SLC6A4</i> | <i>5-HTTLPR</i>        | Low activity        | 1.000         | 0.019        | 0.945 - 1.059 | 0.019 | 0.985 | 112,216 |
| <b>2</b>  | <i>BDNF</i>   | <i>rs6265</i>          | A                   | 1.018         | 0.025        | 0.946 - 1.096 | 0.718 | 0.473 | 112,216 |
| <b>3</b>  | <i>COMT</i>   | <i>rs4680</i>          | G                   | 0.983         | 0.019        | 0.929 - 1.041 | 0.863 | 0.388 | 112,216 |
| <b>4</b>  | <i>HTR2A</i>  | <i>rs6311</i>          | A                   | 0.974         | 0.020        | 0.919 - 1.033 | 1.321 | 0.186 | 112,216 |
| <b>5</b>  | <i>TPH1</i>   | <i>rs1800532</i>       | A                   | 0.996         | 0.020        | 0.939 - 1.056 | 0.204 | 0.839 | 112,216 |
| <b>6</b>  | <i>DRD4</i>   | <i>VNTR</i>            | 7+ repeats          | 1.002         | 0.023        | 0.935 - 1.074 | 0.085 | 0.932 | 112,216 |
| <b>7</b>  | <i>DRD2</i>   | <i>rs1800497</i>       | T                   | 1.003         | 0.024        | 0.934 - 1.077 | 0.122 | 0.903 | 112,216 |
| <b>8</b>  | <i>MAOA</i>   | <i>VNTR</i>            | 2, 3, or 5 repeats  | 0.983         | 0.017        | 0.935 - 1.035 | 0.974 | 0.330 | 112,216 |
| <b>9</b>  | <i>APOE</i>   | <i>rs429358/rs7412</i> | $\epsilon$ -4       | 1.025         | 0.027        | 0.946 - 1.111 | 0.913 | 0.361 | 112,216 |
| <b>10</b> | <i>MTHFR</i>  | <i>rs1801133</i>       | T                   | 0.970         | 0.021        | 0.913 - 1.031 | 1.486 | 0.137 | 112,216 |
| <b>11</b> | <i>CLOCK</i>  | <i>rs1801260</i>       | C                   | 1.001         | 0.022        | 0.938 - 1.068 | 0.050 | 0.960 | 112,216 |
| <b>12</b> | <i>SLC6A3</i> | <i>VNTR</i>            | 10+ repeats         | 0.973         | 0.022        | 0.911 - 1.039 | 1.228 | 0.219 | 112,216 |
| <b>13</b> | <i>ACE</i>    | <i>in/del</i>          | deletion            | 0.992         | 0.019        | 0.937 - 1.051 | 0.403 | 0.687 | 112,216 |
| <b>14</b> | <i>ABCB1</i>  | <i>rs1045642</i>       | C                   | 0.976         | 0.019        | 0.921 - 1.034 | 1.254 | 0.210 | 112,216 |
| <b>15</b> | <i>DRD3</i>   | <i>rs6280</i>          | C                   | 0.993         | 0.021        | 0.935 - 1.055 | 0.339 | 0.735 | 112,216 |
| <b>16</b> | <i>DBH</i>    | <i>rs1611115</i>       | T                   | 0.968         | 0.024        | 0.901 - 1.040 | 1.324 | 0.186 | 110,469 |

*Note:* Ordinal logistic regression weights for lifetime episode count on variant  $\times$  childhood trauma controlling for sex, age, age<sup>2</sup>, 10 European ancestry principle components, testing center, batch and variant/moderator main effects.

Table S8.10: Lifetime episode count on variant  $\times$  adult trauma

|           | Gene          | Polymorphism           | Risk/counted allele | $\exp(\beta)$ | $se_{\beta}$ | Corrected CI  | $ z $ | $p$   | $n$     |
|-----------|---------------|------------------------|---------------------|---------------|--------------|---------------|-------|-------|---------|
| <b>1</b>  | <i>SLC6A4</i> | <i>5-HTTLPR</i>        | Low activity        | 1.007         | 0.016        | 0.960 - 1.058 | 0.453 | 0.650 | 112,255 |
| <b>2</b>  | <i>BDNF</i>   | <i>rs6265</i>          | A                   | 0.985         | 0.021        | 0.925 - 1.048 | 0.720 | 0.471 | 112,255 |
| <b>3</b>  | <i>COMT</i>   | <i>rs4680</i>          | G                   | 0.997         | 0.016        | 0.949 - 1.047 | 0.192 | 0.848 | 112,255 |
| <b>4</b>  | <i>HTR2A</i>  | <i>rs6311</i>          | A                   | 0.998         | 0.017        | 0.950 - 1.049 | 0.102 | 0.919 | 112,255 |
| <b>5</b>  | <i>TPH1</i>   | <i>rs1800532</i>       | A                   | 1.011         | 0.017        | 0.961 - 1.063 | 0.634 | 0.526 | 112,255 |
| <b>6</b>  | <i>DRD4</i>   | <i>VNTR</i>            | 7+ repeats          | 1.004         | 0.020        | 0.947 - 1.065 | 0.226 | 0.821 | 112,255 |
| <b>7</b>  | <i>DRD2</i>   | <i>rs1800497</i>       | T                   | 1.011         | 0.021        | 0.951 - 1.074 | 0.518 | 0.605 | 112,255 |
| <b>8</b>  | <i>MAOA</i>   | <i>VNTR</i>            | 2, 3, or 5 repeats  | 1.007         | 0.015        | 0.964 - 1.052 | 0.442 | 0.658 | 112,255 |
| <b>9</b>  | <i>APOE</i>   | <i>rs429358/rs7412</i> | $\epsilon$ -4       | 1.001         | 0.023        | 0.935 - 1.072 | 0.059 | 0.953 | 112,255 |
| <b>10</b> | <i>MTHFR</i>  | <i>rs1801133</i>       | T                   | 1.034         | 0.018        | 0.982 - 1.089 | 1.896 | 0.058 | 112,255 |
| <b>11</b> | <i>CLOCK</i>  | <i>rs1801260</i>       | C                   | 0.997         | 0.019        | 0.944 - 1.054 | 0.149 | 0.882 | 112,255 |
| <b>12</b> | <i>SLC6A3</i> | <i>VNTR</i>            | 10+ repeats         | 1.002         | 0.019        | 0.947 - 1.060 | 0.102 | 0.919 | 112,255 |
| <b>13</b> | <i>ACE</i>    | <i>in/del</i>          | deletion            | 0.999         | 0.017        | 0.951 - 1.049 | 0.083 | 0.934 | 112,255 |
| <b>14</b> | <i>ABCB1</i>  | <i>rs1045642</i>       | C                   | 0.999         | 0.017        | 0.952 - 1.050 | 0.037 | 0.971 | 112,255 |
| <b>15</b> | <i>DRD3</i>   | <i>rs6280</i>          | C                   | 0.978         | 0.017        | 0.929 - 1.029 | 1.293 | 0.196 | 112,255 |
| <b>16</b> | <i>DBH</i>    | <i>rs1611115</i>       | T                   | 0.987         | 0.021        | 0.928 - 1.049 | 0.644 | 0.519 | 110,507 |

*Note:* Ordinal logistic regression weights for lifetime episode count on variant  $\times$  adult trauma controlling for sex, age, age<sup>2</sup>, 10 European ancestry principle components, testing center, batch and variant/moderator main effects.

Table S8.11: Lifetime episode count on variant  $\times$  TDI

|           | Gene          | Polymorphism           | Risk/counted allele | $\exp(\beta)$ | $se_{\beta}$ | Corrected CI  | $ z $ | $p$   | $n$     |
|-----------|---------------|------------------------|---------------------|---------------|--------------|---------------|-------|-------|---------|
| <b>1</b>  | <i>SLC6A4</i> | <i>5-HTTLPR</i>        | Low activity        | 1.019         | 0.009        | 0.992 - 1.046 | 2.042 | 0.041 | 112,144 |
| <b>2</b>  | <i>BDNF</i>   | <i>rs6265</i>          | A                   | 1.021         | 0.012        | 0.987 - 1.056 | 1.790 | 0.073 | 112,144 |
| <b>3</b>  | <i>COMT</i>   | <i>rs4680</i>          | G                   | 1.012         | 0.009        | 0.985 - 1.039 | 1.272 | 0.204 | 112,144 |
| <b>4</b>  | <i>HTR2A</i>  | <i>rs6311</i>          | A                   | 1.006         | 0.009        | 0.978 - 1.033 | 0.602 | 0.547 | 112,144 |
| <b>5</b>  | <i>TPH1</i>   | <i>rs1800532</i>       | A                   | 1.004         | 0.009        | 0.977 - 1.032 | 0.467 | 0.641 | 112,144 |
| <b>6</b>  | <i>DRD4</i>   | <i>VNTR</i>            | 7+ repeats          | 1.005         | 0.011        | 0.972 - 1.037 | 0.439 | 0.661 | 112,144 |
| <b>7</b>  | <i>DRD2</i>   | <i>rs1800497</i>       | T                   | 1.009         | 0.011        | 0.975 - 1.042 | 0.752 | 0.452 | 112,144 |
| <b>8</b>  | <i>MAOA</i>   | <i>VNTR</i>            | 2, 3, or 5 repeats  | 1.001         | 0.008        | 0.977 - 1.025 | 0.173 | 0.862 | 112,144 |
| <b>9</b>  | <i>APOE</i>   | <i>rs429358/rs7412</i> | $\epsilon$ -4       | 1.005         | 0.013        | 0.967 - 1.043 | 0.408 | 0.684 | 112,144 |
| <b>10</b> | <i>MTHFR</i>  | <i>rs1801133</i>       | T                   | 1.002         | 0.010        | 0.974 - 1.031 | 0.251 | 0.802 | 112,144 |
| <b>11</b> | <i>CLOCK</i>  | <i>rs1801260</i>       | C                   | 1.026         | 0.010        | 0.995 - 1.056 | 2.455 | 0.014 | 112,144 |
| <b>12</b> | <i>SLC6A3</i> | <i>VNTR</i>            | 10+ repeats         | 1.005         | 0.010        | 0.974 - 1.035 | 0.436 | 0.663 | 112,144 |
| <b>13</b> | <i>ACE</i>    | <i>in/del</i>          | deletion            | 1.015         | 0.009        | 0.988 - 1.042 | 1.612 | 0.107 | 112,144 |
| <b>14</b> | <i>ABCB1</i>  | <i>rs1045642</i>       | C                   | 1.017         | 0.009        | 0.990 - 1.044 | 1.868 | 0.062 | 112,144 |
| <b>15</b> | <i>DRD3</i>   | <i>rs6280</i>          | C                   | 1.001         | 0.010        | 0.973 - 1.030 | 0.125 | 0.901 | 112,144 |
| <b>16</b> | <i>DBH</i>    | <i>rs1611115</i>       | T                   | 1.014         | 0.011        | 0.981 - 1.048 | 1.255 | 0.210 | 110,397 |

*Note:* Ordinal logistic regression weights for lifetime episode count on variant  $\times$  TDI controlling for sex, age, age<sup>2</sup>, 10 European ancestry principle components, testing center, batch, variant/moderator main effects, and all variant  $\times$  covariate and moderator  $\times$  covariate effects, on the multiplicative scale.

Table S8.12: Touchscreen probable lifetime diagnosis on variant  $\times$  TDI

|           | Gene          | Polymorphism           | Risk/counted allele | $\exp(\beta)$ | $se_{\beta}$ | Corrected CI  | $ z $ | $p$   | $n$    |
|-----------|---------------|------------------------|---------------------|---------------|--------------|---------------|-------|-------|--------|
| <b>1</b>  | <i>SLC6A4</i> | <i>5-HTTLPR</i>        | Low activity        | 1.007         | 0.012        | 0.972 - 1.042 | 0.592 | 0.554 | 90,812 |
| <b>2</b>  | <i>BDNF</i>   | <i>rs6265</i>          | A                   | 1.013         | 0.015        | 0.969 - 1.058 | 0.873 | 0.383 | 90,812 |
| <b>3</b>  | <i>COMT</i>   | <i>rs4680</i>          | G                   | 1.012         | 0.012        | 0.977 - 1.047 | 1.028 | 0.304 | 90,812 |
| <b>4</b>  | <i>HTR2A</i>  | <i>rs6311</i>          | A                   | 1.001         | 0.012        | 0.966 - 1.037 | 0.120 | 0.904 | 90,812 |
| <b>5</b>  | <i>TPH1</i>   | <i>rs1800532</i>       | A                   | 1.016         | 0.012        | 0.980 - 1.051 | 1.308 | 0.191 | 90,812 |
| <b>6</b>  | <i>DRD4</i>   | <i>VNTR</i>            | 7+ repeats          | 1.002         | 0.014        | 0.960 - 1.044 | 0.156 | 0.876 | 90,812 |
| <b>7</b>  | <i>DRD2</i>   | <i>rs1800497</i>       | T                   | 1.017         | 0.015        | 0.973 - 1.060 | 1.121 | 0.262 | 90,812 |
| <b>8</b>  | <i>MAOA</i>   | <i>VNTR</i>            | 2, 3, or 5 repeats  | 1.003         | 0.010        | 0.972 - 1.034 | 0.297 | 0.766 | 90,812 |
| <b>9</b>  | <i>APOE</i>   | <i>rs429358/rs7412</i> | $\epsilon$ -4       | 1.022         | 0.016        | 0.974 - 1.070 | 1.339 | 0.180 | 90,812 |
| <b>10</b> | <i>MTHFR</i>  | <i>rs1801133</i>       | T                   | 1.011         | 0.012        | 0.974 - 1.047 | 0.846 | 0.398 | 90,812 |
| <b>11</b> | <i>CLOCK</i>  | <i>rs1801260</i>       | C                   | 1.009         | 0.013        | 0.969 - 1.048 | 0.661 | 0.509 | 90,812 |
| <b>12</b> | <i>SLC6A3</i> | <i>VNTR</i>            | 10+ repeats         | 1.020         | 0.013        | 0.980 - 1.060 | 1.484 | 0.138 | 90,812 |
| <b>13</b> | <i>ACE</i>    | <i>in/del</i>          | deletion            | 1.003         | 0.012        | 0.968 - 1.038 | 0.236 | 0.814 | 90,812 |
| <b>14</b> | <i>ABCB1</i>  | <i>rs1045642</i>       | C                   | 1.015         | 0.012        | 0.980 - 1.050 | 1.244 | 0.213 | 90,812 |
| <b>15</b> | <i>DRD3</i>   | <i>rs6280</i>          | C                   | 1.017         | 0.012        | 0.980 - 1.053 | 1.320 | 0.187 | 90,812 |
| <b>16</b> | <i>DBH</i>    | <i>rs1611115</i>       | T                   | 1.011         | 0.015        | 0.967 - 1.054 | 0.719 | 0.472 | 89,397 |

*Note:* Logistic regression weights for touchscreen probable lifetime diagnosis on variant  $\times$  TDI controlling for sex, age, age<sup>2</sup>, 10 European ancestry principle components, testing center, batch, variant/moderator main effects, and all variant  $\times$  covariate and moderator  $\times$  covariate effects, on the multiplicative scale.

Table S8.13: Touchscreen probable lifetime diagnosis, ordinal classification on variant  $\times$  TDI

|           | Gene          | Polymorphism           | Risk/counted allele | $\exp(\beta)$ | $se_{\beta}$ | Corrected CI  | $ z $ | $p$   | $n$    |
|-----------|---------------|------------------------|---------------------|---------------|--------------|---------------|-------|-------|--------|
| <b>1</b>  | <i>SLC6A4</i> | <i>5-HTTLPR</i>        | Low activity        | 1.009         | 0.012        | 0.975 - 1.043 | 0.743 | 0.457 | 90,812 |
| <b>2</b>  | <i>BDNF</i>   | <i>rs6265</i>          | A                   | 1.018         | 0.015        | 0.975 - 1.062 | 1.234 | 0.217 | 90,812 |
| <b>3</b>  | <i>COMT</i>   | <i>rs4680</i>          | G                   | 1.007         | 0.012        | 0.973 - 1.041 | 0.600 | 0.548 | 90,812 |
| <b>4</b>  | <i>HTR2A</i>  | <i>rs6311</i>          | A                   | 1.005         | 0.012        | 0.970 - 1.040 | 0.410 | 0.682 | 90,812 |
| <b>5</b>  | <i>TPH1</i>   | <i>rs1800532</i>       | A                   | 1.016         | 0.012        | 0.981 - 1.051 | 1.343 | 0.179 | 90,812 |
| <b>6</b>  | <i>DRD4</i>   | <i>VNTR</i>            | 7+ repeats          | 1.001         | 0.014        | 0.960 - 1.042 | 0.101 | 0.920 | 90,812 |
| <b>7</b>  | <i>DRD2</i>   | <i>rs1800497</i>       | T                   | 1.006         | 0.014        | 0.963 - 1.049 | 0.406 | 0.685 | 90,812 |
| <b>8</b>  | <i>MAOA</i>   | <i>VNTR</i>            | 2, 3, or 5 repeats  | 1.005         | 0.010        | 0.975 - 1.035 | 0.474 | 0.636 | 90,812 |
| <b>9</b>  | <i>APOE</i>   | <i>rs429358/rs7412</i> | $\epsilon$ -4       | 1.026         | 0.016        | 0.978 - 1.073 | 1.585 | 0.113 | 90,812 |
| <b>10</b> | <i>MTHFR</i>  | <i>rs1801133</i>       | T                   | 1.009         | 0.012        | 0.973 - 1.045 | 0.740 | 0.459 | 90,812 |
| <b>11</b> | <i>CLOCK</i>  | <i>rs1801260</i>       | C                   | 1.002         | 0.013        | 0.963 - 1.040 | 0.122 | 0.903 | 90,812 |
| <b>12</b> | <i>SLC6A3</i> | <i>VNTR</i>            | 10+ repeats         | 1.018         | 0.013        | 0.979 - 1.057 | 1.346 | 0.178 | 90,812 |
| <b>13</b> | <i>ACE</i>    | <i>in/del</i>          | deletion            | 1.002         | 0.012        | 0.967 - 1.036 | 0.147 | 0.883 | 90,812 |
| <b>14</b> | <i>ABCB1</i>  | <i>rs1045642</i>       | C                   | 1.013         | 0.012        | 0.979 - 1.047 | 1.095 | 0.273 | 90,812 |
| <b>15</b> | <i>DRD3</i>   | <i>rs6280</i>          | C                   | 1.014         | 0.012        | 0.978 - 1.050 | 1.171 | 0.242 | 90,812 |
| <b>16</b> | <i>DBH</i>    | <i>rs1611115</i>       | T                   | 1.011         | 0.014        | 0.969 - 1.053 | 0.755 | 0.450 | 89,397 |

*Note:* Ordinal logistic regression weights for touchscreen probable lifetime diagnosis, ordinal classification on variant  $\times$  TDI controlling for sex, age, age<sup>2</sup>, 10 European ancestry principle components, testing center, batch, variant/moderator main effects, and all variant  $\times$  covariate and moderator  $\times$  covariate effects, on the multiplicative scale.

Table S8.14: Severe recurrent MDD (MHF) on variant  $\times$  adult trauma

|           | Gene          | Polymorphism           | Risk/counted allele | $\exp(\beta)$ | $se_{\beta}$ | Corrected CI   | $ z $ | $p$   | $n$    |
|-----------|---------------|------------------------|---------------------|---------------|--------------|----------------|-------|-------|--------|
| <b>1</b>  | <i>SLC6A4</i> | <i>5-HTTLPR</i>        | Low activity        | 0.016         | 0.014        | -0.027 - 0.058 | 1.089 | 0.276 | 67,304 |
| <b>2</b>  | <i>BDNF</i>   | <i>rs6265</i>          | A                   | -0.009        | 0.019        | -0.064 - 0.047 | 0.461 | 0.645 | 67,304 |
| <b>3</b>  | <i>COMT</i>   | <i>rs4680</i>          | G                   | 0.004         | 0.015        | -0.039 - 0.047 | 0.254 | 0.800 | 67,304 |
| <b>4</b>  | <i>HTR2A</i>  | <i>rs6311</i>          | A                   | -0.006        | 0.015        | -0.050 - 0.037 | 0.437 | 0.662 | 67,304 |
| <b>5</b>  | <i>TPH1</i>   | <i>rs1800532</i>       | A                   | -0.021        | 0.015        | -0.065 - 0.022 | 1.441 | 0.150 | 67,304 |
| <b>6</b>  | <i>DRD4</i>   | <i>VNTR</i>            | 7+ repeats          | -0.012        | 0.018        | -0.064 - 0.040 | 0.682 | 0.495 | 67,304 |
| <b>7</b>  | <i>DRD2</i>   | <i>rs1800497</i>       | T                   | -0.013        | 0.018        | -0.065 - 0.040 | 0.724 | 0.469 | 67,304 |
| <b>8</b>  | <i>MAOA</i>   | <i>VNTR</i>            | 2, 3, or 5 repeats  | 0.001         | 0.013        | -0.038 - 0.040 | 0.063 | 0.950 | 67,304 |
| <b>9</b>  | <i>APOE</i>   | <i>rs429358/rs7412</i> | $\epsilon$ -4       | 0.000         | 0.021        | -0.060 - 0.061 | 0.022 | 0.982 | 67,304 |
| <b>10</b> | <i>MTHFR</i>  | <i>rs1801133</i>       | T                   | -0.001        | 0.015        | -0.046 - 0.044 | 0.070 | 0.944 | 67,304 |
| <b>11</b> | <i>CLOCK</i>  | <i>rs1801260</i>       | C                   | -0.002        | 0.016        | -0.050 - 0.046 | 0.099 | 0.921 | 67,304 |
| <b>12</b> | <i>SLC6A3</i> | <i>VNTR</i>            | 10+ repeats         | 0.001         | 0.017        | -0.048 - 0.050 | 0.070 | 0.944 | 67,304 |
| <b>13</b> | <i>ACE</i>    | <i>in/del</i>          | deletion            | 0.002         | 0.014        | -0.040 - 0.045 | 0.162 | 0.871 | 67,304 |
| <b>14</b> | <i>ABCB1</i>  | <i>rs1045642</i>       | C                   | -0.002        | 0.015        | -0.045 - 0.041 | 0.115 | 0.908 | 67,304 |
| <b>15</b> | <i>DRD3</i>   | <i>rs6280</i>          | C                   | -0.025        | 0.015        | -0.070 - 0.020 | 1.655 | 0.098 | 67,304 |
| <b>16</b> | <i>DBH</i>    | <i>rs1611115</i>       | T                   | -0.002        | 0.018        | -0.055 - 0.051 | 0.092 | 0.927 | 66,231 |

*Note:* Linear regression weights for Severe recurrent MDD (MHF) on variant  $\times$  adult trauma controlling for sex, age, age<sup>2</sup>, 10 European ancestry principle components, testing center, batch, variant/moderator main effects, and all variant  $\times$  covariate and moderator  $\times$  covariate effects, on the multiplicative scale.

Table S8.15: Severe recurrent MDD (MHF) on variant  $\times$  childhood trauma

|           | Gene          | Polymorphism           | Risk/counted allele | $\exp(\beta)$ | $se_{\beta}$ | Corrected CI   | $ z $ | $p$   | $n$    |
|-----------|---------------|------------------------|---------------------|---------------|--------------|----------------|-------|-------|--------|
| <b>1</b>  | <i>SLC6A4</i> | <i>5-HTTLPR</i>        | Low activity        | 0.008         | 0.014        | -0.032 - 0.048 | 0.586 | 0.558 | 67,304 |
| <b>2</b>  | <i>BDNF</i>   | <i>rs6265</i>          | A                   | 0.021         | 0.018        | -0.032 - 0.073 | 1.162 | 0.245 | 67,304 |
| <b>3</b>  | <i>COMT</i>   | <i>rs4680</i>          | G                   | 0.012         | 0.014        | -0.028 - 0.052 | 0.885 | 0.376 | 67,304 |
| <b>4</b>  | <i>HTR2A</i>  | <i>rs6311</i>          | A                   | 0.018         | 0.014        | -0.024 - 0.059 | 1.262 | 0.207 | 67,304 |
| <b>5</b>  | <i>TPH1</i>   | <i>rs1800532</i>       | A                   | -0.008        | 0.014        | -0.050 - 0.033 | 0.597 | 0.551 | 67,304 |
| <b>6</b>  | <i>DRD4</i>   | <i>VNTR</i>            | 7+ repeats          | -0.004        | 0.016        | -0.052 - 0.044 | 0.241 | 0.810 | 67,304 |
| <b>7</b>  | <i>DRD2</i>   | <i>rs1800497</i>       | T                   | -0.006        | 0.017        | -0.056 - 0.044 | 0.364 | 0.716 | 67,304 |
| <b>8</b>  | <i>MAOA</i>   | <i>VNTR</i>            | 2, 3, or 5 repeats  | -0.009        | 0.013        | -0.046 - 0.028 | 0.699 | 0.485 | 67,304 |
| <b>9</b>  | <i>APOE</i>   | <i>rs429358/rs7412</i> | $\epsilon$ -4       | 0.006         | 0.019        | -0.052 - 0.063 | 0.291 | 0.771 | 67,304 |
| <b>10</b> | <i>MTHFR</i>  | <i>rs1801133</i>       | T                   | 0.027         | 0.014        | -0.016 - 0.070 | 1.870 | 0.061 | 67,304 |
| <b>11</b> | <i>CLOCK</i>  | <i>rs1801260</i>       | C                   | -0.003        | 0.015        | -0.049 - 0.042 | 0.229 | 0.819 | 67,304 |
| <b>12</b> | <i>SLC6A3</i> | <i>VNTR</i>            | 10+ repeats         | -0.024        | 0.016        | -0.070 - 0.022 | 1.522 | 0.128 | 67,304 |
| <b>13</b> | <i>ACE</i>    | <i>in/del</i>          | deletion            | 0.011         | 0.014        | -0.030 - 0.051 | 0.773 | 0.440 | 67,304 |
| <b>14</b> | <i>ABCB1</i>  | <i>rs1045642</i>       | C                   | 0.006         | 0.014        | -0.034 - 0.046 | 0.438 | 0.661 | 67,304 |
| <b>15</b> | <i>DRD3</i>   | <i>rs6280</i>          | C                   | -0.008        | 0.014        | -0.050 - 0.035 | 0.528 | 0.597 | 67,304 |
| <b>16</b> | <i>DBH</i>    | <i>rs1611115</i>       | T                   | -0.024        | 0.017        | -0.075 - 0.026 | 1.430 | 0.153 | 66,231 |

*Note:* Logistic regression weights for Severe recurrent MDD (MHF) on variant  $\times$  childhood trauma controlling for sex, age, age<sup>2</sup>, 10 European ancestry principle components, testing center, batch, variant/moderator main effects, and all variant  $\times$  covariate and moderator  $\times$  covariate effects, on the multiplicative scale.

Table S8.16: Severe recurrent MDD (MHF) on variant  $\times$  TDI

|           | Gene          | Polymorphism           | Risk/counted allele | $\exp(\beta)$ | $se_{\beta}$ | Corrected CI  | $ z $ | $p$   | $n$    |
|-----------|---------------|------------------------|---------------------|---------------|--------------|---------------|-------|-------|--------|
| <b>1</b>  | <i>SLC6A4</i> | <i>5-HTTLPR</i>        | Low activity        | 1.009         | 0.005        | 0.994 - 1.024 | 1.768 | 0.077 | 67,237 |
| <b>2</b>  | <i>BDNF</i>   | <i>rs6265</i>          | A                   | 1.012         | 0.007        | 0.992 - 1.031 | 1.755 | 0.079 | 67,237 |
| <b>3</b>  | <i>COMT</i>   | <i>rs4680</i>          | G                   | 1.005         | 0.005        | 0.990 - 1.020 | 1.044 | 0.296 | 67,237 |
| <b>4</b>  | <i>HTR2A</i>  | <i>rs6311</i>          | A                   | 1.001         | 0.005        | 0.985 - 1.016 | 0.147 | 0.883 | 67,237 |
| <b>5</b>  | <i>TPH1</i>   | <i>rs1800532</i>       | A                   | 1.001         | 0.005        | 0.985 - 1.016 | 0.135 | 0.893 | 67,237 |
| <b>6</b>  | <i>DRD4</i>   | <i>VNTR</i>            | 7+ repeats          | 1.009         | 0.006        | 0.991 - 1.027 | 1.418 | 0.156 | 67,237 |
| <b>7</b>  | <i>DRD2</i>   | <i>rs1800497</i>       | T                   | 1.002         | 0.006        | 0.983 - 1.021 | 0.368 | 0.713 | 67,237 |
| <b>8</b>  | <i>MAOA</i>   | <i>VNTR</i>            | 2, 3, or 5 repeats  | 1.004         | 0.005        | 0.990 - 1.017 | 0.757 | 0.449 | 67,237 |
| <b>9</b>  | <i>APOE</i>   | <i>rs429358/rs7412</i> | $\epsilon$ -4       | 1.005         | 0.007        | 0.983 - 1.026 | 0.628 | 0.530 | 67,237 |
| <b>10</b> | <i>MTHFR</i>  | <i>rs1801133</i>       | T                   | 1.001         | 0.005        | 0.985 - 1.017 | 0.179 | 0.858 | 67,237 |
| <b>11</b> | <i>CLOCK</i>  | <i>rs1801260</i>       | C                   | 1.015         | 0.006        | 0.997 - 1.032 | 2.496 | 0.013 | 67,237 |
| <b>12</b> | <i>SLC6A3</i> | <i>VNTR</i>            | 10+ repeats         | 1.007         | 0.006        | 0.989 - 1.024 | 1.127 | 0.260 | 67,237 |
| <b>13</b> | <i>ACE</i>    | <i>in/del</i>          | deletion            | 1.007         | 0.005        | 0.992 - 1.022 | 1.316 | 0.188 | 67,237 |
| <b>14</b> | <i>ABCB1</i>  | <i>rs1045642</i>       | C                   | 1.002         | 0.005        | 0.987 - 1.017 | 0.351 | 0.726 | 67,237 |
| <b>15</b> | <i>DRD3</i>   | <i>rs6280</i>          | C                   | 1.003         | 0.005        | 0.987 - 1.019 | 0.602 | 0.547 | 67,237 |
| <b>16</b> | <i>DBH</i>    | <i>rs1611115</i>       | T                   | 1.008         | 0.006        | 0.989 - 1.027 | 1.222 | 0.222 | 66,165 |

*Note:* Logistic regression weights for Severe recurrent MDD (MHF) on variant  $\times$  TDI controlling for sex, age, age<sup>2</sup>, 10 European ancestry principle components, testing center, batch, variant/moderator main effects, and all variant  $\times$  covariate and moderator  $\times$  covariate effects, on the multiplicative scale.

## S9 Polymorphism level $G \times E$ effects (alternate scale)

Table S9.1: Estimated lifetime MDD diagnosis on variant  $\times$  childhood trauma, alternate scale

|           | Gene          | Polymorphism           | Risk/counted allele | $\beta$ | $se_{\beta}$ | Corrected CI   | $ z $ | $p$   | $n$     |
|-----------|---------------|------------------------|---------------------|---------|--------------|----------------|-------|-------|---------|
| <b>1</b>  | <i>SLC6A4</i> | <i>5-HTTLPR</i>        | Low activity        | -0.000  | 0.004        | -0.013 - 0.012 | 0.104 | 0.917 | 115,204 |
| <b>2</b>  | <i>BDNF</i>   | <i>rs6265</i>          | A                   | 0.002   | 0.006        | -0.015 - 0.018 | 0.298 | 0.766 | 115,204 |
| <b>3</b>  | <i>COMT</i>   | <i>rs4680</i>          | G                   | -0.003  | 0.004        | -0.016 - 0.010 | 0.701 | 0.483 | 115,204 |
| <b>4</b>  | <i>HTR2A</i>  | <i>rs6311</i>          | A                   | -0.008  | 0.004        | -0.021 - 0.005 | 1.798 | 0.072 | 115,204 |
| <b>5</b>  | <i>TPH1</i>   | <i>rs1800532</i>       | A                   | 0.005   | 0.004        | -0.008 - 0.018 | 1.176 | 0.240 | 115,204 |
| <b>6</b>  | <i>DRD4</i>   | <i>VNTR</i>            | 7+ repeats          | -0.001  | 0.005        | -0.016 - 0.014 | 0.174 | 0.862 | 115,204 |
| <b>7</b>  | <i>DRD2</i>   | <i>rs1800497</i>       | T                   | -0.006  | 0.005        | -0.021 - 0.010 | 1.030 | 0.303 | 115,204 |
| <b>8</b>  | <i>MAOA</i>   | <i>VNTR</i>            | 2, 3, or 5 repeats  | -0.003  | 0.004        | -0.014 - 0.008 | 0.851 | 0.395 | 115,204 |
| <b>9</b>  | <i>APOE</i>   | <i>rs429358/rs7412</i> | $\epsilon$ -4       | 0.007   | 0.006        | -0.011 - 0.025 | 1.129 | 0.259 | 115,204 |
| <b>10</b> | <i>MTHFR</i>  | <i>rs1801133</i>       | T                   | -0.002  | 0.005        | -0.015 - 0.012 | 0.345 | 0.730 | 115,204 |
| <b>11</b> | <i>CLOCK</i>  | <i>rs1801260</i>       | C                   | -0.001  | 0.005        | -0.015 - 0.014 | 0.157 | 0.875 | 115,204 |
| <b>12</b> | <i>SLC6A3</i> | <i>VNTR</i>            | 10+ repeats         | -0.008  | 0.005        | -0.023 - 0.006 | 1.650 | 0.099 | 115,204 |
| <b>13</b> | <i>ACE</i>    | <i>in/del</i>          | deletion            | 0.001   | 0.004        | -0.012 - 0.014 | 0.269 | 0.788 | 115,204 |
| <b>14</b> | <i>ABCB1</i>  | <i>rs1045642</i>       | C                   | -0.006  | 0.004        | -0.019 - 0.007 | 1.403 | 0.160 | 115,204 |
| <b>15</b> | <i>DRD3</i>   | <i>rs6280</i>          | C                   | -0.009  | 0.005        | -0.022 - 0.005 | 1.894 | 0.058 | 115,204 |
| <b>16</b> | <i>DBH</i>    | <i>rs1611115</i>       | T                   | -0.008  | 0.005        | -0.024 - 0.008 | 1.440 | 0.150 | 113,422 |

*Note:* Linear regression weights for estimated lifetime MDD diagnosis on variant  $\times$  childhood trauma controlling for sex, age, age<sup>2</sup>, 10 European ancestry principle components, testing center, batch, variant/moderator main effects, and all variant  $\times$  covariate and moderator  $\times$  covariate effects, on the additive scale.

Table S9.2: Estimated lifetime MDD diagnosis on variant  $\times$  adult trauma, alternate scale

|           | Gene          | Polymorphism           | Risk/counted allele | $\exp(\beta)$ | $se_{\beta}$ | Corrected CI  | $ z $ | $p$   | $n$     |
|-----------|---------------|------------------------|---------------------|---------------|--------------|---------------|-------|-------|---------|
| <b>1</b>  | <i>SLC6A4</i> | <i>5-HTTLPR</i>        | Low activity        | 1.003         | 0.004        | 0.992 - 1.014 | 0.780 | 0.435 | 115,249 |
| <b>2</b>  | <i>BDNF</i>   | <i>rs6265</i>          | A                   | 0.999         | 0.005        | 0.986 - 1.013 | 0.152 | 0.880 | 115,249 |
| <b>3</b>  | <i>COMT</i>   | <i>rs4680</i>          | G                   | 0.999         | 0.004        | 0.988 - 1.010 | 0.325 | 0.745 | 115,249 |
| <b>4</b>  | <i>HTR2A</i>  | <i>rs6311</i>          | A                   | 1.001         | 0.004        | 0.990 - 1.012 | 0.274 | 0.784 | 115,249 |
| <b>5</b>  | <i>TPH1</i>   | <i>rs1800532</i>       | A                   | 1.004         | 0.004        | 0.993 - 1.016 | 1.180 | 0.238 | 115,249 |
| <b>6</b>  | <i>DRD4</i>   | <i>VNTR</i>            | 7+ repeats          | 0.996         | 0.004        | 0.983 - 1.009 | 0.871 | 0.384 | 115,249 |
| <b>7</b>  | <i>DRD2</i>   | <i>rs1800497</i>       | T                   | 1.002         | 0.005        | 0.989 - 1.015 | 0.432 | 0.666 | 115,249 |
| <b>8</b>  | <i>MAOA</i>   | <i>VNTR</i>            | 2, 3, or 5 repeats  | 0.998         | 0.003        | 0.988 - 1.007 | 0.754 | 0.451 | 115,249 |
| <b>9</b>  | <i>APOE</i>   | <i>rs429358/rs7412</i> | $\epsilon$ -4       | 0.997         | 0.005        | 0.982 - 1.012 | 0.567 | 0.571 | 115,249 |
| <b>10</b> | <i>MTHFR</i>  | <i>rs1801133</i>       | T                   | 1.007         | 0.004        | 0.996 - 1.019 | 1.930 | 0.054 | 115,249 |
| <b>11</b> | <i>CLOCK</i>  | <i>rs1801260</i>       | C                   | 1.001         | 0.004        | 0.989 - 1.013 | 0.147 | 0.883 | 115,249 |
| <b>12</b> | <i>SLC6A3</i> | <i>VNTR</i>            | 10+ repeats         | 0.998         | 0.004        | 0.986 - 1.010 | 0.512 | 0.609 | 115,249 |
| <b>13</b> | <i>ACE</i>    | <i>in/del</i>          | deletion            | 1.000         | 0.004        | 0.989 - 1.011 | 0.004 | 0.997 | 115,249 |
| <b>14</b> | <i>ABCB1</i>  | <i>rs1045642</i>       | C                   | 0.997         | 0.004        | 0.986 - 1.008 | 0.790 | 0.430 | 115,249 |
| <b>15</b> | <i>DRD3</i>   | <i>rs6280</i>          | C                   | 0.997         | 0.004        | 0.985 - 1.008 | 0.877 | 0.380 | 115,249 |
| <b>16</b> | <i>DBH</i>    | <i>rs1611115</i>       | T                   | 0.993         | 0.005        | 0.980 - 1.007 | 1.449 | 0.147 | 113,466 |

*Note:* Linear regression weights for estimated lifetime MDD diagnosis on variant  $\times$  adult trauma controlling for sex, age, age<sup>2</sup>, 10 European ancestry principle components, testing center, batch, variant/moderator main effects, and all variant  $\times$  covariate and moderator  $\times$  covariate effects, on the additive scale.

Table S9.3: Estimated lifetime MDD diagnosis on variant  $\times$  TDI, alternate scale

|           | Gene          | Polymorphism           | Risk/counted allele | $\beta$ | $se_{\beta}$ | Corrected CI   | $ z $ | $p$   | $n$     |
|-----------|---------------|------------------------|---------------------|---------|--------------|----------------|-------|-------|---------|
| <b>1</b>  | <i>SLC6A4</i> | <i>5-HTTLPR</i>        | Low activity        | 0.003   | 0.002        | -0.003 - 0.009 | 1.358 | 0.174 | 115,138 |
| <b>2</b>  | <i>BDNF</i>   | <i>rs6265</i>          | A                   | 0.007   | 0.003        | -0.001 - 0.015 | 2.635 | 0.008 | 115,138 |
| <b>3</b>  | <i>COMT</i>   | <i>rs4680</i>          | G                   | -0.002  | 0.002        | -0.008 - 0.004 | 0.931 | 0.352 | 115,138 |
| <b>4</b>  | <i>HTR2A</i>  | <i>rs6311</i>          | A                   | 0.002   | 0.002        | -0.004 - 0.008 | 0.905 | 0.366 | 115,138 |
| <b>5</b>  | <i>TPH1</i>   | <i>rs1800532</i>       | A                   | -0.001  | 0.002        | -0.008 - 0.005 | 0.703 | 0.482 | 115,138 |
| <b>6</b>  | <i>DRD4</i>   | <i>VNTR</i>            | 7+ repeats          | -0.001  | 0.002        | -0.009 - 0.006 | 0.593 | 0.553 | 115,138 |
| <b>7</b>  | <i>DRD2</i>   | <i>rs1800497</i>       | T                   | -0.001  | 0.003        | -0.008 - 0.007 | 0.393 | 0.694 | 115,138 |
| <b>8</b>  | <i>MAOA</i>   | <i>VNTR</i>            | 2, 3, or 5 repeats  | -0.002  | 0.002        | -0.007 - 0.004 | 0.936 | 0.349 | 115,138 |
| <b>9</b>  | <i>APOE</i>   | <i>rs429358/rs7412</i> | $\epsilon$ -4       | -0.000  | 0.003        | -0.009 - 0.008 | 0.103 | 0.918 | 115,138 |
| <b>10</b> | <i>MTHFR</i>  | <i>rs1801133</i>       | T                   | -0.001  | 0.002        | -0.007 - 0.005 | 0.432 | 0.666 | 115,138 |
| <b>11</b> | <i>CLOCK</i>  | <i>rs1801260</i>       | C                   | 0.004   | 0.002        | -0.003 - 0.011 | 1.698 | 0.090 | 115,138 |
| <b>12</b> | <i>SLC6A3</i> | <i>VNTR</i>            | 10+ repeats         | -0.000  | 0.002        | -0.007 - 0.007 | 0.160 | 0.873 | 115,138 |
| <b>13</b> | <i>ACE</i>    | <i>in/del</i>          | deletion            | -0.001  | 0.002        | -0.007 - 0.005 | 0.459 | 0.646 | 115,138 |
| <b>14</b> | <i>ABCB1</i>  | <i>rs1045642</i>       | C                   | -0.000  | 0.002        | -0.006 - 0.006 | 0.099 | 0.922 | 115,138 |
| <b>15</b> | <i>DRD3</i>   | <i>rs6280</i>          | C                   | 0.001   | 0.002        | -0.005 - 0.007 | 0.394 | 0.694 | 115,138 |
| <b>16</b> | <i>DBH</i>    | <i>rs1611115</i>       | T                   | 0.001   | 0.003        | -0.007 - 0.008 | 0.250 | 0.802 | 113,356 |

*Note:* Linear regression weights for estimated lifetime MDD diagnosis on variant  $\times$  TDI controlling for sex, age, age<sup>2</sup>, 10 European ancestry principle components, testing center, batch, variant/moderator main effects, and all variant  $\times$  covariate and moderator  $\times$  covariate effects, on the additive scale.

Table S9.4: Current MDD severity (MHF) on variant  $\times$  recent trauma, alternate scale

|           | Gene          | Polymorphism           | Risk/counted allele | $\beta$ | $se_{\beta}$ | Corrected CI   | $ z $ | $p$   | $n$     |
|-----------|---------------|------------------------|---------------------|---------|--------------|----------------|-------|-------|---------|
| <b>1</b>  | <i>SLC6A4</i> | <i>5-HTTLPR</i>        | Low activity        | -0.035  | 0.049        | -0.178 - 0.108 | 0.721 | 0.471 | 115,246 |
| <b>2</b>  | <i>BDNF</i>   | <i>rs6265</i>          | A                   | 0.057   | 0.063        | -0.129 - 0.243 | 0.910 | 0.363 | 115,246 |
| <b>3</b>  | <i>COMT</i>   | <i>rs4680</i>          | G                   | -0.087  | 0.049        | -0.232 - 0.058 | 1.774 | 0.076 | 115,246 |
| <b>4</b>  | <i>HTR2A</i>  | <i>rs6311</i>          | A                   | 0.003   | 0.050        | -0.143 - 0.150 | 0.066 | 0.947 | 115,246 |
| <b>5</b>  | <i>TPH1</i>   | <i>rs1800532</i>       | A                   | 0.011   | 0.050        | -0.138 - 0.160 | 0.225 | 0.822 | 115,246 |
| <b>6</b>  | <i>DRD4</i>   | <i>VNTR</i>            | 7+ repeats          | -0.000  | 0.059        | -0.173 - 0.173 | 0.006 | 0.996 | 115,246 |
| <b>7</b>  | <i>DRD2</i>   | <i>rs1800497</i>       | T                   | -0.079  | 0.061        | -0.258 - 0.101 | 1.295 | 0.195 | 115,246 |
| <b>8</b>  | <i>MAOA</i>   | <i>VNTR</i>            | 2, 3, or 5 repeats  | 0.026   | 0.042        | -0.099 - 0.152 | 0.612 | 0.540 | 115,246 |
| <b>9</b>  | <i>APOE</i>   | <i>rs429358/rs7412</i> | $\epsilon$ -4       | -0.182  | 0.069        | -0.388 - 0.023 | 2.628 | 0.009 | 115,246 |
| <b>10</b> | <i>MTHFR</i>  | <i>rs1801133</i>       | T                   | 0.031   | 0.052        | -0.122 - 0.183 | 0.597 | 0.551 | 115,246 |
| <b>11</b> | <i>CLOCK</i>  | <i>rs1801260</i>       | C                   | 0.012   | 0.055        | -0.150 - 0.175 | 0.224 | 0.822 | 115,246 |
| <b>12</b> | <i>SLC6A3</i> | <i>VNTR</i>            | 10+ repeats         | -0.009  | 0.056        | -0.175 - 0.156 | 0.165 | 0.869 | 115,246 |
| <b>13</b> | <i>ACE</i>    | <i>in/del</i>          | deletion            | -0.007  | 0.049        | -0.153 - 0.138 | 0.150 | 0.881 | 115,246 |
| <b>14</b> | <i>ABCB1</i>  | <i>rs1045642</i>       | C                   | 0.108   | 0.049        | -0.037 - 0.254 | 2.209 | 0.027 | 115,246 |
| <b>15</b> | <i>DRD3</i>   | <i>rs6280</i>          | C                   | -0.111  | 0.051        | -0.262 - 0.041 | 2.162 | 0.031 | 115,246 |
| <b>16</b> | <i>DBH</i>    | <i>rs1611115</i>       | T                   | -0.038  | 0.061        | -0.219 - 0.143 | 0.617 | 0.537 | 113,463 |

*Note:* Linear regression weights for current MDD severity (MHF) on variant  $\times$  recent trauma controlling for sex, age, age<sup>2</sup>, 10 European ancestry principle components, testing center, batch, variant/moderator main effects, and all variant  $\times$  covariate and moderator  $\times$  covariate effects, on the additive scale.



Table S9.5: Conditional lifetime symptom count on variant  $\times$  childhood trauma, alternate scale

|           | Gene          | Polymorphism           | Risk/counted allele | $\exp(\beta)$ | $se_{\beta}$ | Corrected CI  | $ z $ | $p$   | $n$    |
|-----------|---------------|------------------------|---------------------|---------------|--------------|---------------|-------|-------|--------|
| <b>1</b>  | <i>SLC6A4</i> | <i>5-HTTLPR</i>        | Low activity        | 0.999         | 0.023        | 0.933 - 1.070 | 0.026 | 0.979 | 62,108 |
| <b>2</b>  | <i>BDNF</i>   | <i>rs6265</i>          | A                   | 1.018         | 0.030        | 0.932 - 1.112 | 0.598 | 0.550 | 62,108 |
| <b>3</b>  | <i>COMT</i>   | <i>rs4680</i>          | G                   | 1.001         | 0.023        | 0.934 - 1.072 | 0.030 | 0.976 | 62,108 |
| <b>4</b>  | <i>HTR2A</i>  | <i>rs6311</i>          | A                   | 1.016         | 0.024        | 0.947 - 1.089 | 0.652 | 0.514 | 62,108 |
| <b>5</b>  | <i>TPH1</i>   | <i>rs1800532</i>       | A                   | 1.048         | 0.024        | 0.976 - 1.124 | 1.947 | 0.052 | 62,108 |
| <b>6</b>  | <i>DRD4</i>   | <i>VNTR</i>            | 7+ repeats          | 1.023         | 0.028        | 0.941 - 1.111 | 0.799 | 0.424 | 62,108 |
| <b>7</b>  | <i>DRD2</i>   | <i>rs1800497</i>       | T                   | 1.006         | 0.029        | 0.923 - 1.096 | 0.212 | 0.832 | 62,108 |
| <b>8</b>  | <i>MAOA</i>   | <i>VNTR</i>            | 2, 3, or 5 repeats  | 0.983         | 0.021        | 0.924 - 1.047 | 0.792 | 0.428 | 62,108 |
| <b>9</b>  | <i>APOE</i>   | <i>rs429358/rs7412</i> | $\epsilon$ -4       | 0.994         | 0.033        | 0.903 - 1.094 | 0.186 | 0.853 | 62,108 |
| <b>10</b> | <i>MTHFR</i>  | <i>rs1801133</i>       | T                   | 0.975         | 0.025        | 0.906 - 1.049 | 1.028 | 0.304 | 62,108 |
| <b>11</b> | <i>CLOCK</i>  | <i>rs1801260</i>       | C                   | 0.996         | 0.026        | 0.922 - 1.076 | 0.142 | 0.887 | 62,108 |
| <b>12</b> | <i>SLC6A3</i> | <i>VNTR</i>            | 10+ repeats         | 0.970         | 0.027        | 0.897 - 1.050 | 1.134 | 0.257 | 62,108 |
| <b>13</b> | <i>ACE</i>    | <i>in/del</i>          | deletion            | 0.998         | 0.023        | 0.932 - 1.069 | 0.067 | 0.947 | 62,108 |
| <b>14</b> | <i>ABCB1</i>  | <i>rs1045642</i>       | C                   | 1.034         | 0.023        | 0.965 - 1.108 | 1.429 | 0.153 | 62,108 |
| <b>15</b> | <i>DRD3</i>   | <i>rs6280</i>          | C                   | 0.957         | 0.025        | 0.890 - 1.030 | 1.768 | 0.077 | 62,108 |
| <b>16</b> | <i>DBH</i>    | <i>rs1611115</i>       | T                   | 1.011         | 0.029        | 0.927 - 1.102 | 0.373 | 0.709 | 61,178 |

*Note:* Ordinal logistic regression weights for conditional lifetime symptom count on variant  $\times$  childhood trauma controlling for sex, age, age<sup>2</sup>, 10 European ancestry principle components, testing center, batch, variant/moderator main effects, and all variant  $\times$  covariate and moderator  $\times$  covariate effects, on the multiplicative scale.

Table S9.6: Conditional lifetime symptom count on variant  $\times$  adult trauma, alternate scale

|           | Gene          | Polymorphism           | Risk/counted allele | $\exp(\beta)$ | $se_{\beta}$ | Corrected CI  | $ z $ | $p$   | $n$    |
|-----------|---------------|------------------------|---------------------|---------------|--------------|---------------|-------|-------|--------|
| <b>1</b>  | <i>SLC6A4</i> | <i>5-HTTLPR</i>        | Low activity        | 1.009         | 0.021        | 0.949 - 1.072 | 0.413 | 0.679 | 62,135 |
| <b>2</b>  | <i>BDNF</i>   | <i>rs6265</i>          | A                   | 1.036         | 0.026        | 0.958 - 1.120 | 1.333 | 0.182 | 62,135 |
| <b>3</b>  | <i>COMT</i>   | <i>rs4680</i>          | G                   | 0.971         | 0.021        | 0.914 - 1.032 | 1.410 | 0.159 | 62,135 |
| <b>4</b>  | <i>HTR2A</i>  | <i>rs6311</i>          | A                   | 0.998         | 0.021        | 0.938 - 1.062 | 0.081 | 0.935 | 62,135 |
| <b>5</b>  | <i>TPH1</i>   | <i>rs1800532</i>       | A                   | 1.013         | 0.021        | 0.952 - 1.079 | 0.627 | 0.531 | 62,135 |
| <b>6</b>  | <i>DRD4</i>   | <i>VNTR</i>            | 7+ repeats          | 0.980         | 0.025        | 0.910 - 1.055 | 0.818 | 0.413 | 62,135 |
| <b>7</b>  | <i>DRD2</i>   | <i>rs1800497</i>       | T                   | 1.008         | 0.026        | 0.934 - 1.088 | 0.308 | 0.758 | 62,135 |
| <b>8</b>  | <i>MAOA</i>   | <i>VNTR</i>            | 2, 3, or 5 repeats  | 0.981         | 0.019        | 0.928 - 1.037 | 1.010 | 0.313 | 62,135 |
| <b>9</b>  | <i>APOE</i>   | <i>rs429358/rs7412</i> | $\epsilon$ -4       | 0.981         | 0.029        | 0.900 - 1.069 | 0.658 | 0.511 | 62,135 |
| <b>10</b> | <i>MTHFR</i>  | <i>rs1801133</i>       | T                   | 1.011         | 0.022        | 0.947 - 1.078 | 0.482 | 0.630 | 62,135 |
| <b>11</b> | <i>CLOCK</i>  | <i>rs1801260</i>       | C                   | 1.038         | 0.023        | 0.969 - 1.112 | 1.591 | 0.112 | 62,135 |
| <b>12</b> | <i>SLC6A3</i> | <i>VNTR</i>            | 10+ repeats         | 0.968         | 0.024        | 0.903 - 1.039 | 1.350 | 0.177 | 62,135 |
| <b>13</b> | <i>ACE</i>    | <i>in/del</i>          | deletion            | 1.030         | 0.021        | 0.969 - 1.095 | 1.419 | 0.156 | 62,135 |
| <b>14</b> | <i>ABCB1</i>  | <i>rs1045642</i>       | C                   | 0.998         | 0.021        | 0.939 - 1.061 | 0.082 | 0.935 | 62,135 |
| <b>15</b> | <i>DRD3</i>   | <i>rs6280</i>          | C                   | 0.982         | 0.022        | 0.921 - 1.048 | 0.813 | 0.416 | 62,135 |
| <b>16</b> | <i>DBH</i>    | <i>rs1611115</i>       | T                   | 0.967         | 0.026        | 0.895 - 1.044 | 1.305 | 0.192 | 61,205 |

*Note:* Ordinal logistic regression weights for conditional lifetime symptom count on variant  $\times$  adult trauma controlling for sex, age, age<sup>2</sup>, 10 European ancestry principle components, testing center, batch, variant/moderator main effects, and all variant  $\times$  covariate and moderator  $\times$  covariate effects, on the multiplicative scale.

Table S9.7: Conditional lifetime symptom count on variant  $\times$  TDI, alternate scale

|           | Gene          | Polymorphism           | Risk/counted allele | $\exp(\beta)$ | $se_{\beta}$ | Corrected CI  | $ z $ | $p$   | $n$    |
|-----------|---------------|------------------------|---------------------|---------------|--------------|---------------|-------|-------|--------|
| <b>1</b>  | <i>SLC6A4</i> | <i>5-HTTLPR</i>        | Low activity        | 1.013         | 0.011        | 0.980 - 1.046 | 1.182 | 0.237 | 62,069 |
| <b>2</b>  | <i>BDNF</i>   | <i>rs6265</i>          | A                   | 1.011         | 0.014        | 0.969 - 1.053 | 0.789 | 0.430 | 62,069 |
| <b>3</b>  | <i>COMT</i>   | <i>rs4680</i>          | G                   | 1.004         | 0.011        | 0.971 - 1.036 | 0.334 | 0.738 | 62,069 |
| <b>4</b>  | <i>HTR2A</i>  | <i>rs6311</i>          | A                   | 1.000         | 0.011        | 0.967 - 1.034 | 0.039 | 0.969 | 62,069 |
| <b>5</b>  | <i>TPH1</i>   | <i>rs1800532</i>       | A                   | 1.008         | 0.011        | 0.974 - 1.042 | 0.691 | 0.489 | 62,069 |
| <b>6</b>  | <i>DRD4</i>   | <i>VNTR</i>            | 7+ repeats          | 1.001         | 0.013        | 0.961 - 1.040 | 0.059 | 0.953 | 62,069 |
| <b>7</b>  | <i>DRD2</i>   | <i>rs1800497</i>       | T                   | 1.021         | 0.014        | 0.980 - 1.061 | 1.479 | 0.139 | 62,069 |
| <b>8</b>  | <i>MAOA</i>   | <i>VNTR</i>            | 2, 3, or 5 repeats  | 1.021         | 0.010        | 0.991 - 1.050 | 2.060 | 0.039 | 62,069 |
| <b>9</b>  | <i>APOE</i>   | <i>rs429358/rs7412</i> | $\epsilon$ -4       | 1.002         | 0.016        | 0.956 - 1.047 | 0.098 | 0.922 | 62,069 |
| <b>10</b> | <i>MTHFR</i>  | <i>rs1801133</i>       | T                   | 1.004         | 0.012        | 0.969 - 1.039 | 0.349 | 0.727 | 62,069 |
| <b>11</b> | <i>CLOCK</i>  | <i>rs1801260</i>       | C                   | 1.018         | 0.013        | 0.981 - 1.055 | 1.453 | 0.146 | 62,069 |
| <b>12</b> | <i>SLC6A3</i> | <i>VNTR</i>            | 10+ repeats         | 1.005         | 0.013        | 0.967 - 1.043 | 0.391 | 0.696 | 62,069 |
| <b>13</b> | <i>ACE</i>    | <i>in/del</i>          | deletion            | 1.011         | 0.011        | 0.979 - 1.044 | 1.029 | 0.303 | 62,069 |
| <b>14</b> | <i>ABCB1</i>  | <i>rs1045642</i>       | C                   | 1.003         | 0.011        | 0.970 - 1.036 | 0.247 | 0.805 | 62,069 |
| <b>15</b> | <i>DRD3</i>   | <i>rs6280</i>          | C                   | 1.007         | 0.012        | 0.973 - 1.042 | 0.615 | 0.539 | 62,069 |
| <b>16</b> | <i>DBH</i>    | <i>rs1611115</i>       | T                   | 1.006         | 0.014        | 0.966 - 1.047 | 0.462 | 0.644 | 61,139 |

*Note:* Ordinal logistic regression weights for conditional lifetime symptom count on variant  $\times$  TDI controlling for sex, age, age<sup>2</sup>, 10 European ancestry principle components, testing center, batch, variant/moderator main effects, and all variant  $\times$  covariate and moderator  $\times$  covariate effects, on the multiplicative scale.

Table S9.8: Conditional lifetime symptom count on variant  $\times$  stressor-induced depression, alternate scale

|           | Gene          | Polymorphism           | Risk/counted allele | $\exp(\beta)$ | $se_{\beta}$ | Corrected CI  | $ z $ | $p$   | $n$    |
|-----------|---------------|------------------------|---------------------|---------------|--------------|---------------|-------|-------|--------|
| <b>1</b>  | <i>SLC6A4</i> | <i>5-HTTLPR</i>        | Low activity        | 0.971         | 0.023        | 0.906 - 1.040 | 1.267 | 0.205 | 61,888 |
| <b>2</b>  | <i>BDNF</i>   | <i>rs6265</i>          | A                   | 1.011         | 0.030        | 0.925 - 1.105 | 0.360 | 0.719 | 61,888 |
| <b>3</b>  | <i>COMT</i>   | <i>rs4680</i>          | G                   | 1.049         | 0.023        | 0.979 - 1.124 | 2.052 | 0.040 | 61,888 |
| <b>4</b>  | <i>HTR2A</i>  | <i>rs6311</i>          | A                   | 1.028         | 0.024        | 0.959 - 1.103 | 1.176 | 0.240 | 61,888 |
| <b>5</b>  | <i>TPH1</i>   | <i>rs1800532</i>       | A                   | 1.009         | 0.024        | 0.940 - 1.083 | 0.387 | 0.699 | 61,888 |
| <b>6</b>  | <i>DRD4</i>   | <i>VNTR</i>            | 7+ repeats          | 1.031         | 0.028        | 0.949 - 1.121 | 1.093 | 0.274 | 61,888 |
| <b>7</b>  | <i>DRD2</i>   | <i>rs1800497</i>       | T                   | 1.045         | 0.029        | 0.958 - 1.140 | 1.497 | 0.134 | 61,888 |
| <b>8</b>  | <i>MAOA</i>   | <i>VNTR</i>            | 2, 3, or 5 repeats  | 0.990         | 0.021        | 0.931 - 1.052 | 0.509 | 0.611 | 61,888 |
| <b>9</b>  | <i>APOE</i>   | <i>rs429358/rs7412</i> | $\epsilon$ -4       | 1.019         | 0.033        | 0.925 - 1.122 | 0.564 | 0.573 | 61,888 |
| <b>10</b> | <i>MTHFR</i>  | <i>rs1801133</i>       | T                   | 0.972         | 0.025        | 0.904 - 1.046 | 1.132 | 0.258 | 61,888 |
| <b>11</b> | <i>CLOCK</i>  | <i>rs1801260</i>       | C                   | 1.031         | 0.026        | 0.953 - 1.114 | 1.146 | 0.252 | 61,888 |
| <b>12</b> | <i>SLC6A3</i> | <i>VNTR</i>            | 10+ repeats         | 1.008         | 0.027        | 0.931 - 1.092 | 0.307 | 0.759 | 61,888 |
| <b>13</b> | <i>ACE</i>    | <i>in/del</i>          | deletion            | 1.011         | 0.023        | 0.944 - 1.084 | 0.487 | 0.626 | 61,888 |
| <b>14</b> | <i>ABCB1</i>  | <i>rs1045642</i>       | C                   | 1.019         | 0.023        | 0.951 - 1.092 | 0.792 | 0.428 | 61,888 |
| <b>15</b> | <i>DRD3</i>   | <i>rs6280</i>          | C                   | 0.955         | 0.025        | 0.888 - 1.027 | 1.871 | 0.061 | 61,888 |
| <b>16</b> | <i>DBH</i>    | <i>rs1611115</i>       | T                   | 1.028         | 0.029        | 0.943 - 1.121 | 0.943 | 0.345 | 60,960 |

*Note:* Ordinal logistic regression weights for conditional lifetime symptom count on variant  $\times$  stressor-induced depression controlling for sex, age, age<sup>2</sup>, 10 European ancestry principle components, testing center, batch, variant/moderator main effects, and all variant  $\times$  covariate and moderator  $\times$  covariate effects, on the multiplicative scale.

Table S9.9: Lifetime episode count on variant  $\times$  childhood trauma, alternate scale

|           | Gene          | Polymorphism           | Risk/counted allele | $\exp(\beta)$ | $se_{\beta}$ | Corrected CI  | $ z $ | $p$   | $n$     |
|-----------|---------------|------------------------|---------------------|---------------|--------------|---------------|-------|-------|---------|
| <b>1</b>  | <i>SLC6A4</i> | <i>5-HTTLPR</i>        | Low activity        | 1.001         | 0.008        | 0.977 - 1.025 | 0.071 | 0.943 | 112,216 |
| <b>2</b>  | <i>BDNF</i>   | <i>rs6265</i>          | A                   | 1.006         | 0.010        | 0.976 - 1.038 | 0.621 | 0.534 | 112,216 |
| <b>3</b>  | <i>COMT</i>   | <i>rs4680</i>          | G                   | 0.995         | 0.008        | 0.971 - 1.019 | 0.673 | 0.501 | 112,216 |
| <b>4</b>  | <i>HTR2A</i>  | <i>rs6311</i>          | A                   | 0.990         | 0.008        | 0.966 - 1.014 | 1.240 | 0.215 | 112,216 |
| <b>5</b>  | <i>TPH1</i>   | <i>rs1800532</i>       | A                   | 0.999         | 0.008        | 0.974 - 1.023 | 0.161 | 0.872 | 112,216 |
| <b>6</b>  | <i>DRD4</i>   | <i>VNTR</i>            | 7+ repeats          | 1.001         | 0.010        | 0.973 - 1.030 | 0.096 | 0.924 | 112,216 |
| <b>7</b>  | <i>DRD2</i>   | <i>rs1800497</i>       | T                   | 1.001         | 0.010        | 0.972 - 1.031 | 0.111 | 0.912 | 112,216 |
| <b>8</b>  | <i>MAOA</i>   | <i>VNTR</i>            | 2, 3, or 5 repeats  | 0.995         | 0.007        | 0.974 - 1.016 | 0.762 | 0.446 | 112,216 |
| <b>9</b>  | <i>APOE</i>   | <i>rs429358/rs7412</i> | $\epsilon$ -4       | 1.008         | 0.011        | 0.975 - 1.043 | 0.717 | 0.473 | 112,216 |
| <b>10</b> | <i>MTHFR</i>  | <i>rs1801133</i>       | T                   | 0.987         | 0.009        | 0.962 - 1.012 | 1.551 | 0.121 | 112,216 |
| <b>11</b> | <i>CLOCK</i>  | <i>rs1801260</i>       | C                   | 1.000         | 0.009        | 0.974 - 1.027 | 0.028 | 0.977 | 112,216 |
| <b>12</b> | <i>SLC6A3</i> | <i>VNTR</i>            | 10+ repeats         | 0.990         | 0.009        | 0.963 - 1.017 | 1.114 | 0.265 | 112,216 |
| <b>13</b> | <i>ACE</i>    | <i>in/del</i>          | deletion            | 0.997         | 0.008        | 0.973 - 1.021 | 0.420 | 0.675 | 112,216 |
| <b>14</b> | <i>ABCB1</i>  | <i>rs1045642</i>       | C                   | 0.990         | 0.008        | 0.967 - 1.014 | 1.187 | 0.235 | 112,216 |
| <b>15</b> | <i>DRD3</i>   | <i>rs6280</i>          | C                   | 0.997         | 0.009        | 0.972 - 1.022 | 0.373 | 0.709 | 112,216 |
| <b>16</b> | <i>DBH</i>    | <i>rs1611115</i>       | T                   | 0.986         | 0.010        | 0.957 - 1.016 | 1.433 | 0.152 | 110,469 |

*Note:* Linear regression weights for lifetime episode count on variant  $\times$  childhood trauma controlling for sex, age, age<sup>2</sup>, 10 European ancestry principle components, testing center, batch, variant/moderator main effects, and all variant  $\times$  covariate and moderator  $\times$  covariate effects, on the additive scale.

Table S9.10: Lifetime episode count on variant  $\times$  adult trauma, alternate scale

|           | Gene          | Polymorphism           | Risk/counted allele | $\exp(\beta)$ | $se_{\beta}$ | Corrected CI  | $ z $ | $p$   | $n$     |
|-----------|---------------|------------------------|---------------------|---------------|--------------|---------------|-------|-------|---------|
| <b>1</b>  | <i>SLC6A4</i> | <i>5-HTTLPR</i>        | Low activity        | 1.003         | 0.007        | 0.983 - 1.023 | 0.469 | 0.639 | 112,255 |
| <b>2</b>  | <i>BDNF</i>   | <i>rs6265</i>          | A                   | 0.994         | 0.009        | 0.969 - 1.020 | 0.683 | 0.495 | 112,255 |
| <b>3</b>  | <i>COMT</i>   | <i>rs4680</i>          | G                   | 1.000         | 0.007        | 0.980 - 1.020 | 0.011 | 0.992 | 112,255 |
| <b>4</b>  | <i>HTR2A</i>  | <i>rs6311</i>          | A                   | 1.000         | 0.007        | 0.980 - 1.021 | 0.003 | 0.997 | 112,255 |
| <b>5</b>  | <i>TPH1</i>   | <i>rs1800532</i>       | A                   | 1.005         | 0.007        | 0.985 - 1.026 | 0.724 | 0.469 | 112,255 |
| <b>6</b>  | <i>DRD4</i>   | <i>VNTR</i>            | 7+ repeats          | 1.002         | 0.008        | 0.978 - 1.026 | 0.192 | 0.847 | 112,255 |
| <b>7</b>  | <i>DRD2</i>   | <i>rs1800497</i>       | T                   | 1.005         | 0.008        | 0.980 - 1.030 | 0.603 | 0.547 | 112,255 |
| <b>8</b>  | <i>MAOA</i>   | <i>VNTR</i>            | 2, 3, or 5 repeats  | 1.003         | 0.006        | 0.985 - 1.020 | 0.433 | 0.665 | 112,255 |
| <b>9</b>  | <i>APOE</i>   | <i>rs429358/rs7412</i> | $\epsilon$ -4       | 0.999         | 0.009        | 0.972 - 1.028 | 0.080 | 0.936 | 112,255 |
| <b>10</b> | <i>MTHFR</i>  | <i>rs1801133</i>       | T                   | 1.014         | 0.007        | 0.992 - 1.035 | 1.888 | 0.059 | 112,255 |
| <b>11</b> | <i>CLOCK</i>  | <i>rs1801260</i>       | C                   | 1.000         | 0.008        | 0.977 - 1.022 | 0.050 | 0.960 | 112,255 |
| <b>12</b> | <i>SLC6A3</i> | <i>VNTR</i>            | 10+ repeats         | 1.001         | 0.008        | 0.978 - 1.024 | 0.117 | 0.907 | 112,255 |
| <b>13</b> | <i>ACE</i>    | <i>in/del</i>          | deletion            | 1.001         | 0.007        | 0.981 - 1.021 | 0.164 | 0.870 | 112,255 |
| <b>14</b> | <i>ABCB1</i>  | <i>rs1045642</i>       | C                   | 1.000         | 0.007        | 0.981 - 1.021 | 0.067 | 0.947 | 112,255 |
| <b>15</b> | <i>DRD3</i>   | <i>rs6280</i>          | C                   | 0.989         | 0.007        | 0.969 - 1.011 | 1.488 | 0.137 | 112,255 |
| <b>16</b> | <i>DBH</i>    | <i>rs1611115</i>       | T                   | 0.995         | 0.008        | 0.971 - 1.020 | 0.580 | 0.562 | 110,507 |

*Note:* Linear regression weights for lifetime episode count on variant  $\times$  adult trauma controlling for sex, age, age<sup>2</sup>, 10 European ancestry principle components, testing center, batch, variant/moderator main effects, and all variant  $\times$  covariate and moderator  $\times$  covariate effects, on the additive scale.

Table S9.11: Lifetime episode count on variant  $\times$  TDI, alternate scale

|           | Gene          | Polymorphism           | Risk/counted allele | $\beta$ | $se_{\beta}$ | Corrected CI   | $ z $ | $p$   | $n$     |
|-----------|---------------|------------------------|---------------------|---------|--------------|----------------|-------|-------|---------|
| <b>1</b>  | <i>SLC6A4</i> | <i>5-HTTLPR</i>        | Low activity        | 0.007   | 0.004        | -0.004 - 0.019 | 1.934 | 0.053 | 112,144 |
| <b>2</b>  | <i>BDNF</i>   | <i>rs6265</i>          | A                   | 0.009   | 0.005        | -0.005 - 0.023 | 1.857 | 0.063 | 112,144 |
| <b>3</b>  | <i>COMT</i>   | <i>rs4680</i>          | G                   | 0.005   | 0.004        | -0.006 - 0.016 | 1.357 | 0.175 | 112,144 |
| <b>4</b>  | <i>HTR2A</i>  | <i>rs6311</i>          | A                   | 0.003   | 0.004        | -0.009 - 0.014 | 0.724 | 0.469 | 112,144 |
| <b>5</b>  | <i>TPH1</i>   | <i>rs1800532</i>       | A                   | 0.001   | 0.004        | -0.010 - 0.013 | 0.315 | 0.753 | 112,144 |
| <b>6</b>  | <i>DRD4</i>   | <i>VNTR</i>            | 7+ repeats          | -0.002  | 0.005        | -0.016 - 0.011 | 0.542 | 0.588 | 112,144 |
| <b>7</b>  | <i>DRD2</i>   | <i>rs1800497</i>       | T                   | -0.004  | 0.005        | -0.018 - 0.010 | 0.817 | 0.414 | 112,144 |
| <b>8</b>  | <i>MAOA</i>   | <i>VNTR</i>            | 2, 3, or 5 repeats  | -0.001  | 0.003        | -0.011 - 0.009 | 0.285 | 0.776 | 112,144 |
| <b>9</b>  | <i>APOE</i>   | <i>rs429358/rs7412</i> | $\epsilon$ -4       | -0.003  | 0.005        | -0.018 - 0.013 | 0.479 | 0.632 | 112,144 |
| <b>10</b> | <i>MTHFR</i>  | <i>rs1801133</i>       | T                   | -0.001  | 0.004        | -0.013 - 0.011 | 0.189 | 0.850 | 112,144 |
| <b>11</b> | <i>CLOCK</i>  | <i>rs1801260</i>       | C                   | 0.010   | 0.004        | -0.003 - 0.023 | 2.297 | 0.022 | 112,144 |
| <b>12</b> | <i>SLC6A3</i> | <i>VNTR</i>            | 10+ repeats         | 0.002   | 0.004        | -0.010 - 0.015 | 0.576 | 0.565 | 112,144 |
| <b>13</b> | <i>ACE</i>    | <i>in/del</i>          | deletion            | 0.006   | 0.004        | -0.005 - 0.017 | 1.612 | 0.107 | 112,144 |
| <b>14</b> | <i>ABCB1</i>  | <i>rs1045642</i>       | C                   | -0.007  | 0.004        | -0.018 - 0.004 | 1.808 | 0.071 | 112,144 |
| <b>15</b> | <i>DRD3</i>   | <i>rs6280</i>          | C                   | 0.001   | 0.004        | -0.011 - 0.012 | 0.140 | 0.889 | 112,144 |
| <b>16</b> | <i>DBH</i>    | <i>rs1611115</i>       | T                   | 0.007   | 0.005        | -0.007 - 0.021 | 1.418 | 0.156 | 110,397 |

*Note:* Linear regression weights for lifetime episode count on variant  $\times$  TDI controlling for sex, age, age<sup>2</sup>, 10 European ancestry principle components, testing center, batch, variant/moderator main effects, and all variant  $\times$  covariate and moderator  $\times$  covariate effects, on the additive scale.

Table S9.12: Touchscreen probable lifetime diagnosis on variant  $\times$  TDI, alternate scale

|           | Gene          | Polymorphism           | Risk/counted allele | $\beta$ | $se_{\beta}$ | Corrected CI   | $ z $ | $p$   | $n$    |
|-----------|---------------|------------------------|---------------------|---------|--------------|----------------|-------|-------|--------|
| <b>1</b>  | <i>SLC6A4</i> | <i>5-HTTLPR</i>        | Low activity        | 0.001   | 0.002        | -0.005 - 0.008 | 0.556 | 0.578 | 90,812 |
| <b>2</b>  | <i>BDNF</i>   | <i>rs6265</i>          | A                   | -0.003  | 0.003        | -0.011 - 0.006 | 0.967 | 0.334 | 90,812 |
| <b>3</b>  | <i>COMT</i>   | <i>rs4680</i>          | G                   | -0.002  | 0.002        | -0.009 - 0.005 | 0.975 | 0.329 | 90,812 |
| <b>4</b>  | <i>HTR2A</i>  | <i>rs6311</i>          | A                   | 0.000   | 0.002        | -0.007 - 0.007 | 0.128 | 0.898 | 90,812 |
| <b>5</b>  | <i>TPH1</i>   | <i>rs1800532</i>       | A                   | -0.003  | 0.002        | -0.010 - 0.004 | 1.357 | 0.175 | 90,812 |
| <b>6</b>  | <i>DRD4</i>   | <i>VNTR</i>            | 7+ repeats          | 0.001   | 0.003        | -0.007 - 0.009 | 0.286 | 0.775 | 90,812 |
| <b>7</b>  | <i>DRD2</i>   | <i>rs1800497</i>       | T                   | -0.003  | 0.003        | -0.011 - 0.005 | 1.064 | 0.287 | 90,812 |
| <b>8</b>  | <i>MAOA</i>   | <i>VNTR</i>            | 2, 3, or 5 repeats  | -0.001  | 0.002        | -0.006 - 0.005 | 0.318 | 0.750 | 90,812 |
| <b>9</b>  | <i>APOE</i>   | <i>rs429358/rs7412</i> | $\epsilon$ -4       | 0.004   | 0.003        | -0.005 - 0.013 | 1.292 | 0.196 | 90,812 |
| <b>10</b> | <i>MTHFR</i>  | <i>rs1801133</i>       | T                   | -0.002  | 0.002        | -0.009 - 0.005 | 0.826 | 0.409 | 90,812 |
| <b>11</b> | <i>CLOCK</i>  | <i>rs1801260</i>       | C                   | -0.002  | 0.003        | -0.010 - 0.005 | 0.853 | 0.394 | 90,812 |
| <b>12</b> | <i>SLC6A3</i> | <i>VNTR</i>            | 10+ repeats         | 0.004   | 0.003        | -0.004 - 0.012 | 1.462 | 0.144 | 90,812 |
| <b>13</b> | <i>ACE</i>    | <i>in/del</i>          | deletion            | -0.000  | 0.002        | -0.007 - 0.007 | 0.094 | 0.925 | 90,812 |
| <b>14</b> | <i>ABCB1</i>  | <i>rs1045642</i>       | C                   | 0.003   | 0.002        | -0.004 - 0.010 | 1.236 | 0.216 | 90,812 |
| <b>15</b> | <i>DRD3</i>   | <i>rs6280</i>          | C                   | 0.003   | 0.002        | -0.004 - 0.010 | 1.276 | 0.202 | 90,812 |
| <b>16</b> | <i>DBH</i>    | <i>rs1611115</i>       | T                   | 0.002   | 0.003        | -0.006 - 0.010 | 0.740 | 0.460 | 89,397 |

*Note:* Linear regression weights for touchscreen probable lifetime diagnosis on variant  $\times$  TDI controlling for sex, age, age<sup>2</sup>, 10 European ancestry principle components, testing center, batch, variant/moderator main effects, and all variant  $\times$  covariate and moderator  $\times$  covariate effects, on the additive scale.

Table S9.13: Touchscreen probable lifetime diagnosis, ordinal classification on variant  $\times$  TDI, alternate scale

|           | Gene          | Polymorphism           | Risk/counted allele | $\beta$ | $se_{\beta}$ | Corrected CI   | $ z $ | $p$   | $n$    |
|-----------|---------------|------------------------|---------------------|---------|--------------|----------------|-------|-------|--------|
| <b>1</b>  | <i>SLC6A4</i> | <i>5-HTTLPR</i>        | Low activity        | 0.004   | 0.005        | -0.011 - 0.018 | 0.705 | 0.481 | 90,812 |
| <b>2</b>  | <i>BDNF</i>   | <i>rs6265</i>          | A                   | -0.009  | 0.006        | -0.028 - 0.010 | 1.449 | 0.147 | 90,812 |
| <b>3</b>  | <i>COMT</i>   | <i>rs4680</i>          | G                   | -0.001  | 0.005        | -0.016 - 0.014 | 0.226 | 0.821 | 90,812 |
| <b>4</b>  | <i>HTR2A</i>  | <i>rs6311</i>          | A                   | 0.001   | 0.005        | -0.014 - 0.016 | 0.259 | 0.796 | 90,812 |
| <b>5</b>  | <i>TPH1</i>   | <i>rs1800532</i>       | A                   | -0.007  | 0.005        | -0.022 - 0.008 | 1.402 | 0.161 | 90,812 |
| <b>6</b>  | <i>DRD4</i>   | <i>VNTR</i>            | 7+ repeats          | -0.001  | 0.006        | -0.018 - 0.017 | 0.087 | 0.931 | 90,812 |
| <b>7</b>  | <i>DRD2</i>   | <i>rs1800497</i>       | T                   | 0.001   | 0.006        | -0.018 - 0.019 | 0.140 | 0.889 | 90,812 |
| <b>8</b>  | <i>MAOA</i>   | <i>VNTR</i>            | 2, 3, or 5 repeats  | -0.003  | 0.004        | -0.016 - 0.010 | 0.717 | 0.473 | 90,812 |
| <b>9</b>  | <i>APOE</i>   | <i>rs429358/rs7412</i> | $\epsilon$ -4       | 0.012   | 0.007        | -0.009 - 0.032 | 1.695 | 0.090 | 90,812 |
| <b>10</b> | <i>MTHFR</i>  | <i>rs1801133</i>       | T                   | -0.002  | 0.005        | -0.018 - 0.013 | 0.472 | 0.637 | 90,812 |
| <b>11</b> | <i>CLOCK</i>  | <i>rs1801260</i>       | C                   | 0.001   | 0.006        | -0.016 - 0.018 | 0.152 | 0.879 | 90,812 |
| <b>12</b> | <i>SLC6A3</i> | <i>VNTR</i>            | 10+ repeats         | 0.007   | 0.006        | -0.010 - 0.023 | 1.151 | 0.250 | 90,812 |
| <b>13</b> | <i>ACE</i>    | <i>in/del</i>          | deletion            | 0.002   | 0.005        | -0.013 - 0.016 | 0.328 | 0.743 | 90,812 |
| <b>14</b> | <i>ABCB1</i>  | <i>rs1045642</i>       | C                   | 0.005   | 0.005        | -0.010 - 0.020 | 0.986 | 0.324 | 90,812 |
| <b>15</b> | <i>DRD3</i>   | <i>rs6280</i>          | C                   | 0.004   | 0.005        | -0.011 - 0.020 | 0.809 | 0.418 | 90,812 |
| <b>16</b> | <i>DBH</i>    | <i>rs1611115</i>       | T                   | 0.005   | 0.006        | -0.013 - 0.024 | 0.867 | 0.386 | 89,397 |

*Note:* Linear regression weights for touchscreen probable lifetime diagnosis, ordinal classification on variant  $\times$  TDI controlling for sex, age, age<sup>2</sup>, 10 European ancestry principle components, testing center, batch, variant/moderator main effects, and all variant  $\times$  covariate and moderator  $\times$  covariate effects, on the additive scale.

Table S9.14: Severe recurrent MDD (MHF) on variant  $\times$  childhood trauma, alternate scale

|           | Gene          | Polymorphism           | Risk/counted allele | $\beta$ | $se_{\beta}$ | Corrected CI   | $ z $ | $p$   | $n$    |
|-----------|---------------|------------------------|---------------------|---------|--------------|----------------|-------|-------|--------|
| <b>1</b>  | <i>SLC6A4</i> | <i>5-HTTLPR</i>        | Low activity        | 0.001   | 0.002        | -0.005 - 0.008 | 0.626 | 0.532 | 67,304 |
| <b>2</b>  | <i>BDNF</i>   | <i>rs6265</i>          | A                   | 0.003   | 0.003        | -0.006 - 0.012 | 1.002 | 0.316 | 67,304 |
| <b>3</b>  | <i>COMT</i>   | <i>rs4680</i>          | G                   | 0.002   | 0.002        | -0.005 - 0.008 | 0.695 | 0.487 | 67,304 |
| <b>4</b>  | <i>HTR2A</i>  | <i>rs6311</i>          | A                   | 0.004   | 0.002        | -0.003 - 0.011 | 1.610 | 0.107 | 67,304 |
| <b>5</b>  | <i>TPH1</i>   | <i>rs1800532</i>       | A                   | -0.001  | 0.002        | -0.008 - 0.005 | 0.596 | 0.551 | 67,304 |
| <b>6</b>  | <i>DRD4</i>   | <i>VNTR</i>            | 7+ repeats          | -0.000  | 0.003        | -0.008 - 0.008 | 0.001 | 0.999 | 67,304 |
| <b>7</b>  | <i>DRD2</i>   | <i>rs1800497</i>       | T                   | -0.001  | 0.003        | -0.010 - 0.007 | 0.466 | 0.642 | 67,304 |
| <b>8</b>  | <i>MAOA</i>   | <i>VNTR</i>            | 2, 3, or 5 repeats  | -0.001  | 0.002        | -0.007 - 0.005 | 0.351 | 0.726 | 67,304 |
| <b>9</b>  | <i>APOE</i>   | <i>rs429358/rs7412</i> | $\epsilon$ -4       | 0.001   | 0.003        | -0.009 - 0.010 | 0.172 | 0.863 | 67,304 |
| <b>10</b> | <i>MTHFR</i>  | <i>rs1801133</i>       | T                   | 0.005   | 0.002        | -0.003 - 0.012 | 1.880 | 0.060 | 67,304 |
| <b>11</b> | <i>CLOCK</i>  | <i>rs1801260</i>       | C                   | -0.001  | 0.003        | -0.008 - 0.007 | 0.269 | 0.788 | 67,304 |
| <b>12</b> | <i>SLC6A3</i> | <i>VNTR</i>            | 10+ repeats         | -0.004  | 0.003        | -0.012 - 0.004 | 1.529 | 0.126 | 67,304 |
| <b>13</b> | <i>ACE</i>    | <i>in/del</i>          | deletion            | 0.002   | 0.002        | -0.005 - 0.009 | 0.882 | 0.378 | 67,304 |
| <b>14</b> | <i>ABCB1</i>  | <i>rs1045642</i>       | C                   | 0.001   | 0.002        | -0.006 - 0.008 | 0.522 | 0.602 | 67,304 |
| <b>15</b> | <i>DRD3</i>   | <i>rs6280</i>          | C                   | -0.002  | 0.002        | -0.009 - 0.006 | 0.631 | 0.528 | 67,304 |
| <b>16</b> | <i>DBH</i>    | <i>rs1611115</i>       | T                   | -0.005  | 0.003        | -0.013 - 0.004 | 1.712 | 0.087 | 66,231 |

*Note:* Logistic regression weights for Severe recurrent MDD (MHF) on variant  $\times$  childhood trauma controlling for sex, age, age<sup>2</sup>, 10 European ancestry principle components, testing center, batch, variant/moderator main effects, and all variant  $\times$  covariate and moderator  $\times$  covariate effects, on the additive scale.

Table S9.15: Severe recurrent MDD (MHF) on variant  $\times$  childhood trauma, alternate scale

|    | Gene          | Polymorphism           | Risk/counted allele | $\beta$ | $se_{\beta}$ | Corrected CI   | $ z $ | $p$   | $n$    |
|----|---------------|------------------------|---------------------|---------|--------------|----------------|-------|-------|--------|
| 1  | <i>SLC6A4</i> | <i>5-HTTLPR</i>        | Low activity        | 0.001   | 0.002        | -0.005 - 0.008 | 0.626 | 0.532 | 67,304 |
| 2  | <i>BDNF</i>   | <i>rs6265</i>          | A                   | 0.003   | 0.003        | -0.006 - 0.012 | 1.002 | 0.316 | 67,304 |
| 3  | <i>COMT</i>   | <i>rs4680</i>          | G                   | 0.002   | 0.002        | -0.005 - 0.008 | 0.695 | 0.487 | 67,304 |
| 4  | <i>HTR2A</i>  | <i>rs6311</i>          | A                   | 0.004   | 0.002        | -0.003 - 0.011 | 1.610 | 0.107 | 67,304 |
| 5  | <i>TPH1</i>   | <i>rs1800532</i>       | A                   | -0.001  | 0.002        | -0.008 - 0.005 | 0.596 | 0.551 | 67,304 |
| 6  | <i>DRD4</i>   | <i>VNTR</i>            | 7+ repeats          | -0.000  | 0.003        | -0.008 - 0.008 | 0.001 | 0.999 | 67,304 |
| 7  | <i>DRD2</i>   | <i>rs1800497</i>       | T                   | -0.001  | 0.003        | -0.010 - 0.007 | 0.466 | 0.642 | 67,304 |
| 8  | <i>MAOA</i>   | <i>VNTR</i>            | 2, 3, or 5 repeats  | -0.001  | 0.002        | -0.007 - 0.005 | 0.351 | 0.726 | 67,304 |
| 9  | <i>APOE</i>   | <i>rs429358/rs7412</i> | $\epsilon$ -4       | 0.001   | 0.003        | -0.009 - 0.010 | 0.172 | 0.863 | 67,304 |
| 10 | <i>MTHFR</i>  | <i>rs1801133</i>       | T                   | 0.005   | 0.002        | -0.003 - 0.012 | 1.880 | 0.060 | 67,304 |
| 11 | <i>CLOCK</i>  | <i>rs1801260</i>       | C                   | -0.001  | 0.003        | -0.008 - 0.007 | 0.269 | 0.788 | 67,304 |
| 12 | <i>SLC6A3</i> | <i>VNTR</i>            | 10+ repeats         | -0.004  | 0.003        | -0.012 - 0.004 | 1.529 | 0.126 | 67,304 |
| 13 | <i>ACE</i>    | <i>in/del</i>          | deletion            | 0.002   | 0.002        | -0.005 - 0.009 | 0.882 | 0.378 | 67,304 |
| 14 | <i>ABCB1</i>  | <i>rs1045642</i>       | C                   | 0.001   | 0.002        | -0.006 - 0.008 | 0.522 | 0.602 | 67,304 |
| 15 | <i>DRD3</i>   | <i>rs6280</i>          | C                   | -0.002  | 0.002        | -0.009 - 0.006 | 0.631 | 0.528 | 67,304 |
| 16 | <i>DBH</i>    | <i>rs1611115</i>       | T                   | -0.005  | 0.003        | -0.013 - 0.004 | 1.712 | 0.087 | 66,231 |

Note: Logistic regression weights for Severe recurrent MDD (MHF) on variant  $\times$  childhood trauma controlling for sex, age, age<sup>2</sup>, 10 European ancestry principle components, testing center, batch, variant/moderator main effects, and all variant  $\times$  covariate and moderator  $\times$  covariate effects, on the additive scale.

Table S9.16: Severe recurrent MDD (MHF) on variant  $\times$  TDI, alternate scale

|    | Gene          | Polymorphism           | Risk/counted allele | $\beta$ | $se_{\beta}$ | Corrected CI  | $ z $ | $p$   | $n$    |
|----|---------------|------------------------|---------------------|---------|--------------|---------------|-------|-------|--------|
| 1  | <i>SLC6A4</i> | <i>5-HTTLPR</i>        | Low activity        | 1.002   | 0.001        | 0.999 - 1.004 | 1.880 | 0.060 | 67,237 |
| 2  | <i>BDNF</i>   | <i>rs6265</i>          | A                   | 1.002   | 0.001        | 0.999 - 1.005 | 1.621 | 0.105 | 67,237 |
| 3  | <i>COMT</i>   | <i>rs4680</i>          | G                   | 1.001   | 0.001        | 0.998 - 1.003 | 0.799 | 0.424 | 67,237 |
| 4  | <i>HTR2A</i>  | <i>rs6311</i>          | A                   | 1.000   | 0.001        | 0.998 - 1.003 | 0.300 | 0.764 | 67,237 |
| 5  | <i>TPH1</i>   | <i>rs1800532</i>       | A                   | 1.000   | 0.001        | 0.998 - 1.003 | 0.113 | 0.910 | 67,237 |
| 6  | <i>DRD4</i>   | <i>VNTR</i>            | 7+ repeats          | 1.001   | 0.001        | 0.998 - 1.004 | 1.240 | 0.215 | 67,237 |
| 7  | <i>DRD2</i>   | <i>rs1800497</i>       | T                   | 1.000   | 0.001        | 0.997 - 1.003 | 0.340 | 0.734 | 67,237 |
| 8  | <i>MAOA</i>   | <i>VNTR</i>            | 2, 3, or 5 repeats  | 1.000   | 0.001        | 0.998 - 1.002 | 0.427 | 0.669 | 67,237 |
| 9  | <i>APOE</i>   | <i>rs429358/rs7412</i> | $\epsilon$ -4       | 1.001   | 0.001        | 0.997 - 1.004 | 0.597 | 0.551 | 67,237 |
| 10 | <i>MTHFR</i>  | <i>rs1801133</i>       | T                   | 1.000   | 0.001        | 0.997 - 1.003 | 0.042 | 0.967 | 67,237 |
| 11 | <i>CLOCK</i>  | <i>rs1801260</i>       | C                   | 1.002   | 0.001        | 1.000 - 1.005 | 2.461 | 0.014 | 67,237 |
| 12 | <i>SLC6A3</i> | <i>VNTR</i>            | 10+ repeats         | 1.001   | 0.001        | 0.998 - 1.004 | 1.266 | 0.205 | 67,237 |
| 13 | <i>ACE</i>    | <i>in/del</i>          | deletion            | 1.001   | 0.001        | 0.999 - 1.004 | 1.369 | 0.171 | 67,237 |
| 14 | <i>ABCB1</i>  | <i>rs1045642</i>       | C                   | 1.000   | 0.001        | 0.998 - 1.003 | 0.390 | 0.697 | 67,237 |
| 15 | <i>DRD3</i>   | <i>rs6280</i>          | C                   | 1.000   | 0.001        | 0.998 - 1.003 | 0.428 | 0.668 | 67,237 |
| 16 | <i>DBH</i>    | <i>rs1611115</i>       | T                   | 1.001   | 0.001        | 0.998 - 1.004 | 1.384 | 0.166 | 66,165 |

Note: Linear regression weights for Severe recurrent MDD (MHF) on variant  $\times$  TDI controlling for sex, age, age<sup>2</sup>, 10 European ancestry principle components, testing center, batch, variant/moderator main effects, and all variant  $\times$  covariate and moderator  $\times$  covariate effects, on the additive scale.

## S10 Polymorphism level $G \times E$ effects (improper control)

Table S10.1: Estimated lifetime MDD diagnosis on variant  $\times$  childhood trauma, improper control

|           | Gene          | Polymorphism           | Risk/counted allele | $\beta$ | $se_{\beta}$ | Corrected CI   | $ z $ | $p$   | $n$     |
|-----------|---------------|------------------------|---------------------|---------|--------------|----------------|-------|-------|---------|
| <b>1</b>  | <i>SLC6A4</i> | <i>5-HTTLPR</i>        | Low activity        | -0.001  | 0.022        | -0.066 - 0.064 | 0.052 | 0.959 | 115,204 |
| <b>2</b>  | <i>BDNF</i>   | <i>rs6265</i>          | A                   | 0.006   | 0.029        | -0.079 - 0.090 | 0.201 | 0.841 | 115,204 |
| <b>3</b>  | <i>COMT</i>   | <i>rs4680</i>          | G                   | -0.012  | 0.022        | -0.078 - 0.053 | 0.549 | 0.583 | 115,204 |
| <b>4</b>  | <i>HTR2A</i>  | <i>rs6311</i>          | A                   | -0.031  | 0.023        | -0.098 - 0.036 | 1.385 | 0.166 | 115,204 |
| <b>5</b>  | <i>TPH1</i>   | <i>rs1800532</i>       | A                   | 0.022   | 0.023        | -0.045 - 0.089 | 0.968 | 0.333 | 115,204 |
| <b>6</b>  | <i>DRD4</i>   | <i>VNTR</i>            | 7+ repeats          | -0.006  | 0.027        | -0.084 - 0.073 | 0.206 | 0.837 | 115,204 |
| <b>7</b>  | <i>DRD2</i>   | <i>rs1800497</i>       | T                   | -0.024  | 0.028        | -0.106 - 0.057 | 0.889 | 0.374 | 115,204 |
| <b>8</b>  | <i>MAOA</i>   | <i>VNTR</i>            | 2, 3, or 5 repeats  | -0.016  | 0.020        | -0.075 - 0.043 | 0.803 | 0.422 | 115,204 |
| <b>9</b>  | <i>APOE</i>   | <i>rs429358/rs7412</i> | $\epsilon$ -4       | 0.038   | 0.031        | -0.054 - 0.130 | 1.217 | 0.224 | 115,204 |
| <b>10</b> | <i>MTHFR</i>  | <i>rs1801133</i>       | T                   | -0.010  | 0.023        | -0.079 - 0.060 | 0.408 | 0.684 | 115,204 |
| <b>11</b> | <i>CLOCK</i>  | <i>rs1801260</i>       | C                   | -0.007  | 0.025        | -0.081 - 0.067 | 0.287 | 0.774 | 115,204 |
| <b>12</b> | <i>SLC6A3</i> | <i>VNTR</i>            | 10+ repeats         | -0.047  | 0.025        | -0.122 - 0.028 | 1.842 | 0.065 | 115,204 |
| <b>13</b> | <i>ACE</i>    | <i>in/del</i>          | deletion            | 0.005   | 0.022        | -0.061 - 0.070 | 0.211 | 0.833 | 115,204 |
| <b>14</b> | <i>ABCB1</i>  | <i>rs1045642</i>       | C                   | -0.025  | 0.022        | -0.091 - 0.041 | 1.130 | 0.258 | 115,204 |
| <b>15</b> | <i>DRD3</i>   | <i>rs6280</i>          | C                   | -0.038  | 0.023        | -0.107 - 0.032 | 1.599 | 0.110 | 115,204 |
| <b>16</b> | <i>DBH</i>    | <i>rs1611115</i>       | T                   | -0.034  | 0.028        | -0.116 - 0.049 | 1.206 | 0.228 | 113,422 |

*Note:* Logistic regression weights for estimated lifetime MDD diagnosis on variant  $\times$  childhood trauma controlling for sex, age, age<sup>2</sup>, 10 European ancestry principle components, testing center, batch, variant/moderator main effects, and all variant  $\times$  covariate and moderator  $\times$  covariate effects, on the multiplicative scale.

Table S10.2: Estimated lifetime MDD diagnosis on variant  $\times$  adult trauma, improper control

|           | Gene          | Polymorphism           | Risk/counted allele | $\exp(\beta)$ | $se_{\beta}$ | Corrected CI  | $ z $ | $p$   | $n$     |
|-----------|---------------|------------------------|---------------------|---------------|--------------|---------------|-------|-------|---------|
| <b>1</b>  | <i>SLC6A4</i> | <i>5-HTTLPR</i>        | Low activity        | 1.019         | 0.020        | 0.961 - 1.081 | 0.938 | 0.348 | 115,249 |
| <b>2</b>  | <i>BDNF</i>   | <i>rs6265</i>          | A                   | 0.995         | 0.026        | 0.923 - 1.074 | 0.183 | 0.854 | 115,249 |
| <b>3</b>  | <i>COMT</i>   | <i>rs4680</i>          | G                   | 0.993         | 0.020        | 0.936 - 1.054 | 0.357 | 0.721 | 115,249 |
| <b>4</b>  | <i>HTR2A</i>  | <i>rs6311</i>          | A                   | 1.011         | 0.020        | 0.951 - 1.074 | 0.518 | 0.604 | 115,249 |
| <b>5</b>  | <i>TPH1</i>   | <i>rs1800532</i>       | A                   | 1.024         | 0.021        | 0.963 - 1.088 | 1.145 | 0.252 | 115,249 |
| <b>6</b>  | <i>DRD4</i>   | <i>VNTR</i>            | 7+ repeats          | 0.977         | 0.024        | 0.909 - 1.049 | 0.967 | 0.333 | 115,249 |
| <b>7</b>  | <i>DRD2</i>   | <i>rs1800497</i>       | T                   | 1.017         | 0.025        | 0.945 - 1.095 | 0.679 | 0.497 | 115,249 |
| <b>8</b>  | <i>MAOA</i>   | <i>VNTR</i>            | 2, 3, or 5 repeats  | 0.988         | 0.018        | 0.936 - 1.043 | 0.664 | 0.506 | 115,249 |
| <b>9</b>  | <i>APOE</i>   | <i>rs429358/rs7412</i> | $\epsilon$ -4       | 0.993         | 0.028        | 0.913 - 1.079 | 0.266 | 0.790 | 115,249 |
| <b>10</b> | <i>MTHFR</i>  | <i>rs1801133</i>       | T                   | 1.040         | 0.021        | 0.977 - 1.108 | 1.854 | 0.064 | 115,249 |
| <b>11</b> | <i>CLOCK</i>  | <i>rs1801260</i>       | C                   | 1.000         | 0.023        | 0.935 - 1.070 | 0.012 | 0.991 | 115,249 |
| <b>12</b> | <i>SLC6A3</i> | <i>VNTR</i>            | 10+ repeats         | 0.979         | 0.023        | 0.914 - 1.048 | 0.923 | 0.356 | 115,249 |
| <b>13</b> | <i>ACE</i>    | <i>in/del</i>          | deletion            | 1.000         | 0.020        | 0.942 - 1.061 | 0.008 | 0.994 | 115,249 |
| <b>14</b> | <i>ABCB1</i>  | <i>rs1045642</i>       | C                   | 0.989         | 0.020        | 0.932 - 1.050 | 0.540 | 0.589 | 115,249 |
| <b>15</b> | <i>DRD3</i>   | <i>rs6280</i>          | C                   | 0.985         | 0.021        | 0.925 - 1.049 | 0.704 | 0.482 | 115,249 |
| <b>16</b> | <i>DBH</i>    | <i>rs1611115</i>       | T                   | 0.969         | 0.025        | 0.900 - 1.044 | 1.236 | 0.216 | 113,466 |

*Note:* Logistic regression weights for estimated lifetime MDD diagnosis on variant  $\times$  adult trauma controlling for sex, age, age<sup>2</sup>, 10 European ancestry principle components, testing center, batch, variant/moderator main effects, and all variant  $\times$  covariate and moderator  $\times$  covariate effects, on the multiplicative scale.

Table S10.3: Estimated lifetime MDD diagnosis on variant  $\times$  TDI, improper control

|           | Gene          | Polymorphism           | Risk/counted allele | $\exp(\beta)$ | $se_{\beta}$ | Corrected CI  | $ z $ | $p$   | $n$     |
|-----------|---------------|------------------------|---------------------|---------------|--------------|---------------|-------|-------|---------|
| <b>1</b>  | <i>SLC6A4</i> | <i>5-HTTLPR</i>        | Low activity        | 1.011         | 0.010        | 0.981 - 1.042 | 1.088 | 0.277 | 115,138 |
| <b>2</b>  | <i>BDNF</i>   | <i>rs6265</i>          | A                   | 1.040         | 0.013        | 1.001 - 1.079 | 2.955 | 0.003 | 115,138 |
| <b>3</b>  | <i>COMT</i>   | <i>rs4680</i>          | G                   | 1.012         | 0.010        | 0.981 - 1.042 | 1.117 | 0.264 | 115,138 |
| <b>4</b>  | <i>HTR2A</i>  | <i>rs6311</i>          | A                   | 1.008         | 0.010        | 0.977 - 1.039 | 0.754 | 0.451 | 115,138 |
| <b>5</b>  | <i>TPH1</i>   | <i>rs1800532</i>       | A                   | 1.009         | 0.011        | 0.977 - 1.040 | 0.810 | 0.418 | 115,138 |
| <b>6</b>  | <i>DRD4</i>   | <i>VNTR</i>            | 7+ repeats          | 1.004         | 0.012        | 0.967 - 1.040 | 0.297 | 0.766 | 115,138 |
| <b>7</b>  | <i>DRD2</i>   | <i>rs1800497</i>       | T                   | 1.006         | 0.013        | 0.968 - 1.044 | 0.458 | 0.647 | 115,138 |
| <b>8</b>  | <i>MAOA</i>   | <i>VNTR</i>            | 2, 3, or 5 repeats  | 1.009         | 0.009        | 0.982 - 1.036 | 0.969 | 0.332 | 115,138 |
| <b>9</b>  | <i>APOE</i>   | <i>rs429358/rs7412</i> | $\epsilon$ -4       | 1.001         | 0.014        | 0.958 - 1.043 | 0.059 | 0.953 | 115,138 |
| <b>10</b> | <i>MTHFR</i>  | <i>rs1801133</i>       | T                   | 1.003         | 0.011        | 0.971 - 1.036 | 0.304 | 0.761 | 115,138 |
| <b>11</b> | <i>CLOCK</i>  | <i>rs1801260</i>       | C                   | 1.022         | 0.012        | 0.988 - 1.057 | 1.905 | 0.057 | 115,138 |
| <b>12</b> | <i>SLC6A3</i> | <i>VNTR</i>            | 10+ repeats         | 1.006         | 0.012        | 0.971 - 1.041 | 0.482 | 0.630 | 115,138 |
| <b>13</b> | <i>ACE</i>    | <i>in/del</i>          | deletion            | 1.006         | 0.010        | 0.975 - 1.036 | 0.557 | 0.577 | 115,138 |
| <b>14</b> | <i>ABCB1</i>  | <i>rs1045642</i>       | C                   | 1.002         | 0.010        | 0.971 - 1.032 | 0.158 | 0.875 | 115,138 |
| <b>15</b> | <i>DRD3</i>   | <i>rs6280</i>          | C                   | 1.004         | 0.011        | 0.972 - 1.036 | 0.346 | 0.730 | 115,138 |
| <b>16</b> | <i>DBH</i>    | <i>rs1611115</i>       | T                   | 1.007         | 0.013        | 0.970 - 1.045 | 0.564 | 0.572 | 113,356 |

*Note:* Logistic regression weights for estimated lifetime MDD diagnosis on variant  $\times$  TDI controlling for sex, age, age<sup>2</sup>, 10 European ancestry principle components, testing center, batch and variant/moderator main effects.

Table S10.4: Current MDD severity (MHF) on variant  $\times$  recent trauma, improper control

|           | Gene          | Polymorphism           | Risk/counted allele | $\beta$ | $se_{\beta}$ | Corrected CI   | $ z $ | $p$   | $n$     |
|-----------|---------------|------------------------|---------------------|---------|--------------|----------------|-------|-------|---------|
| <b>1</b>  | <i>SLC6A4</i> | <i>5-HTTLPR</i>        | Low activity        | -0.014  | 0.019        | -0.069 - 0.041 | 0.741 | 0.458 | 115,246 |
| <b>2</b>  | <i>BDNF</i>   | <i>rs6265</i>          | A                   | 0.011   | 0.024        | -0.061 - 0.082 | 0.440 | 0.660 | 115,246 |
| <b>3</b>  | <i>COMT</i>   | <i>rs4680</i>          | G                   | -0.018  | 0.019        | -0.074 - 0.037 | 0.963 | 0.336 | 115,246 |
| <b>4</b>  | <i>HTR2A</i>  | <i>rs6311</i>          | A                   | 0.003   | 0.019        | -0.053 - 0.059 | 0.168 | 0.867 | 115,246 |
| <b>5</b>  | <i>TPH1</i>   | <i>rs1800532</i>       | A                   | 0.007   | 0.019        | -0.050 - 0.064 | 0.355 | 0.722 | 115,246 |
| <b>6</b>  | <i>DRD4</i>   | <i>VNTR</i>            | 7+ repeats          | -0.002  | 0.022        | -0.068 - 0.064 | 0.096 | 0.924 | 115,246 |
| <b>7</b>  | <i>DRD2</i>   | <i>rs1800497</i>       | T                   | -0.021  | 0.023        | -0.089 - 0.048 | 0.895 | 0.371 | 115,246 |
| <b>8</b>  | <i>MAOA</i>   | <i>VNTR</i>            | 2, 3, or 5 repeats  | 0.011   | 0.016        | -0.037 - 0.060 | 0.699 | 0.484 | 115,246 |
| <b>9</b>  | <i>APOE</i>   | <i>rs429358/rs7412</i> | $\epsilon$ -4       | -0.051  | 0.027        | -0.129 - 0.028 | 1.906 | 0.057 | 115,246 |
| <b>10</b> | <i>MTHFR</i>  | <i>rs1801133</i>       | T                   | 0.003   | 0.020        | -0.055 - 0.062 | 0.175 | 0.861 | 115,246 |
| <b>11</b> | <i>CLOCK</i>  | <i>rs1801260</i>       | C                   | 0.008   | 0.021        | -0.054 - 0.070 | 0.383 | 0.702 | 115,246 |
| <b>12</b> | <i>SLC6A3</i> | <i>VNTR</i>            | 10+ repeats         | -0.005  | 0.021        | -0.068 - 0.058 | 0.233 | 0.816 | 115,246 |
| <b>13</b> | <i>ACE</i>    | <i>in/del</i>          | deletion            | 0.001   | 0.019        | -0.055 - 0.056 | 0.049 | 0.961 | 115,246 |
| <b>14</b> | <i>ABCB1</i>  | <i>rs1045642</i>       | C                   | 0.035   | 0.019        | -0.021 - 0.090 | 1.863 | 0.062 | 115,246 |
| <b>15</b> | <i>DRD3</i>   | <i>rs6280</i>          | C                   | -0.032  | 0.020        | -0.090 - 0.026 | 1.646 | 0.100 | 115,246 |
| <b>16</b> | <i>DBH</i>    | <i>rs1611115</i>       | T                   | -0.015  | 0.023        | -0.084 - 0.054 | 0.651 | 0.515 | 113,463 |

*Note:* Negative binomial regression weights for current MDD severity (MHF) on variant  $\times$  recent trauma controlling for sex, age, age<sup>2</sup>, 10 European ancestry principle components, testing center, batch, variant/moderator main effects, and all variant  $\times$  covariate and moderator  $\times$  covariate effects, on the multiplicative scale.



Table S10.5: Conditional lifetime symptom count on variant  $\times$  childhood trauma, improper control

|    | Gene          | Polymorphism           | Risk/counted allele | $\exp(\beta)$ | $se_{\beta}$ | Corrected CI  | $ z $ | $p$   | $n$    |
|----|---------------|------------------------|---------------------|---------------|--------------|---------------|-------|-------|--------|
| 1  | <i>SLC6A4</i> | <i>5-HTTLPR</i>        | Low activity        | 0.990         | 0.022        | 0.928 - 1.056 | 0.449 | 0.653 | 62,108 |
| 2  | <i>BDNF</i>   | <i>rs6265</i>          | A                   | 1.002         | 0.028        | 0.921 - 1.088 | 0.054 | 0.957 | 62,108 |
| 3  | <i>COMT</i>   | <i>rs4680</i>          | G                   | 1.008         | 0.022        | 0.945 - 1.076 | 0.374 | 0.708 | 62,108 |
| 4  | <i>HTR2A</i>  | <i>rs6311</i>          | A                   | 1.007         | 0.022        | 0.943 - 1.076 | 0.325 | 0.745 | 62,108 |
| 5  | <i>TPH1</i>   | <i>rs1800532</i>       | A                   | 1.045         | 0.023        | 0.977 - 1.117 | 1.949 | 0.051 | 62,108 |
| 6  | <i>DRD4</i>   | <i>VNTR</i>            | 7+ repeats          | 1.011         | 0.027        | 0.935 - 1.094 | 0.417 | 0.677 | 62,108 |
| 7  | <i>DRD2</i>   | <i>rs1800497</i>       | T                   | 1.002         | 0.027        | 0.924 - 1.086 | 0.068 | 0.946 | 62,108 |
| 8  | <i>MAOA</i>   | <i>VNTR</i>            | 2, 3, or 5 repeats  | 0.982         | 0.020        | 0.925 - 1.041 | 0.934 | 0.350 | 62,108 |
| 9  | <i>APOE</i>   | <i>rs429358/rs7412</i> | $\epsilon$ -4       | 1.004         | 0.031        | 0.916 - 1.099 | 0.121 | 0.904 | 62,108 |
| 10 | <i>MTHFR</i>  | <i>rs1801133</i>       | T                   | 0.983         | 0.023        | 0.917 - 1.053 | 0.747 | 0.455 | 62,108 |
| 11 | <i>CLOCK</i>  | <i>rs1801260</i>       | C                   | 0.992         | 0.025        | 0.922 - 1.067 | 0.323 | 0.746 | 62,108 |
| 12 | <i>SLC6A3</i> | <i>VNTR</i>            | 10+ repeats         | 0.970         | 0.025        | 0.901 - 1.045 | 1.210 | 0.226 | 62,108 |
| 13 | <i>ACE</i>    | <i>in/del</i>          | deletion            | 0.993         | 0.022        | 0.930 - 1.059 | 0.330 | 0.742 | 62,108 |
| 14 | <i>ABCB1</i>  | <i>rs1045642</i>       | C                   | 1.030         | 0.022        | 0.965 - 1.099 | 1.347 | 0.178 | 62,108 |
| 15 | <i>DRD3</i>   | <i>rs6280</i>          | C                   | 0.953         | 0.023        | 0.890 - 1.021 | 2.052 | 0.040 | 62,108 |
| 16 | <i>DBH</i>    | <i>rs1611115</i>       | T                   | 1.001         | 0.028        | 0.923 - 1.086 | 0.041 | 0.967 | 61,178 |

Note: Linear regression weights for conditional lifetime symptom count on variant  $\times$  childhood trauma controlling for sex, age, age<sup>2</sup>, 10 European ancestry principle components, testing center, batch, variant/moderator main effects, and all variant  $\times$  covariate and moderator  $\times$  covariate effects, on the additive scale.

Table S10.6: Conditional lifetime symptom count on variant  $\times$  adult trauma, improper control

|    | Gene          | Polymorphism           | Risk/counted allele | $\exp(\beta)$ | $se_{\beta}$ | Corrected CI  | $ z $ | $p$   | $n$    |
|----|---------------|------------------------|---------------------|---------------|--------------|---------------|-------|-------|--------|
| 1  | <i>SLC6A4</i> | <i>5-HTTLPR</i>        | Low activity        | 1.006         | 0.020        | 0.949 - 1.065 | 0.282 | 0.778 | 62,135 |
| 2  | <i>BDNF</i>   | <i>rs6265</i>          | A                   | 1.028         | 0.025        | 0.954 - 1.107 | 1.099 | 0.272 | 62,135 |
| 3  | <i>COMT</i>   | <i>rs4680</i>          | G                   | 0.980         | 0.020        | 0.925 - 1.038 | 1.048 | 0.294 | 62,135 |
| 4  | <i>HTR2A</i>  | <i>rs6311</i>          | A                   | 0.996         | 0.020        | 0.939 - 1.057 | 0.187 | 0.852 | 62,135 |
| 5  | <i>TPH1</i>   | <i>rs1800532</i>       | A                   | 1.010         | 0.020        | 0.951 - 1.072 | 0.473 | 0.636 | 62,135 |
| 6  | <i>DRD4</i>   | <i>VNTR</i>            | 7+ repeats          | 0.978         | 0.024        | 0.912 - 1.049 | 0.940 | 0.347 | 62,135 |
| 7  | <i>DRD2</i>   | <i>rs1800497</i>       | T                   | 1.008         | 0.024        | 0.937 - 1.083 | 0.306 | 0.760 | 62,135 |
| 8  | <i>MAOA</i>   | <i>VNTR</i>            | 2, 3, or 5 repeats  | 0.978         | 0.018        | 0.928 - 1.031 | 1.235 | 0.217 | 62,135 |
| 9  | <i>APOE</i>   | <i>rs429358/rs7412</i> | $\epsilon$ -4       | 0.988         | 0.028        | 0.911 - 1.072 | 0.426 | 0.670 | 62,135 |
| 10 | <i>MTHFR</i>  | <i>rs1801133</i>       | T                   | 1.009         | 0.021        | 0.949 - 1.073 | 0.443 | 0.658 | 62,135 |
| 11 | <i>CLOCK</i>  | <i>rs1801260</i>       | C                   | 1.039         | 0.022        | 0.973 - 1.109 | 1.708 | 0.088 | 62,135 |
| 12 | <i>SLC6A3</i> | <i>VNTR</i>            | 10+ repeats         | 0.974         | 0.023        | 0.911 - 1.041 | 1.190 | 0.234 | 62,135 |
| 13 | <i>ACE</i>    | <i>in/del</i>          | deletion            | 1.025         | 0.020        | 0.967 - 1.087 | 1.256 | 0.209 | 62,135 |
| 14 | <i>ABCB1</i>  | <i>rs1045642</i>       | C                   | 0.997         | 0.020        | 0.941 - 1.056 | 0.165 | 0.869 | 62,135 |
| 15 | <i>DRD3</i>   | <i>rs6280</i>          | C                   | 0.977         | 0.021        | 0.919 - 1.039 | 1.112 | 0.266 | 62,135 |
| 16 | <i>DBH</i>    | <i>rs1611115</i>       | T                   | 0.969         | 0.025        | 0.901 - 1.042 | 1.275 | 0.202 | 61,205 |

Note: Linear regression weights for conditional lifetime symptom count on variant  $\times$  adult trauma controlling for sex, age, age<sup>2</sup>, 10 European ancestry principle components, testing center, batch, variant/moderator main effects, and all variant  $\times$  covariate and moderator  $\times$  covariate effects, on the additive scale.

Table S10.7: Conditional lifetime symptom count on variant  $\times$  TDI, improper control

|           | Gene          | Polymorphism           | Risk/counted allele | $\beta$ | $se_{\beta}$ | Corrected CI   | $ z $ | $p$   | $n$    |
|-----------|---------------|------------------------|---------------------|---------|--------------|----------------|-------|-------|--------|
| <b>1</b>  | <i>SLC6A4</i> | <i>5-HTTLPR</i>        | Low activity        | 0.003   | 0.010        | -0.028 - 0.033 | 0.250 | 0.802 | 62,069 |
| <b>2</b>  | <i>BDNF</i>   | <i>rs6265</i>          | A                   | 0.013   | 0.013        | -0.026 - 0.051 | 0.995 | 0.320 | 62,069 |
| <b>3</b>  | <i>COMT</i>   | <i>rs4680</i>          | G                   | 0.000   | 0.010        | -0.030 - 0.030 | 0.039 | 0.969 | 62,069 |
| <b>4</b>  | <i>HTR2A</i>  | <i>rs6311</i>          | A                   | 0.005   | 0.010        | -0.026 - 0.035 | 0.463 | 0.643 | 62,069 |
| <b>5</b>  | <i>TPH1</i>   | <i>rs1800532</i>       | A                   | -0.006  | 0.010        | -0.037 - 0.025 | 0.602 | 0.547 | 62,069 |
| <b>6</b>  | <i>DRD4</i>   | <i>VNTR</i>            | 7+ repeats          | 0.007   | 0.012        | -0.029 - 0.043 | 0.563 | 0.573 | 62,069 |
| <b>7</b>  | <i>DRD2</i>   | <i>rs1800497</i>       | T                   | -0.014  | 0.013        | -0.051 - 0.024 | 1.087 | 0.277 | 62,069 |
| <b>8</b>  | <i>MAOA</i>   | <i>VNTR</i>            | 2, 3, or 5 repeats  | -0.025  | 0.009        | -0.052 - 0.003 | 2.665 | 0.008 | 62,069 |
| <b>9</b>  | <i>APOE</i>   | <i>rs429358/rs7412</i> | $\epsilon$ -4       | -0.001  | 0.014        | -0.043 - 0.041 | 0.071 | 0.944 | 62,069 |
| <b>10</b> | <i>MTHFR</i>  | <i>rs1801133</i>       | T                   | 0.006   | 0.011        | -0.026 - 0.037 | 0.510 | 0.610 | 62,069 |
| <b>11</b> | <i>CLOCK</i>  | <i>rs1801260</i>       | C                   | 0.008   | 0.011        | -0.026 - 0.042 | 0.703 | 0.482 | 62,069 |
| <b>12</b> | <i>SLC6A3</i> | <i>VNTR</i>            | 10+ repeats         | 0.003   | 0.012        | -0.031 - 0.037 | 0.259 | 0.796 | 62,069 |
| <b>13</b> | <i>ACE</i>    | <i>in/del</i>          | deletion            | -0.011  | 0.010        | -0.041 - 0.019 | 1.112 | 0.266 | 62,069 |
| <b>14</b> | <i>ABCB1</i>  | <i>rs1045642</i>       | C                   | 0.001   | 0.010        | -0.029 - 0.031 | 0.093 | 0.926 | 62,069 |
| <b>15</b> | <i>DRD3</i>   | <i>rs6280</i>          | C                   | -0.007  | 0.011        | -0.039 - 0.025 | 0.638 | 0.523 | 62,069 |
| <b>16</b> | <i>DBH</i>    | <i>rs1611115</i>       | T                   | -0.000  | 0.013        | -0.037 - 0.037 | 0.024 | 0.981 | 61,139 |

*Note:* Linear regression weights for conditional lifetime symptom count on variant  $\times$  TDI controlling for sex, age, age<sup>2</sup>, 10 European ancestry principle components, testing center, batch and variant/moderator main effects.

Table S10.8: Conditional lifetime symptom count on variant  $\times$  stressor-induced depression, improper control

|           | Gene          | Polymorphism           | Risk/counted allele | $\exp(\beta)$ | $se_{\beta}$ | Corrected CI  | $ z $ | $p$   | $n$    |
|-----------|---------------|------------------------|---------------------|---------------|--------------|---------------|-------|-------|--------|
| <b>1</b>  | <i>SLC6A4</i> | <i>5-HTTLPR</i>        | Low activity        | 0.966         | 0.022        | 0.906 - 1.031 | 1.575 | 0.115 | 61,888 |
| <b>2</b>  | <i>BDNF</i>   | <i>rs6265</i>          | A                   | 1.002         | 0.028        | 0.922 - 1.089 | 0.077 | 0.939 | 61,888 |
| <b>3</b>  | <i>COMT</i>   | <i>rs4680</i>          | G                   | 1.047         | 0.022        | 0.981 - 1.117 | 2.091 | 0.036 | 61,888 |
| <b>4</b>  | <i>HTR2A</i>  | <i>rs6311</i>          | A                   | 1.026         | 0.022        | 0.961 - 1.096 | 1.173 | 0.241 | 61,888 |
| <b>5</b>  | <i>TPH1</i>   | <i>rs1800532</i>       | A                   | 1.013         | 0.023        | 0.948 - 1.083 | 0.584 | 0.559 | 61,888 |
| <b>6</b>  | <i>DRD4</i>   | <i>VNTR</i>            | 7+ repeats          | 1.039         | 0.026        | 0.961 - 1.124 | 1.450 | 0.147 | 61,888 |
| <b>7</b>  | <i>DRD2</i>   | <i>rs1800497</i>       | T                   | 1.051         | 0.027        | 0.970 - 1.140 | 1.823 | 0.068 | 61,888 |
| <b>8</b>  | <i>MAOA</i>   | <i>VNTR</i>            | 2, 3, or 5 repeats  | 0.988         | 0.019        | 0.933 - 1.046 | 0.640 | 0.522 | 61,888 |
| <b>9</b>  | <i>APOE</i>   | <i>rs429358/rs7412</i> | $\epsilon$ -4       | 1.011         | 0.031        | 0.923 - 1.107 | 0.356 | 0.722 | 61,888 |
| <b>10</b> | <i>MTHFR</i>  | <i>rs1801133</i>       | T                   | 0.979         | 0.023        | 0.914 - 1.048 | 0.920 | 0.358 | 61,888 |
| <b>11</b> | <i>CLOCK</i>  | <i>rs1801260</i>       | C                   | 1.019         | 0.025        | 0.948 - 1.097 | 0.777 | 0.437 | 61,888 |
| <b>12</b> | <i>SLC6A3</i> | <i>VNTR</i>            | 10+ repeats         | 1.011         | 0.025        | 0.939 - 1.089 | 0.447 | 0.655 | 61,888 |
| <b>13</b> | <i>ACE</i>    | <i>in/del</i>          | deletion            | 1.014         | 0.022        | 0.951 - 1.082 | 0.648 | 0.517 | 61,888 |
| <b>14</b> | <i>ABCB1</i>  | <i>rs1045642</i>       | C                   | 1.018         | 0.022        | 0.954 - 1.086 | 0.813 | 0.416 | 61,888 |
| <b>15</b> | <i>DRD3</i>   | <i>rs6280</i>          | C                   | 0.958         | 0.023        | 0.895 - 1.026 | 1.853 | 0.064 | 61,888 |
| <b>16</b> | <i>DBH</i>    | <i>rs1611115</i>       | T                   | 1.027         | 0.027        | 0.947 - 1.113 | 0.969 | 0.332 | 60,960 |

*Note:* Linear regression weights for conditional lifetime symptom count on variant  $\times$  stressor-induced depression controlling for sex, age, age<sup>2</sup>, 10 European ancestry principle components, testing center, batch, variant/moderator main effects, and all variant  $\times$  covariate and moderator  $\times$  covariate effects, on the additive scale.

Table S10.9: Lifetime episode count on variant  $\times$  childhood trauma, improper control

|           | Gene          | Polymorphism           | Risk/counted allele | $\exp(\beta)$ | $se_{\beta}$ | Corrected CI  | $ z $ | $p$   | $n$     |
|-----------|---------------|------------------------|---------------------|---------------|--------------|---------------|-------|-------|---------|
| <b>1</b>  | <i>SLC6A4</i> | <i>5-HTTLPR</i>        | Low activity        | 1.002         | 0.019        | 0.947 - 1.060 | 0.108 | 0.914 | 112,216 |
| <b>2</b>  | <i>BDNF</i>   | <i>rs6265</i>          | A                   | 1.018         | 0.025        | 0.946 - 1.095 | 0.705 | 0.481 | 112,216 |
| <b>3</b>  | <i>COMT</i>   | <i>rs4680</i>          | G                   | 0.986         | 0.019        | 0.932 - 1.044 | 0.723 | 0.470 | 112,216 |
| <b>4</b>  | <i>HTR2A</i>  | <i>rs6311</i>          | A                   | 0.977         | 0.020        | 0.922 - 1.035 | 1.202 | 0.229 | 112,216 |
| <b>5</b>  | <i>TPH1</i>   | <i>rs1800532</i>       | A                   | 0.994         | 0.020        | 0.938 - 1.054 | 0.294 | 0.769 | 112,216 |
| <b>6</b>  | <i>DRD4</i>   | <i>VNTR</i>            | 7+ repeats          | 1.003         | 0.023        | 0.937 - 1.074 | 0.129 | 0.897 | 112,216 |
| <b>7</b>  | <i>DRD2</i>   | <i>rs1800497</i>       | T                   | 1.003         | 0.024        | 0.934 - 1.076 | 0.106 | 0.916 | 112,216 |
| <b>8</b>  | <i>MAOA</i>   | <i>VNTR</i>            | 2, 3, or 5 repeats  | 0.983         | 0.017        | 0.935 - 1.033 | 1.024 | 0.306 | 112,216 |
| <b>9</b>  | <i>APOE</i>   | <i>rs429358/rs7412</i> | $\epsilon$ -4       | 1.025         | 0.027        | 0.947 - 1.110 | 0.928 | 0.354 | 112,216 |
| <b>10</b> | <i>MTHFR</i>  | <i>rs1801133</i>       | T                   | 0.969         | 0.020        | 0.913 - 1.029 | 1.545 | 0.122 | 112,216 |
| <b>11</b> | <i>CLOCK</i>  | <i>rs1801260</i>       | C                   | 1.004         | 0.022        | 0.942 - 1.071 | 0.208 | 0.836 | 112,216 |
| <b>12</b> | <i>SLC6A3</i> | <i>VNTR</i>            | 10+ repeats         | 0.976         | 0.022        | 0.914 - 1.041 | 1.121 | 0.262 | 112,216 |
| <b>13</b> | <i>ACE</i>    | <i>in/del</i>          | deletion            | 0.990         | 0.019        | 0.936 - 1.048 | 0.499 | 0.618 | 112,216 |
| <b>14</b> | <i>ABCB1</i>  | <i>rs1045642</i>       | C                   | 0.976         | 0.019        | 0.922 - 1.033 | 1.275 | 0.202 | 112,216 |
| <b>15</b> | <i>DRD3</i>   | <i>rs6280</i>          | C                   | 0.995         | 0.020        | 0.937 - 1.057 | 0.232 | 0.817 | 112,216 |
| <b>16</b> | <i>DBH</i>    | <i>rs1611115</i>       | T                   | 0.969         | 0.024        | 0.903 - 1.040 | 1.313 | 0.189 | 110,469 |

*Note:* Ordinal logistic regression weights for lifetime episode count on variant  $\times$  childhood trauma controlling for sex, age, age<sup>2</sup>, 10 European ancestry principle components, testing center, batch, variant/moderator main effects, and all variant  $\times$  covariate and moderator  $\times$  covariate effects, on the multiplicative scale.

Table S10.10: Lifetime episode count on variant  $\times$  adult trauma, improper control

|           | Gene          | Polymorphism           | Risk/counted allele | $\exp(\beta)$ | $se_{\beta}$ | Corrected CI  | $ z $ | $p$   | $n$     |
|-----------|---------------|------------------------|---------------------|---------------|--------------|---------------|-------|-------|---------|
| <b>1</b>  | <i>SLC6A4</i> | <i>5-HTTLPR</i>        | Low activity        | 1.011         | 0.016        | 0.964 - 1.061 | 0.687 | 0.492 | 112,255 |
| <b>2</b>  | <i>BDNF</i>   | <i>rs6265</i>          | A                   | 0.986         | 0.021        | 0.927 - 1.049 | 0.676 | 0.499 | 112,255 |
| <b>3</b>  | <i>COMT</i>   | <i>rs4680</i>          | G                   | 0.999         | 0.016        | 0.951 - 1.048 | 0.084 | 0.933 | 112,255 |
| <b>4</b>  | <i>HTR2A</i>  | <i>rs6311</i>          | A                   | 0.998         | 0.017        | 0.950 - 1.049 | 0.117 | 0.907 | 112,255 |
| <b>5</b>  | <i>TPH1</i>   | <i>rs1800532</i>       | A                   | 1.010         | 0.017        | 0.961 - 1.062 | 0.598 | 0.550 | 112,255 |
| <b>6</b>  | <i>DRD4</i>   | <i>VNTR</i>            | 7+ repeats          | 1.006         | 0.020        | 0.949 - 1.066 | 0.294 | 0.769 | 112,255 |
| <b>7</b>  | <i>DRD2</i>   | <i>rs1800497</i>       | T                   | 1.009         | 0.020        | 0.950 - 1.072 | 0.458 | 0.647 | 112,255 |
| <b>8</b>  | <i>MAOA</i>   | <i>VNTR</i>            | 2, 3, or 5 repeats  | 1.008         | 0.015        | 0.965 - 1.053 | 0.549 | 0.583 | 112,255 |
| <b>9</b>  | <i>APOE</i>   | <i>rs429358/rs7412</i> | $\epsilon$ -4       | 1.005         | 0.023        | 0.939 - 1.075 | 0.212 | 0.832 | 112,255 |
| <b>10</b> | <i>MTHFR</i>  | <i>rs1801133</i>       | T                   | 1.031         | 0.017        | 0.980 - 1.086 | 1.768 | 0.077 | 112,255 |
| <b>11</b> | <i>CLOCK</i>  | <i>rs1801260</i>       | C                   | 0.999         | 0.019        | 0.946 - 1.055 | 0.047 | 0.962 | 112,255 |
| <b>12</b> | <i>SLC6A3</i> | <i>VNTR</i>            | 10+ repeats         | 1.000         | 0.019        | 0.946 - 1.057 | 0.009 | 0.993 | 112,255 |
| <b>13</b> | <i>ACE</i>    | <i>in/del</i>          | deletion            | 0.997         | 0.016        | 0.950 - 1.047 | 0.155 | 0.877 | 112,255 |
| <b>14</b> | <i>ABCB1</i>  | <i>rs1045642</i>       | C                   | 1.003         | 0.016        | 0.956 - 1.053 | 0.190 | 0.849 | 112,255 |
| <b>15</b> | <i>DRD3</i>   | <i>rs6280</i>          | C                   | 0.979         | 0.017        | 0.930 - 1.030 | 1.247 | 0.213 | 112,255 |
| <b>16</b> | <i>DBH</i>    | <i>rs1611115</i>       | T                   | 0.986         | 0.020        | 0.929 - 1.048 | 0.666 | 0.506 | 110,507 |

*Note:* Ordinal logistic regression weights for lifetime episode count on variant  $\times$  adult trauma controlling for sex, age, age<sup>2</sup>, 10 European ancestry principle components, testing center, batch, variant/moderator main effects, and all variant  $\times$  covariate and moderator  $\times$  covariate effects, on the multiplicative scale.

Table S10.11: Lifetime episode count on variant  $\times$  TDI, improper control

|           | Gene          | Polymorphism           | Risk/counted allele | $\exp(\beta)$ | $se_{\beta}$ | Corrected CI  | $ z $ | $p$   | $n$     |
|-----------|---------------|------------------------|---------------------|---------------|--------------|---------------|-------|-------|---------|
| <b>1</b>  | <i>SLC6A4</i> | <i>5-HTTLPR</i>        | Low activity        | 1.019         | 0.009        | 0.993 - 1.045 | 2.168 | 0.030 | 112,144 |
| <b>2</b>  | <i>BDNF</i>   | <i>rs6265</i>          | A                   | 1.022         | 0.011        | 0.989 - 1.055 | 1.946 | 0.052 | 112,144 |
| <b>3</b>  | <i>COMT</i>   | <i>rs4680</i>          | G                   | 1.009         | 0.009        | 0.984 - 1.035 | 1.074 | 0.283 | 112,144 |
| <b>4</b>  | <i>HTR2A</i>  | <i>rs6311</i>          | A                   | 1.005         | 0.009        | 0.978 - 1.031 | 0.522 | 0.601 | 112,144 |
| <b>5</b>  | <i>TPH1</i>   | <i>rs1800532</i>       | A                   | 1.003         | 0.009        | 0.976 - 1.029 | 0.315 | 0.752 | 112,144 |
| <b>6</b>  | <i>DRD4</i>   | <i>VNTR</i>            | 7+ repeats          | 1.006         | 0.011        | 0.975 - 1.038 | 0.602 | 0.547 | 112,144 |
| <b>7</b>  | <i>DRD2</i>   | <i>rs1800497</i>       | T                   | 1.010         | 0.011        | 0.977 - 1.042 | 0.896 | 0.370 | 112,144 |
| <b>8</b>  | <i>MAOA</i>   | <i>VNTR</i>            | 2, 3, or 5 repeats  | 1.001         | 0.008        | 0.978 - 1.024 | 0.177 | 0.859 | 112,144 |
| <b>9</b>  | <i>APOE</i>   | <i>rs429358/rs7412</i> | $\epsilon$ -4       | 1.007         | 0.012        | 0.971 - 1.043 | 0.556 | 0.578 | 112,144 |
| <b>10</b> | <i>MTHFR</i>  | <i>rs1801133</i>       | T                   | 1.004         | 0.009        | 0.977 - 1.032 | 0.445 | 0.656 | 112,144 |
| <b>11</b> | <i>CLOCK</i>  | <i>rs1801260</i>       | C                   | 1.019         | 0.010        | 0.990 - 1.048 | 1.906 | 0.057 | 112,144 |
| <b>12</b> | <i>SLC6A3</i> | <i>VNTR</i>            | 10+ repeats         | 1.004         | 0.010        | 0.974 - 1.033 | 0.355 | 0.723 | 112,144 |
| <b>13</b> | <i>ACE</i>    | <i>in/del</i>          | deletion            | 1.017         | 0.009        | 0.991 - 1.043 | 1.929 | 0.054 | 112,144 |
| <b>14</b> | <i>ABCB1</i>  | <i>rs1045642</i>       | C                   | 1.016         | 0.009        | 0.990 - 1.042 | 1.754 | 0.080 | 112,144 |
| <b>15</b> | <i>DRD3</i>   | <i>rs6280</i>          | C                   | 1.001         | 0.009        | 0.973 - 1.028 | 0.075 | 0.940 | 112,144 |
| <b>16</b> | <i>DBH</i>    | <i>rs1611115</i>       | T                   | 1.016         | 0.011        | 0.984 - 1.048 | 1.474 | 0.140 | 110,397 |

*Note:* Ordinal logistic regression weights for lifetime episode count on variant  $\times$  TDI controlling for sex, age, age<sup>2</sup>, 10 European ancestry principle components, testing center, batch and variant/moderator main effects.

Table S10.12: Touchscreen probable lifetime diagnosis on variant  $\times$  TDI, improper control

|           | Gene          | Polymorphism           | Risk/counted allele | $\exp(\beta)$ | $se_{\beta}$ | Corrected CI  | $ z $ | $p$   | $n$    |
|-----------|---------------|------------------------|---------------------|---------------|--------------|---------------|-------|-------|--------|
| <b>1</b>  | <i>SLC6A4</i> | <i>5-HTTLPR</i>        | Low activity        | 1.005         | 0.011        | 0.972 - 1.038 | 0.461 | 0.644 | 90,812 |
| <b>2</b>  | <i>BDNF</i>   | <i>rs6265</i>          | A                   | 1.015         | 0.014        | 0.973 - 1.058 | 1.064 | 0.287 | 90,812 |
| <b>3</b>  | <i>COMT</i>   | <i>rs4680</i>          | G                   | 1.008         | 0.011        | 0.974 - 1.041 | 0.686 | 0.493 | 90,812 |
| <b>4</b>  | <i>HTR2A</i>  | <i>rs6311</i>          | A                   | 1.000         | 0.012        | 0.966 - 1.034 | 0.021 | 0.983 | 90,812 |
| <b>5</b>  | <i>TPH1</i>   | <i>rs1800532</i>       | A                   | 1.022         | 0.012        | 0.988 - 1.056 | 1.904 | 0.057 | 90,812 |
| <b>6</b>  | <i>DRD4</i>   | <i>VNTR</i>            | 7+ repeats          | 1.003         | 0.014        | 0.963 - 1.043 | 0.218 | 0.828 | 90,812 |
| <b>7</b>  | <i>DRD2</i>   | <i>rs1800497</i>       | T                   | 1.014         | 0.014        | 0.972 - 1.056 | 0.978 | 0.328 | 90,812 |
| <b>8</b>  | <i>MAOA</i>   | <i>VNTR</i>            | 2, 3, or 5 repeats  | 1.002         | 0.010        | 0.972 - 1.031 | 0.162 | 0.872 | 90,812 |
| <b>9</b>  | <i>APOE</i>   | <i>rs429358/rs7412</i> | $\epsilon$ -4       | 1.023         | 0.016        | 0.977 - 1.069 | 1.469 | 0.142 | 90,812 |
| <b>10</b> | <i>MTHFR</i>  | <i>rs1801133</i>       | T                   | 1.007         | 0.012        | 0.972 - 1.043 | 0.611 | 0.541 | 90,812 |
| <b>11</b> | <i>CLOCK</i>  | <i>rs1801260</i>       | C                   | 1.013         | 0.013        | 0.975 - 1.050 | 0.973 | 0.330 | 90,812 |
| <b>12</b> | <i>SLC6A3</i> | <i>VNTR</i>            | 10+ repeats         | 1.024         | 0.013        | 0.985 - 1.062 | 1.808 | 0.071 | 90,812 |
| <b>13</b> | <i>ACE</i>    | <i>in/del</i>          | deletion            | 1.010         | 0.011        | 0.976 - 1.043 | 0.834 | 0.404 | 90,812 |
| <b>14</b> | <i>ABCB1</i>  | <i>rs1045642</i>       | C                   | 1.011         | 0.011        | 0.977 - 1.044 | 0.922 | 0.356 | 90,812 |
| <b>15</b> | <i>DRD3</i>   | <i>rs6280</i>          | C                   | 1.017         | 0.012        | 0.982 - 1.052 | 1.430 | 0.153 | 90,812 |
| <b>16</b> | <i>DBH</i>    | <i>rs1611115</i>       | T                   | 1.015         | 0.014        | 0.974 - 1.057 | 1.094 | 0.274 | 89,397 |

*Note:* Logistic regression weights for touchscreen probable lifetime diagnosis on variant  $\times$  TDI controlling for sex, age, age<sup>2</sup>, 10 European ancestry principle components, testing center, batch and variant/moderator main effects.

Table S10.13: Touchscreen probable lifetime diagnosis, ordinal classification on variant  $\times$  TDI, improper control

|           | Gene          | Polymorphism           | Risk/counted allele | $\exp(\beta)$ | $se_{\beta}$ | Corrected CI  | $ z $ | $p$   | $n$    |
|-----------|---------------|------------------------|---------------------|---------------|--------------|---------------|-------|-------|--------|
| <b>1</b>  | <i>SLC6A4</i> | <i>5-HTTLPR</i>        | Low activity        | 1.007         | 0.011        | 0.974 - 1.039 | 0.594 | 0.553 | 90,812 |
| <b>2</b>  | <i>BDNF</i>   | <i>rs6265</i>          | A                   | 1.020         | 0.014        | 0.979 - 1.062 | 1.426 | 0.154 | 90,812 |
| <b>3</b>  | <i>COMT</i>   | <i>rs4680</i>          | G                   | 1.004         | 0.011        | 0.971 - 1.037 | 0.338 | 0.736 | 90,812 |
| <b>4</b>  | <i>HTR2A</i>  | <i>rs6311</i>          | A                   | 1.003         | 0.011        | 0.970 - 1.036 | 0.262 | 0.794 | 90,812 |
| <b>5</b>  | <i>TPH1</i>   | <i>rs1800532</i>       | A                   | 1.022         | 0.011        | 0.988 - 1.055 | 1.888 | 0.059 | 90,812 |
| <b>6</b>  | <i>DRD4</i>   | <i>VNTR</i>            | 7+ repeats          | 1.004         | 0.013        | 0.964 - 1.043 | 0.263 | 0.793 | 90,812 |
| <b>7</b>  | <i>DRD2</i>   | <i>rs1800497</i>       | T                   | 1.004         | 0.014        | 0.963 - 1.045 | 0.300 | 0.764 | 90,812 |
| <b>8</b>  | <i>MAOA</i>   | <i>VNTR</i>            | 2, 3, or 5 repeats  | 1.002         | 0.010        | 0.973 - 1.031 | 0.223 | 0.823 | 90,812 |
| <b>9</b>  | <i>APOE</i>   | <i>rs429358/rs7412</i> | $\epsilon$ -4       | 1.027         | 0.015        | 0.981 - 1.072 | 1.717 | 0.086 | 90,812 |
| <b>10</b> | <i>MTHFR</i>  | <i>rs1801133</i>       | T                   | 1.005         | 0.012        | 0.970 - 1.039 | 0.403 | 0.687 | 90,812 |
| <b>11</b> | <i>CLOCK</i>  | <i>rs1801260</i>       | C                   | 1.007         | 0.013        | 0.970 - 1.045 | 0.587 | 0.557 | 90,812 |
| <b>12</b> | <i>SLC6A3</i> | <i>VNTR</i>            | 10+ repeats         | 1.022         | 0.013        | 0.985 - 1.059 | 1.726 | 0.084 | 90,812 |
| <b>13</b> | <i>ACE</i>    | <i>in/del</i>          | deletion            | 1.008         | 0.011        | 0.975 - 1.041 | 0.704 | 0.482 | 90,812 |
| <b>14</b> | <i>ABCB1</i>  | <i>rs1045642</i>       | C                   | 1.008         | 0.011        | 0.975 - 1.041 | 0.679 | 0.497 | 90,812 |
| <b>15</b> | <i>DRD3</i>   | <i>rs6280</i>          | C                   | 1.015         | 0.012        | 0.980 - 1.049 | 1.266 | 0.206 | 90,812 |
| <b>16</b> | <i>DBH</i>    | <i>rs1611115</i>       | T                   | 1.016         | 0.014        | 0.975 - 1.056 | 1.132 | 0.258 | 89,397 |

*Note:* Ordinal logistic regression weights for touchscreen probable lifetime diagnosis, ordinal classification on variant  $\times$  TDI controlling for sex, age, age<sup>2</sup>, 10 European ancestry principle components, testing center, batch and variant/moderator main effects.

## S11 Gene-level results

### S11.1 Gene-wise models

Table S11.1: Gene-wise  $p$ -values (primary analyses)

|                                                        | <i>SLC6A4</i> | <i>BDNF</i> | <i>COMT</i>   | <i>HTR2A</i> | <i>TPH1</i>  | <i>TPH2</i>  |
|--------------------------------------------------------|---------------|-------------|---------------|--------------|--------------|--------------|
| Estimated lifetime MDD diagnosis                       | .316          | .132        | .442          | .311         | .509         | .868         |
| Current MDD severity                                   | .539          | .066        | .027          | .593         | .318         | .541         |
| Severe recurrent depression                            | .282          | .360        | .459          | .362         | .394         | .969         |
| Conditional lifetime symptom count                     | .365          | .692        | .288          | .594         | .867         | .952         |
| Lifetime episode count                                 | .323          | .593        | .987          | .839         | .826         | .775         |
| Touchscreen probable diagnosis                         | .164          | .614        | .300          | .678         | .904         | .107         |
| Touchscreen probable diagnosis, ordinal classification | .253          | .498        | .203          | .478         | .995         | .037         |
| PGC lifetime MDD diagnosis                             | .100          | .600        | .700          | .800         | .100         | .700         |
|                                                        | <i>MAOA</i>   | <i>DRD2</i> | <i>DRD4</i>   | <i>MTHFR</i> | <i>APOE</i>  | <i>CLOCK</i> |
| Estimated lifetime MDD diagnosis                       | .297          | .180        | .509          | .351         | .509         | .531         |
| Current MDD severity                                   | .374          | .969        | .647          | .014         | .081         | .079         |
| Severe recurrent depression                            | .160          | .460        | .558          | .249         | .328         | .911         |
| Conditional lifetime symptom count                     | .134          | .154        | .284          | .805         | .231         | .569         |
| Lifetime episode count                                 | .573          | .428        | .204          | .713         | .254         | .918         |
| Touchscreen probable diagnosis                         | .293          | .112        | .133          | .727         | .500         | .143         |
| Touchscreen probable diagnosis, ordinal classification | .223          | .252        | .161          | .624         | .682         | .077         |
| PGC lifetime MDD diagnosis                             | .268          | 5.142e-07*  | .791          | .524         | .781         | .015         |
|                                                        | <i>SLC6A3</i> | <i>ACE</i>  | <i>DTNBP1</i> | <i>DRD3</i>  | <i>ABCB1</i> | <i>DBH</i>   |
| Estimated lifetime MDD diagnosis                       | .264          | .295        | .114          | .360         | .239         | .093         |
| Current MDD severity                                   | .051          | .529        | .134          | .314         | .114         | .519         |
| Severe recurrent depression                            | .152          | .710        | .133          | .892         | .633         | .165         |
| Conditional lifetime symptom count                     | .323          | .789        | .865          | .373         | .246         | .367         |
| Lifetime episode count                                 | .201          | .934        | .151          | .885         | .425         | .200         |
| Touchscreen probable diagnosis                         | .078          | .014        | .956          | .245         | .181         | .114         |
| Touchscreen probable diagnosis, ordinal classification | .068          | .057        | .973          | .058         | .316         | .045         |
| PGC lifetime MDD diagnosis                             | .758          | .221        | .690          | .637         | .888         | .765         |

Table S11.2: Gene-wise  $p$ -values (secondary analyses)

|                                                        | <i>SLC6A4</i> | <i>BDNF</i> | <i>COMT</i>   | <i>HTR2A</i> | <i>TPH1</i>  | <i>TPH2</i>  |
|--------------------------------------------------------|---------------|-------------|---------------|--------------|--------------|--------------|
| Estimated lifetime MDD diagnosis                       | .535          | .722        | .233          | .215         | .584         | .091         |
| Current MDD severity                                   | .379          | .548        | .144          | .475         | .801         | .179         |
| Severe recurrent depression                            | .174          | .392        | .488          | .462         | .505         | .845         |
| Conditional lifetime symptom count                     | .573          | .824        | .392          | .493         | .788         | .995         |
| Lifetime episode count                                 | .023          | .638        | .927          | .837         | .874         | .921         |
| Touchscreen probable diagnosis                         | .678          | .019        | .012          | .842         | .210         | .250         |
| Touchscreen probable diagnosis, ordinal classification | .262          | .857        | .277          | .852         | .844         | .639         |
| PGC lifetime MDD diagnosis                             | .275          | .886        | .708          | .837         | .281         | .358         |
|                                                        | <i>MAOA</i>   | <i>DRD2</i> | <i>DRD4</i>   | <i>MTHFR</i> | <i>APOE</i>  | <i>CLOCK</i> |
| Estimated lifetime MDD diagnosis                       | .463          | .006        | .654          | .563         | .306         | .100         |
| Current MDD severity                                   | .252          | .043        | .405          | .624         | .536         | .336         |
| Severe recurrent depression                            | .529          | .380        | .287          | .388         | .572         | .658         |
| Conditional lifetime symptom count                     | .599          | .226        | .098          | .425         | .370         | .684         |
| Lifetime episode count                                 | .598          | .155        | .043          | .851         | .623         | .567         |
| Touchscreen probable diagnosis                         | .084          | .908        | .375          | .006         | .585         | .227         |
| Touchscreen probable diagnosis, ordinal classification | .089          | .028        | .023          | .879         | .465         | .629         |
| PGC lifetime MDD diagnosis                             | .714          | .003        | .504          | .587         | .267         | .131         |
|                                                        | <i>SLC6A3</i> | <i>ACE</i>  | <i>DTNBP1</i> | <i>DRD3</i>  | <i>ABCB1</i> | <i>DBH</i>   |
| Estimated lifetime MDD diagnosis                       | .435          | .082        | .955          | .072         | .099         | .043         |
| Current MDD severity                                   | .379          | .013        | .835          | .201         | .077         | .133         |
| Severe recurrent depression                            | .047          | .529        | .115          | .852         | .735         | .004         |
| Conditional lifetime symptom count                     | .297          | .877        | .699          | .648         | .111         | .092         |
| Lifetime episode count                                 | .690          | .804        | .045          | .927         | .700         | .091         |
| Touchscreen probable diagnosis                         | .083          | .830        | .628          | .176         | .552         | .341         |
| Touchscreen probable diagnosis, ordinal classification | .455          | .384        | .607          | .713         | .436         | .188         |
| PGC lifetime MDD diagnosis                             | .925          | .092        | .580          | .307         | .427         | .880         |

\*Genome-wide significant at  $\alpha_{\text{gw}} = 2.61\text{e-}06$ .

Figure S11.1: Estimated lifetime MDD diagnosis: gene-wise tests

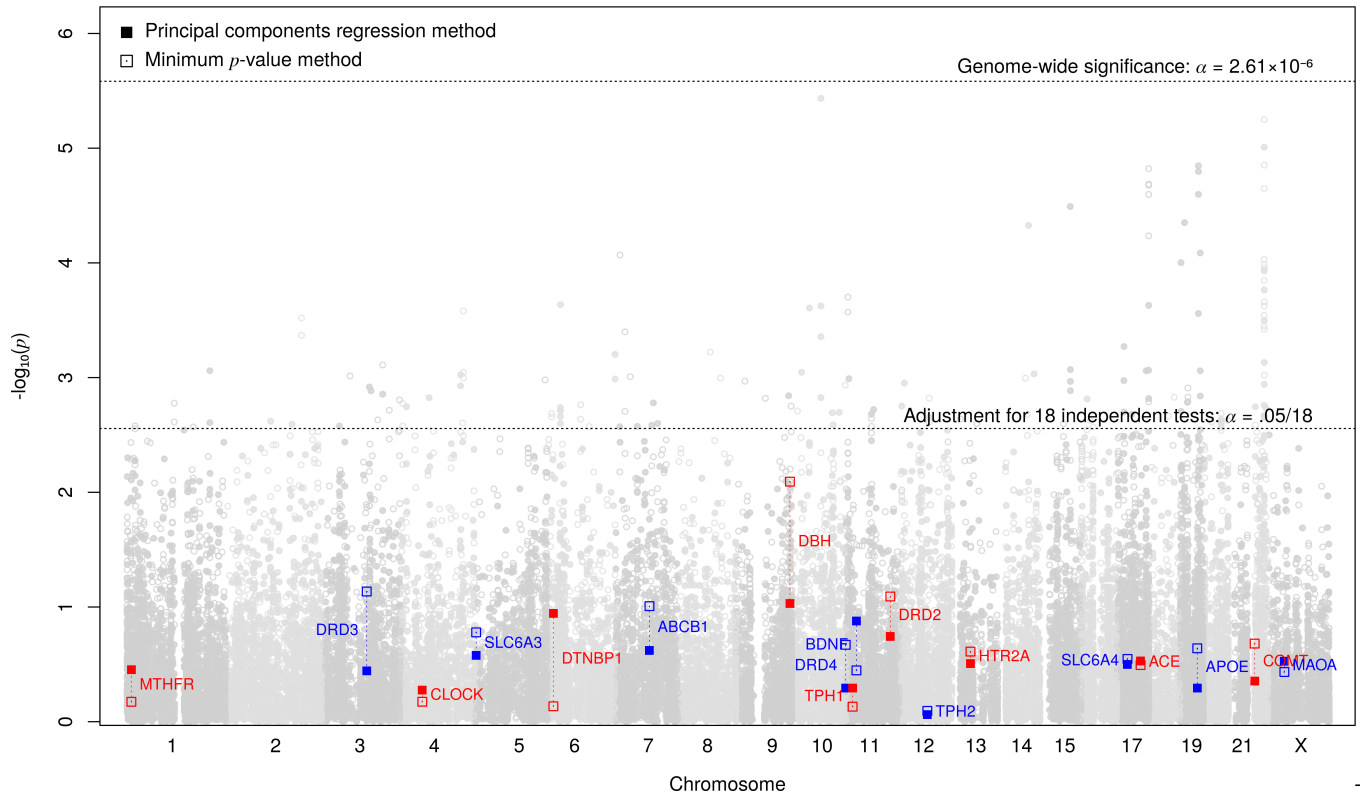

Figure S11.2: Current MDD severity: gene-wise tests

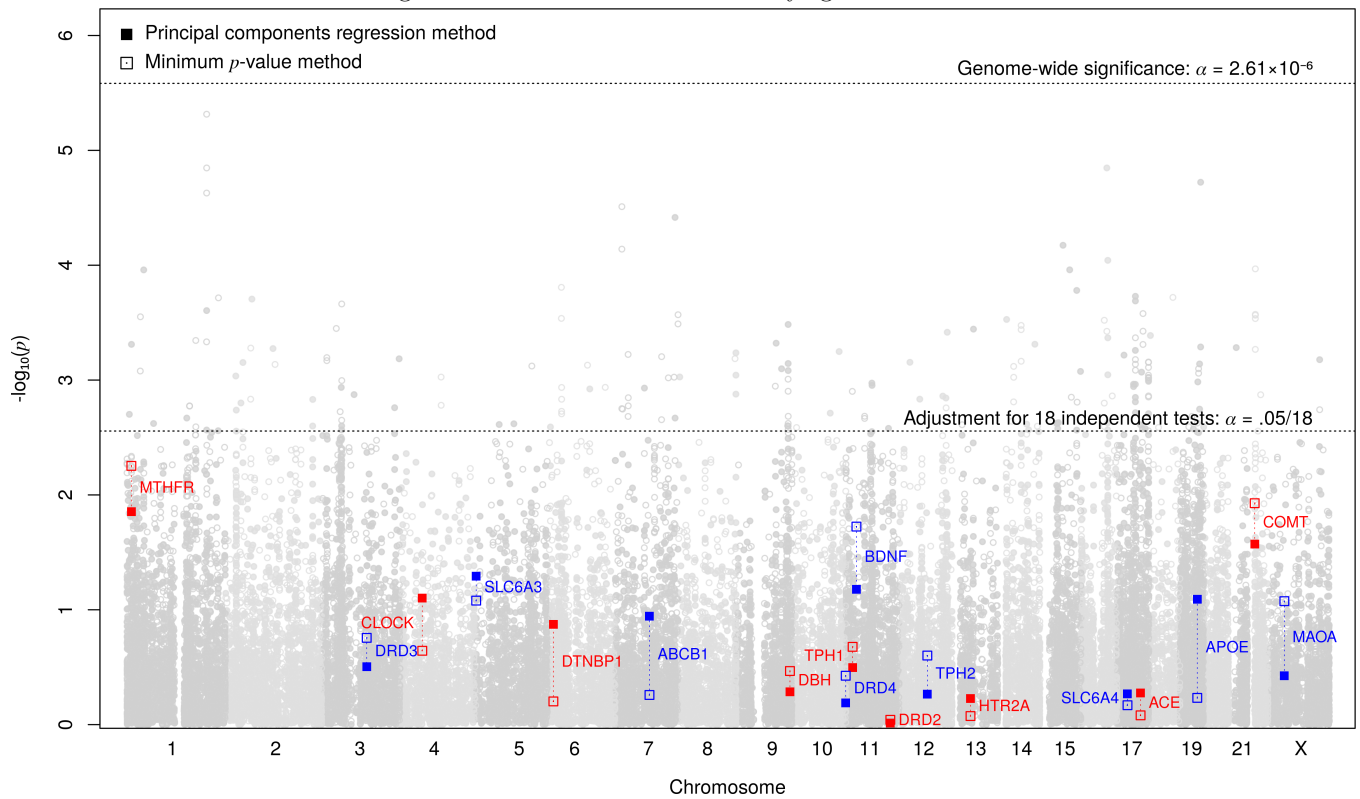

Figure S11.3: Conditional lifetime symptom count: gene-wise tests

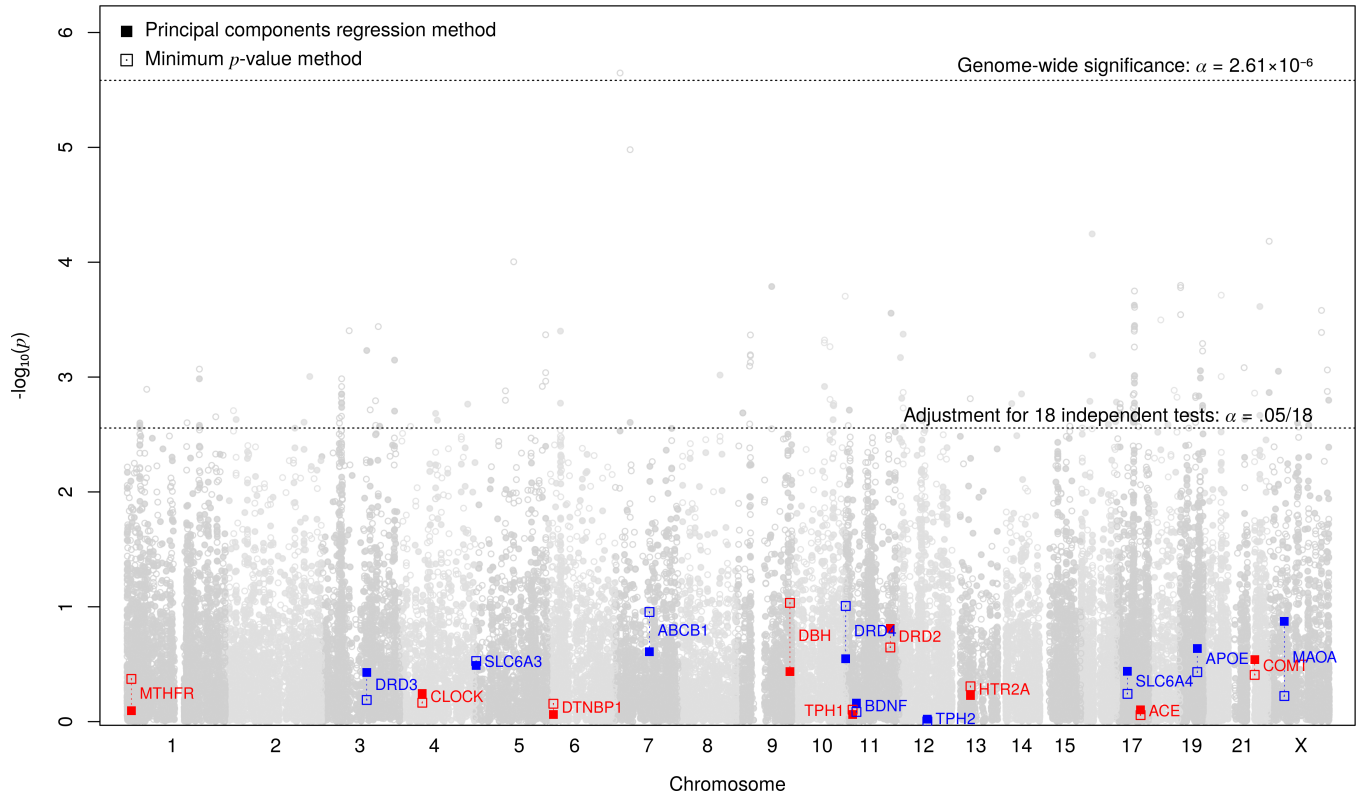

Figure S11.4: Lifetime episode count: gene-wise tests

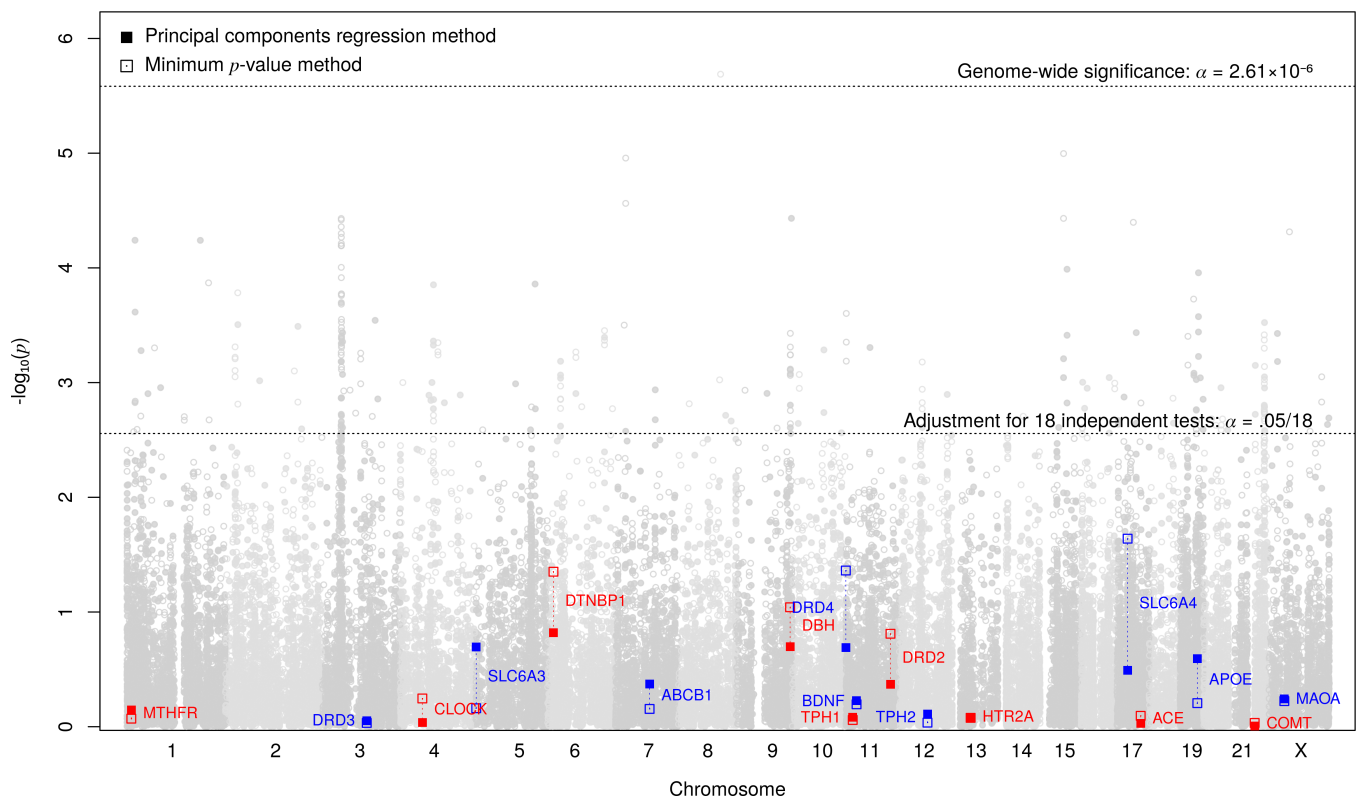



Figure S11.5: Touchscreen probable lifetime diagnosis, ordinal classification: gene-wise tests

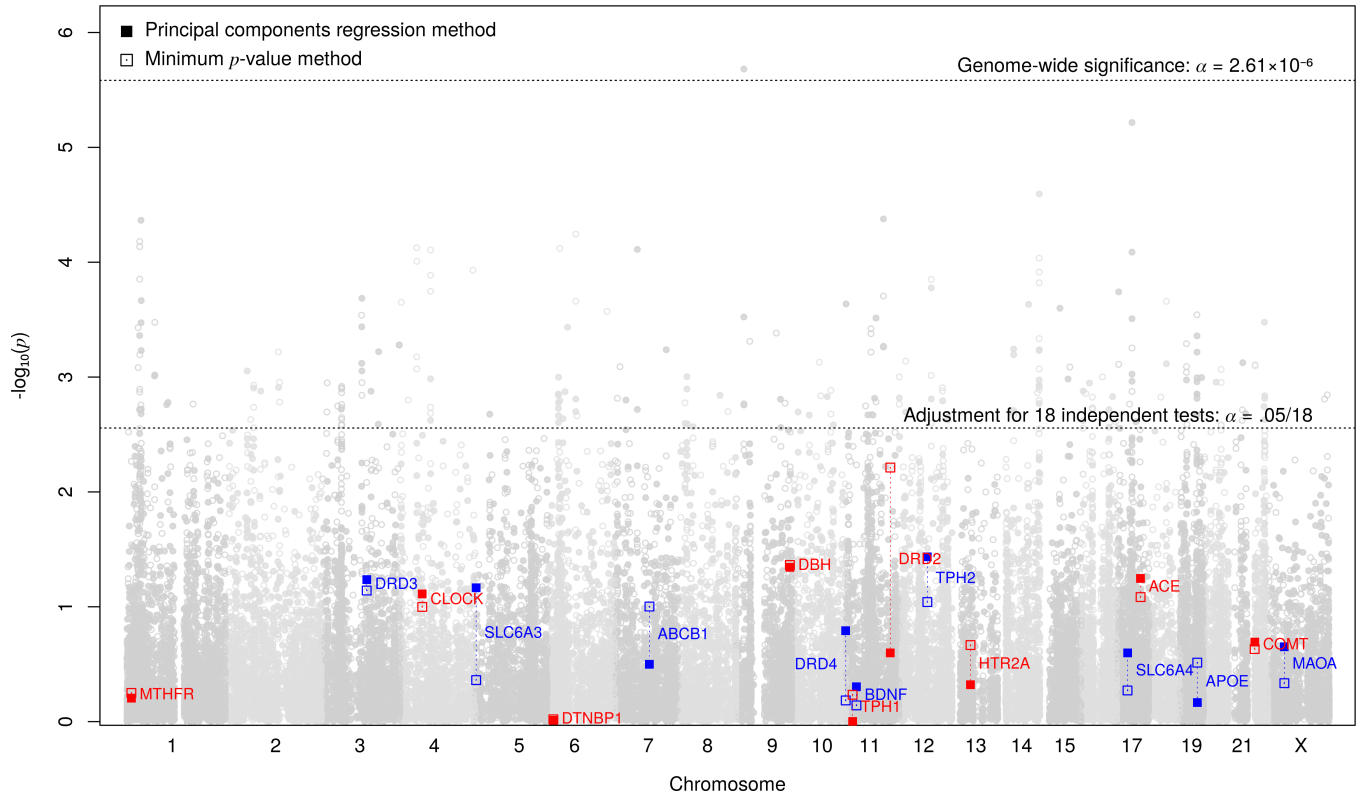

Figure S11.6: Touchscreen probable lifetime diagnosis: gene-wise tests

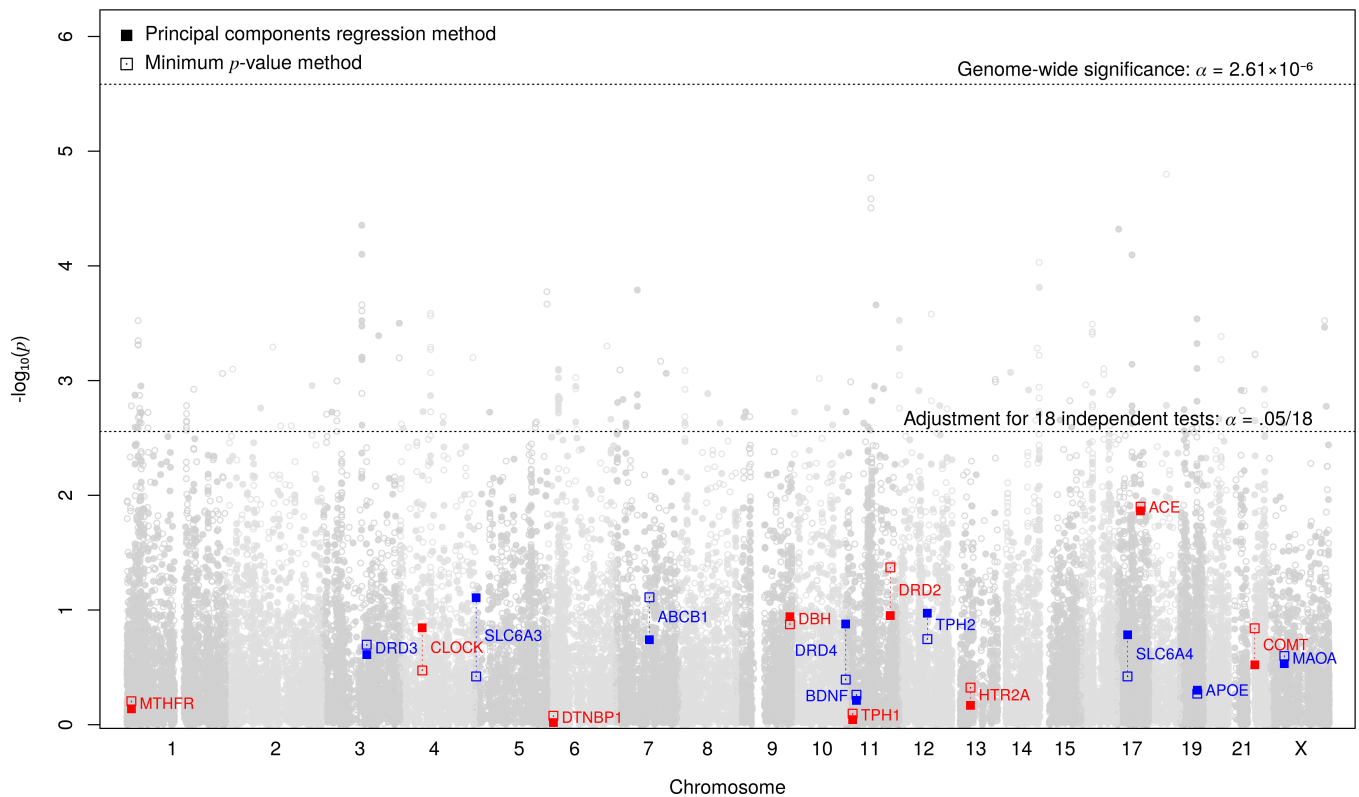

Figure S11.7: PGC lifetime diagnosis: gene-wise tests

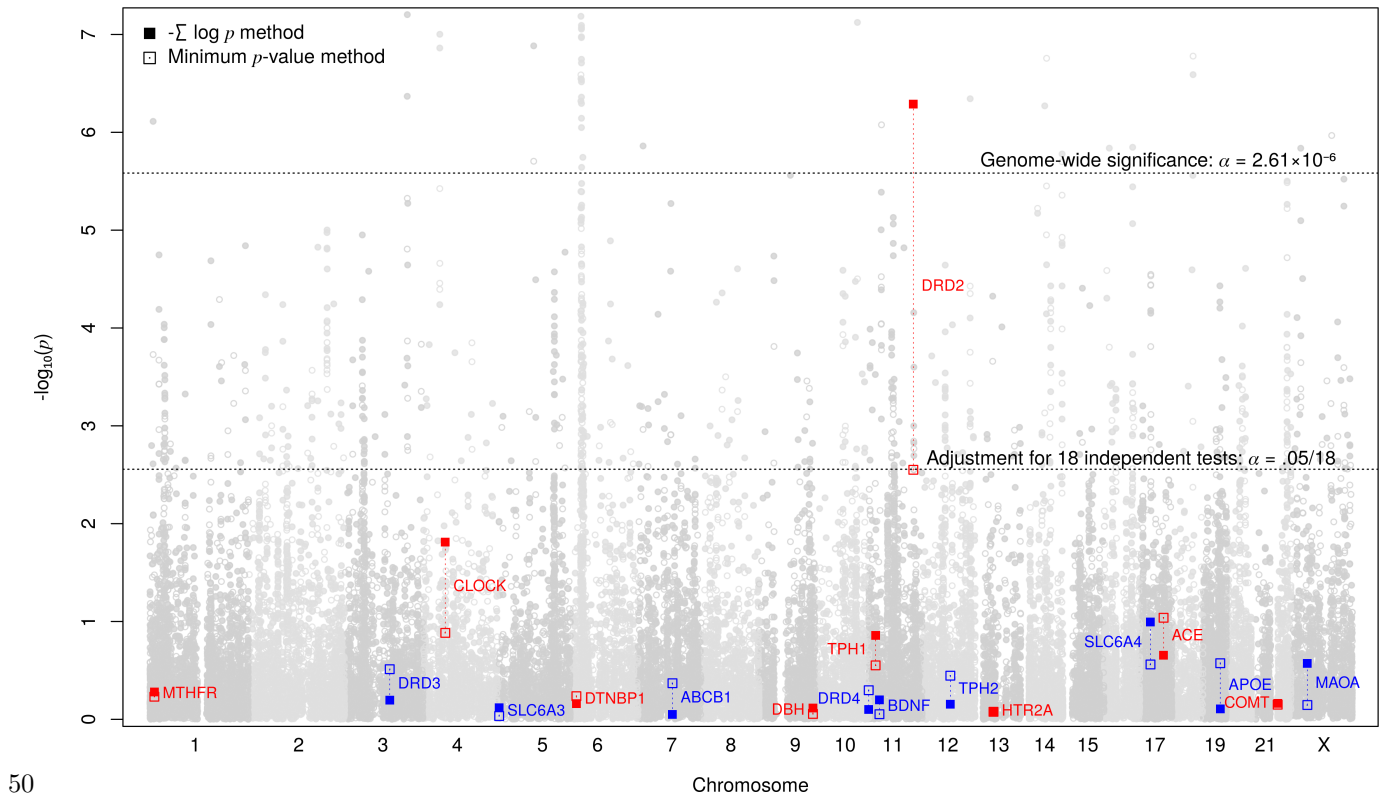

Figure S11.8: Severe recurrent depression: gene-wise tests

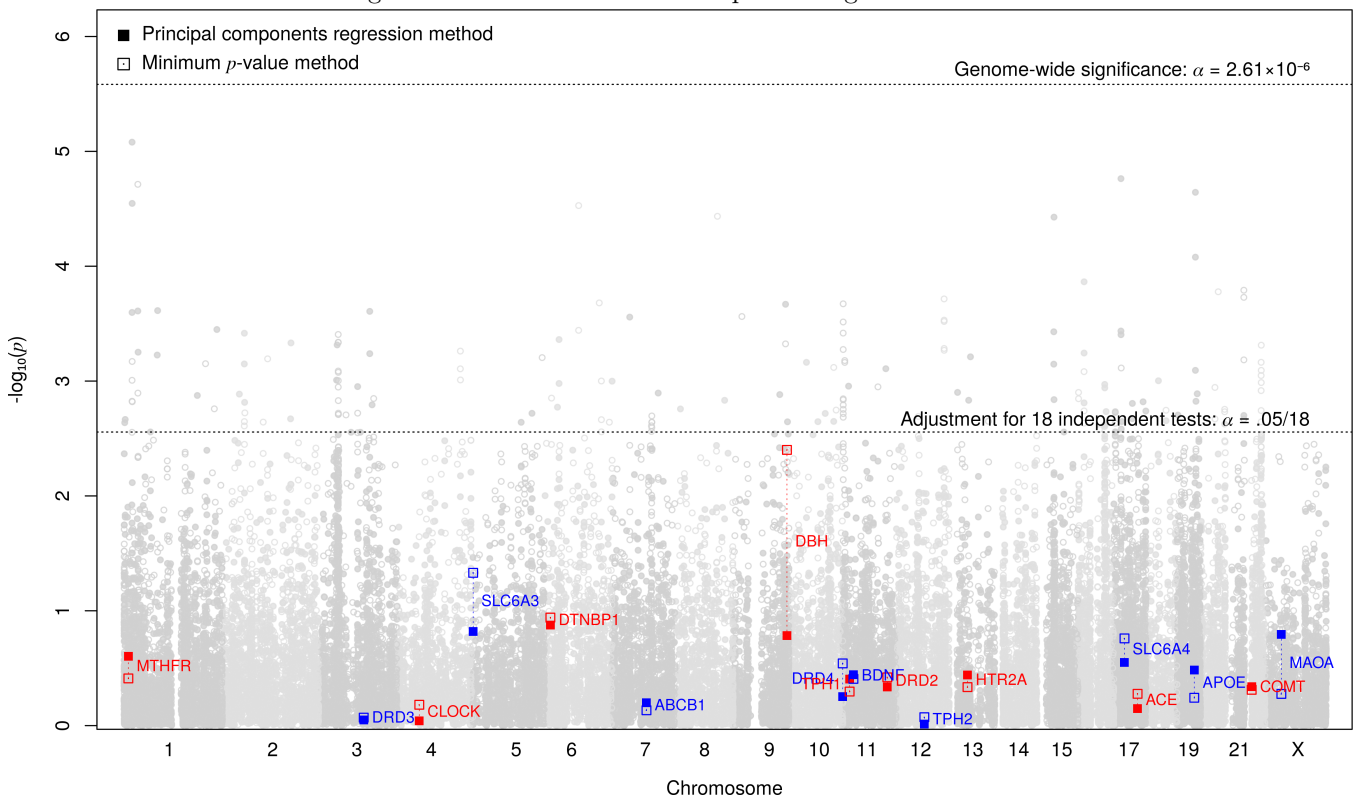

## S11.2 Gene-set models

### S11.2.1 Competitive tests

Table S11.3: Competitive gene-set tests (primary analyses)

| Phenotype                                              | $\beta$ | SE    | $p$  | $n$     |
|--------------------------------------------------------|---------|-------|------|---------|
| Estimated lifetime MDD diagnosis                       | 0.106   | 0.163 | 0.26 | 115,257 |
| Conditional lifetime symptom count                     | -0.014  | 0.162 | 0.53 | 62,138  |
| Lifetime episode count                                 | -0.163  | 0.162 | 0.84 | 112,261 |
| Touchscreen probable diagnosis                         | -0.046  | 0.165 | 0.61 | 90,944  |
| Touchscreen probable diagnosis, ordinal classification | 0.018   | 0.166 | 0.46 | 90,944  |
| Current MDD severity                                   | 0.129   | 0.162 | 0.21 | 115,257 |
| PGC lifetime MDD diagnosis                             | 0.213   | 0.216 | 0.16 | 329,462 |
| Severe recurrent depression                            | -0.018  | 0.163 | 0.55 | 67,304  |

Table S11.4: Competitive gene-set tests (secondary analyses)

| Phenotype                                              | $\beta$ | SE    | $p$  | $n$     |
|--------------------------------------------------------|---------|-------|------|---------|
| Estimated lifetime MDD diagnosis                       | 0.205   | 0.170 | 0.23 | 115,258 |
| Conditional lifetime symptom count                     | -0.050  | 0.170 | 0.77 | 62,138  |
| Lifetime episode count                                 | -0.117  | 0.170 | 0.49 | 112,262 |
| Touchscreen probable diagnosis                         | -0.014  | 0.173 | 0.93 | 90,945  |
| Touchscreen probable diagnosis, ordinal classification | 0.091   | 0.174 | 0.60 | 90,945  |
| Current MDD severity                                   | 0.125   | 0.170 | 0.46 | 115,258 |
| PGC lifetime MDD diagnosis                             | 0.117   | 0.225 | 0.60 | 329,463 |
| Severe recurrent depression                            | 0.053   | 0.170 | 0.76 | 67,304  |

## S11.2.2 Relative tests

Table S11.5: Relative gene-set tests (primary analyses)

| Phenotype                                              | Comparison         | $\beta$ | SE    | $p$   | $n$     |
|--------------------------------------------------------|--------------------|---------|-------|-------|---------|
| Estimated lifetime MDD diagnosis                       | Height             | 0.20    | 0.170 | 0.226 | 115,258 |
| Conditional lifetime symptom count                     | Height             | -0.05   | 0.170 | 0.767 | 62,138  |
| Lifetime episode count                                 | Height             | -0.12   | 0.170 | 0.492 | 112,262 |
| Touchscreen probable diagnosis                         | Height             | -0.01   | 0.173 | 0.934 | 90,945  |
| Touchscreen probable diagnosis, ordinal classification | Height             | 0.09    | 0.174 | 0.599 | 90,945  |
| Current MDD severity                                   | Height             | 0.12    | 0.170 | 0.463 | 115,258 |
| PGC lifetime MDD diagnosis                             | Height             | 0.12    | 0.225 | 0.604 | 329,463 |
| Severe recurrent depression                            | Height             | 0.05    | 0.170 | 0.755 | 67,304  |
| Estimated lifetime MDD diagnosis                       | Synaptic Processes | 0.10    | 0.165 | 0.537 | 115,260 |
| Conditional lifetime symptom count                     | Synaptic Processes | 0.01    | 0.166 | 0.961 | 62,138  |
| Lifetime episode count                                 | Synaptic Processes | -0.19   | 0.166 | 0.246 | 112,264 |
| Touchscreen probable diagnosis                         | Synaptic Processes | -0.10   | 0.168 | 0.536 | 90,947  |
| Touchscreen probable diagnosis, ordinal classification | Synaptic Processes | -0.03   | 0.169 | 0.842 | 90,947  |
| Current MDD severity                                   | Synaptic Processes | 0.15    | 0.166 | 0.356 | 115,260 |
| PGC lifetime MDD diagnosis                             | Synaptic Processes | 0.15    | 0.220 | 0.490 | 329,465 |
| Severe recurrent depression                            | Synaptic Processes | -0.04   | 0.166 | 0.814 | 67,304  |
| Estimated lifetime MDD diagnosis                       | Type 2 Diabetes    | 0.13    | 0.176 | 0.473 | 115,259 |
| Conditional lifetime symptom count                     | Type 2 Diabetes    | -0.11   | 0.177 | 0.518 | 62,138  |
| Lifetime episode count                                 | Type 2 Diabetes    | -0.06   | 0.176 | 0.748 | 112,263 |
| Touchscreen probable diagnosis                         | Type 2 Diabetes    | 0.01    | 0.179 | 0.958 | 90,946  |
| Touchscreen probable diagnosis, ordinal classification | Type 2 Diabetes    | 0.09    | 0.181 | 0.628 | 90,946  |
| Current MDD severity                                   | Type 2 Diabetes    | 0.18    | 0.177 | 0.315 | 115,259 |
| PGC lifetime MDD diagnosis                             | Type 2 Diabetes    | 0.18    | 0.231 | 0.428 | 329,464 |
| Severe recurrent depression                            | Type 2 Diabetes    | 0.14    | 0.177 | 0.432 | 67,304  |

Table S11.6: Relative gene-set tests (secondary analyses)

| Phenotype                                              | Comparison         | $\beta$ | SE    | $p$   | $n$     |
|--------------------------------------------------------|--------------------|---------|-------|-------|---------|
| Estimated lifetime MDD diagnosis                       | Height             | 0.341   | 0.201 | 0.089 | 115,262 |
| Conditional lifetime symptom count                     | Height             | -0.449  | 0.199 | 0.024 | 62,138  |
| Lifetime episode count                                 | Height             | -0.316  | 0.204 | 0.122 | 112,266 |
| Touchscreen probable diagnosis                         | Height             | 0.251   | 0.219 | 0.252 | 90,949  |
| Touchscreen probable diagnosis, ordinal classification | Height             | 0.223   | 0.221 | 0.313 | 90,949  |
| Current MDD severity                                   | Height             | 0.357   | 0.203 | 0.079 | 115,262 |
| PGC lifetime MDD diagnosis                             | Height             | 0.048   | 0.206 | 0.814 | 329,467 |
| Severe recurrent depression                            | Height             | 0.115   | 0.205 | 0.574 | 67,304  |
| Estimated lifetime MDD diagnosis                       | Synaptic Processes | 0.408   | 0.196 | 0.038 | 115,264 |
| Conditional lifetime symptom count                     | Synaptic Processes | -0.479  | 0.194 | 0.013 | 62,138  |
| Lifetime episode count                                 | Synaptic Processes | -0.350  | 0.200 | 0.080 | 112,268 |
| Touchscreen probable diagnosis                         | Synaptic Processes | 0.212   | 0.215 | 0.326 | 90,951  |
| Touchscreen probable diagnosis, ordinal classification | Synaptic Processes | 0.237   | 0.217 | 0.276 | 90,951  |
| Current MDD severity                                   | Synaptic Processes | 0.285   | 0.198 | 0.151 | 115,264 |
| PGC lifetime MDD diagnosis                             | Synaptic Processes | 0.006   | 0.203 | 0.975 | 329,469 |
| Severe recurrent depression                            | Synaptic Processes | 0.158   | 0.201 | 0.430 | 67,304  |
| Estimated lifetime MDD diagnosis                       | Type 2 Diabetes    | 0.292   | 0.209 | 0.162 | 115,263 |
| Conditional lifetime symptom count                     | Type 2 Diabetes    | -0.477  | 0.207 | 0.021 | 62,138  |
| Lifetime episode count                                 | Type 2 Diabetes    | -0.223  | 0.213 | 0.295 | 112,267 |
| Touchscreen probable diagnosis                         | Type 2 Diabetes    | 0.343   | 0.227 | 0.131 | 90,950  |
| Touchscreen probable diagnosis, ordinal classification | Type 2 Diabetes    | 0.291   | 0.229 | 0.203 | 90,950  |
| Current MDD severity                                   | Type 2 Diabetes    | 0.381   | 0.211 | 0.071 | 115,263 |
| PGC lifetime MDD diagnosis                             | Type 2 Diabetes    | 0.111   | 0.212 | 0.601 | 329,468 |
| Severe recurrent depression                            | Type 2 Diabetes    | 0.254   | 0.214 | 0.236 | 67,304  |

## S12 Attempted replication of top 16 independent PGC associations

Table S12.1: Attempted replication of top 16 independent PGC genome-wide significant loci in UKBB

| <i>I.</i> | <i>Variant</i>   | <i>Chr.</i> | <i>BP</i> | <i>Risk allele</i> | <i>Freq.</i> | <i>PPGC</i> | $OR_{PGC}^{Uncorrected}$ | $OR_{PGC}^{Corrected\dagger}$ | <i>Power<sup>‡</sup><sub>UKBB</sub></i> | $OR_{UKBB}$ | <i>se<sub>UKBB</sub></i> | <i>P<sub>UKBB</sub></i> | <i>n<sub>UKBB</sub></i> |
|-----------|------------------|-------------|-----------|--------------------|--------------|-------------|--------------------------|-------------------------------|-----------------------------------------|-------------|--------------------------|-------------------------|-------------------------|
| 1.        | rs12552          | 13          | 53625781  | A                  | 0.421        | 6.093e-15   | 1.044                    | 1.044                         | 0.941                                   | 1.037       | 0.010                    | 1.868e-04*              | 114,324                 |
| 2.        | rs1432639        | 1           | 72813218  | C                  | 0.601        | 1.065e-11   | 1.040                    | 1.040                         | 0.861                                   | 0.982       | 0.010                    | 6.383e-02               | 114,852                 |
| 3.        | rs10044618       | 5           | 87781168  | T                  | 0.550        | 2.416e-10   | 1.036                    | 1.036                         | 0.767                                   | 1.007       | 0.010                    | 5.037e-01               | 112,796                 |
| 4.        | rs12129573       | 1           | 73768366  | A                  | 0.322        | 4.556e-09   | 1.034                    | 1.029                         | 0.445                                   | 1.018       | 0.010                    | 7.401e-02               | 115,192                 |
| 5.        | rs834629         | 15          | 37678862  | C                  | 0.581        | 5.059e-09   | 0.967                    | 0.972                         | 0.506                                   | 1.010       | 0.010                    | 3.348e-01               | 114,830                 |
| 6.        | chr15_37664874.D | 15          | 37664874  | del                | 0.371        | 5.775e-09   | 1.034                    | 1.028                         | 0.433                                   | 1.007       | 0.010                    | 4.884e-01               | 114,148                 |
| 7.        | rs12886138       | 14          | 64871010  | T                  | 0.356        | 8.721e-09   | 0.968                    | 0.975                         | 0.339                                   | 0.997       | 0.010                    | 7.533e-01               | 111,943                 |
| 8.        | rs7198928        | 16          | 7666402   | C                  | 0.608        | 1.035e-08   | 1.033                    | 1.023                         | 0.253                                   | 0.985       | 0.010                    | 1.238e-01               | 111,672                 |
| 9.        | rs61867293       | 10          | 106563924 | T                  | 0.150        | 1.646e-08   | 0.961                    | 0.985                         | 0.033                                   | 0.977       | 0.012                    | 5.483e-02               | 113,996                 |
| 10.       | rs10214154       | 5           | 87545319  | G                  | 0.281        | 1.689e-08   | 1.037                    | 1.010                         | 0.023                                   | 0.997       | 0.011                    | 7.852e-01               | 113,303                 |
| 11.       | rs1806153        | 11          | 31850105  | T                  | 0.312        | 1.707e-08   | 1.039                    | 1.011                         | 0.029                                   | 1.014       | 0.011                    | 2.208e-01               | 114,910                 |
| 12.       | rs12658032       | 5           | 103904226 | A                  | 0.334        | 2.346e-08   | 1.033                    | 1.011                         | 0.032                                   | 1.033       | 0.010                    | 1.232e-03*              | 114,912                 |
| 13.       | rs11135349       | 5           | 164523472 | A                  | 0.418        | 2.480e-08   | 0.969                    | 0.998                         | 0.004                                   | 0.967       | 0.010                    | 4.805e-04*              | 115,120                 |
| 14.       | rs3095337        | 6           | 30737591  | C                  | 0.204        | 3.256e-08   | 0.960                    | 0.998                         | 0.004                                   | 0.953       | 0.018                    | 6.535e-03               | 115,122                 |
| 15.       | rs12958048       | 18          | 53101598  | A                  | 0.385        | 3.376e-08   | 1.033                    | 1.001                         | 0.003                                   | 1.027       | 0.010                    | 1.109e-02               | 114,873                 |
| 16.       | rs10514301       | 5           | 87939654  | T                  | 0.165        | 3.627e-08   | 1.047                    | 1.002                         | 0.003                                   | 1.024       | 0.015                    | 1.124e-01               | 114,704                 |

The top 16 independent genome-wide significant loci for PGC lifetime MDD diagnosis tested for association with estimated lifetime diagnosis in the independent UKBB sample. Estimated effect in the PGC were corrected for bias due to the winner's curse and used to estimate power to detect associations in the UKBB. Three loci were significant in the UKBB at  $p < .05/16$ . The 95% CI for the number of replications to be expected given power in the UKBB was 2 - 7 (S4.6). See S4.5 for further details.

<sup>†</sup>Unbiased estimator correcting for winner's curse ([38]); <sup>‡</sup>Power to detect corrected locus effects in UKBB at  $\alpha_{CG} = .05/16$ ; \*Significant at  $p < .05/16$ .

## References

- [1] Cock, P. J. A. *et al.* Biopython: freely available Python tools for computational molecular biology and bioinformatics. *Bioinformatics* **25**, 1422–1423 (2009). URL <https://academic.oup.com/bioinformatics/article/25/11/1422/330687>.
- [2] National Center for Biotechnology Information, US National Library of Medicine & National Institutes of Health. PubMed. URL <https://www.ncbi.nlm.nih.gov/pubmed/>.
- [3] HUGO Gene Nomenclature Committee (HGNC) & European Molecular Biology Laboratory. HGNC Database. URL [www.genenames.org](http://www.genenames.org).
- [4] Yates, B. *et al.* Genenames.org: the HGNC and VGNC resources in 2017. *Nucleic Acids Research* **45**, D619–D625 (2017).
- [5] Wang, W. Exact Optimal Confidence Intervals for Hypergeometric Parameters. *Journal of the American Statistical Association* **110**, 1491–1499 (2015). URL <https://doi.org/10.1080/01621459.2014.966191>.
- [6] Ferreira, M. A. R. *et al.* Collaborative genome-wide association analysis supports a role for ANK3 and CACNA1c in bipolar disorder. *Nature genetics* **40**, 1056–1058 (2008). URL <https://www.ncbi.nlm.nih.gov/pmc/articles/PMC2703780/>.
- [7] Willer, C. J., Li, Y. & Abecasis, G. R. METAL: fast and efficient meta-analysis of genomewide association scans. *Bioinformatics (Oxford, England)* **26**, 2190–2191 (2010).
- [8] Wray, N. R. *et al.* Genome-wide association analyses identify 44 risk variants and refine the genetic architecture of major depression. *Nature Genetics* **50**, 668–681 (2018). URL <https://www.nature.com/articles/s41588-018-0090-3>.
- [9] Bycroft, C. *et al.* Genome-wide genetic data on ~500,000 UK Biobank participants. *bioRxiv* 166298 (2017). URL <https://www.biorxiv.org/content/early/2017/07/20/166298>.
- [10] Chang, C. C. *et al.* Second-generation PLINK: rising to the challenge of larger and richer datasets. *GigaScience* **4**, 7 (2015).
- [11] Purcell, S. M. & Chang, C. PLINK 1.9. URL [www.cog-genomics.org/plink/1.9/](http://www.cog-genomics.org/plink/1.9/).
- [12] Border, R. *et al.* Imputation of Behavioral Candidate Gene Repeat Polymorphisms in 486,551 Publicly-Available UK Biobank Individuals. *bioRxiv* 358267 (2018). URL <https://www.biorxiv.org/content/early/2018/06/29/358267>.
- [13] Heils, A. *et al.* Allelic variation of human serotonin transporter gene expression. *Journal of Neurochemistry* **66**, 2621–2624 (1996).
- [14] Smith, D. J. *et al.* Prevalence and Characteristics of Probable Major Depression and Bipolar Disorder within UK Biobank: Cross-Sectional Study of 172,751 Participants. *PLOS ONE* **8**, e75362 (2013). URL <http://journals.plos.org/plosone/article?id=10.1371/journal.pone.0075362>.
- [15] Spitzer, R. L., Kroenke, K., Williams, J. B. & Group, P. H. Q. P. C. S. Validation and utility of a self-report version of PRIME-MD: the PHQ primary care study. *Jama* **282**, 1737–1744 (1999).
- [16] First, M. B., Gibbon, M., Spitzer, R. L. & Williams, J. B. W. User’s guide for the structured clinical interview for DSM-IV axis I Disorders—Research version. *New York: Biometrics Research Department, New York State Psychiatric Institute* (1996).
- [17] Townsend, P. Deprivation. *Journal of social policy* **16**, 125–146 (1987). Citation Key: townsend1987deprivation bibtex[publisher=Cambridge University Press].
- [18] Yzerbyt, V. Y., Muller, D. & Judd, C. M. Adjusting researchers’ approach to adjustment: On the use of covariates when testing interactions. *Journal of Experimental Social Psychology* **40**, 424–431 (2004). URL <http://www.sciencedirect.com/science/article/pii/S0022103103001598>.

- [19] Hull, J. G., Tedlie, J. C. & Lehn, D. A. Moderator Variables in Personality Research: The Problem of Controlling for Plausible Alternatives, Moderator Variables in Personality Research: The Problem of Controlling for Plausible Alternatives. *Personality and Social Psychology Bulletin* **18**, 115–117 (1992). URL <https://doi.org/10.1177/0146167292182001>.
- [20] Keller, M. C. Gene Environment Interaction Studies Have Not Properly Controlled for Potential Confounders: The Problem and the (Simple) Solution. *Biological Psychiatry* **75**, 18–24 (2014). URL [https://www.biologicalpsychiatryjournal.com/article/S0006-3223\(13\)00825-1/abstract](https://www.biologicalpsychiatryjournal.com/article/S0006-3223(13)00825-1/abstract).
- [21] Björck, Å. *Numerical methods in matrix computations*, vol. 59 (Springer, 2015).
- [22] Leeuw, C. A. d., Mooij, J. M., Heskes, T. & Posthuma, D. MAGMA: Generalized Gene-Set Analysis of GWAS Data. *PLOS Computational Biology* **11**, e1004219 (2015). URL <http://journals.plos.org/ploscompbiol/article?id=10.1371/journal.pcbi.1004219>.
- [23] MacArthur, J. *et al.* The new NHGRI-EBI Catalog of published genome-wide association studies (GWAS Catalog). *Nucleic Acids Research* **45**, D896–D901 (2017). URL <https://www.ncbi.nlm.nih.gov/pmc/articles/PMC5210590/>.
- [24] Lips, E. S. *et al.* Functional gene group analysis identifies synaptic gene groups as risk factor for schizophrenia. *Molecular Psychiatry* **17**, 996–1006 (2012).
- [25] Ruano, D. *et al.* Functional gene group analysis reveals a role of synaptic heterotrimeric G proteins in cognitive ability. *American Journal of Human Genetics* **86**, 113–125 (2010).
- [26] Liu, J. Z. *et al.* A versatile gene-based test for genome-wide association studies. *American Journal of Human Genetics* **87**, 139–145 (2010).
- [27] Consortium, T. . G. P. A global reference for human genetic variation. *Nature* **526**, 68–74 (2015). URL <https://www.nature.com/articles/nature15393>.
- [28] Purcell, S., Cherny, S. S. & Sham, P. C. Genetic Power Calculator: design of linkage and association genetic mapping studies of complex traits. *Bioinformatics* **19**, 149–150 (2003). URL <https://academic.oup.com/bioinformatics/article/19/1/149/316873>.
- [29] Kessler, R. C. & Bromet, E. J. The epidemiology of depression across cultures. *Annual review of public health* **34**, 119–138 (2013). URL <https://www.ncbi.nlm.nih.gov/pmc/articles/PMC4100461/>.
- [30] Bulik-Sullivan, B. *et al.* An atlas of genetic correlations across human diseases and traits. *Nature Genetics* **47**, 1236–1241 (2015). URL <https://www.nature.com/articles/ng.3406>.
- [31] Bulik-Sullivan, B. K. *et al.* LD Score regression distinguishes confounding from polygenicity in genome-wide association studies. *Nature Genetics* **47**, 291–295 (2015). URL <https://www.nature.com/articles/ng.3211>.
- [32] Loh, P.-R., Kichaev, G., Gazal, S., Schoech, A. P. & Price, A. L. Mixed-model association for biobank-scale datasets. *Nature genetics* **1** (2018).
- [33] Wood, A. R. *et al.* Defining the role of common variation in the genomic and biological architecture of adult human height. *Nature Genetics* **46**, 1173–1186 (2014).
- [34] Morris, A. P. *et al.* Large-scale association analysis provides insights into the genetic architecture and pathophysiology of type 2 diabetes. *Nature Genetics* **44**, 981–990 (2012).
- [35] Holman, N., Young, B. & Gadsby, R. What is the current prevalence of diagnosed and yet to be diagnosed diabetes in the UK. *Diabetic Medicine* **31**, 510–511. URL <https://onlinelibrary.wiley.com/doi/abs/10.1111/dme.12397>.
- [36] Huang, J. *et al.* Improved imputation of low-frequency and rare variants using the UK10k haplotype reference panel. *Nature Communications* **6**, 8111 (2015). URL <https://www.nature.com/articles/ncomms9111>.



- 
- [37] Xiao, R. & Boehnke, M. Quantifying and correcting for the winner's curse in genetic association studies. *Genetic epidemiology* **33**, 453–462 (2009). URL <https://www.ncbi.nlm.nih.gov/pmc/articles/PMC2706290/>.
- [38] Zhong, H. & Prentice, R. L. Bias-reduced estimators and confidence intervals for odds ratios in genome-wide association studies. *Biostatistics* **9**, 621–634 (2008). URL <https://academic.oup.com/biostatistics/article/9/4/621/258822>.
- [39] Cross-validated mixed-datatype bandwidth selection for nonparametric cumulative distribution/survivor functions: *Econometric Reviews*: Vol 36, No 6-9. URL <https://www.tandfonline.com/doi/full/10.1080/07474938.2017.1307900?src=recsys>.
